# Supplementary material for: SO42− ions as a nucleophilic reagent: straightforward electrochemical access to organosulfates
Source: Royal Society of Chemistry journal article supplement (doi:10.1039/d3cc03960a), 2023-01-01

*Supporting Information*

**SO<sub>4</sub><sup>2-</sup> ions as nucleophilic reagent: straightforward electrochemical  
access to organosulfates**

Chen Li, Zhuo Chen, Xue-Yang Guo, Li-Rong Wen, Ming Li,\* Lin-Bao Zhang\*

State Key Laboratory Base of Eco-Chemical Engineering, College of Chemistry and Molecular  
Engineering, Qingdao University of Science & Technology, Qingdao 266042, China

\*E-mail: [zhang\\_linbao@126.com](mailto:zhang_linbao@126.com), [liming928@qust.edu.cn](mailto:liming928@qust.edu.cn)

## Table of Contents

|                                                                               |           |
|-------------------------------------------------------------------------------|-----------|
| <b>1. General information .....</b>                                           | <b>3</b>  |
| <b>2. General Procedure for the Synthesis of the starting materials .....</b> | <b>4</b>  |
| <b>3. General procedure .....</b>                                             | <b>5</b>  |
| <b>4. Optimization of reaction conditions.....</b>                            | <b>6</b>  |
| <b>5. Gram-scale reaction.....</b>                                            | <b>10</b> |
| <b>6. Fluorescent spectra in solution .....</b>                               | <b>11</b> |
| <b>7. Fluorescence Microscopic Studies.....</b>                               | <b>12</b> |
| <b>8. Product transformation.....</b>                                         | <b>13</b> |
| <b>9. Cyclic voltammetry study .....</b>                                      | <b>13</b> |
| <b>10. Control experiments .....</b>                                          | <b>17</b> |
| <b>11. Proposed mechanism .....</b>                                           | <b>18</b> |
| <b>12. Unsuccessful substrates .....</b>                                      | <b>19</b> |
| <b>13. The reaction promoted by external oxidants .....</b>                   | <b>19</b> |
| <b>13. References.....</b>                                                    | <b>20</b> |
| <b>14. Characterization of products.....</b>                                  | <b>23</b> |

## 1. General information

All reactions were carried out in sealed N<sub>2</sub> using oven dried glassware. 1,1,1,3,3,3-Hexafluoro-2-propanol, Chloroform, Tetrabutylammonium hydrogen sulfate, Diethylamine, Carbon rod electrodes, platinum electrodes were all available from commercial sources. The electrochemical instrument was HONGSHENGFENG DPS-305CF. Column chromatography was performed on silica gel (200-300 mesh). NMR spectra were recorded in CDCl<sub>3</sub> on 500 MHz spectrometers. <sup>1</sup>H NMR chemical shifts (δ) are reported in parts per million relatives to tetramethylsilane (0 ppm). The following abbreviations are used for multiplicities: s = singlet, d = doublet, t = triplet, q = quartet, dd = doublet of doublets, and dt = doublet of triplets, m = multiplet. HRMS(ESI-TOF) were obtained on an Ultima Global spectrometer with an ESI source and were produced by America waters (acquit uplc h-class/xevo g2).

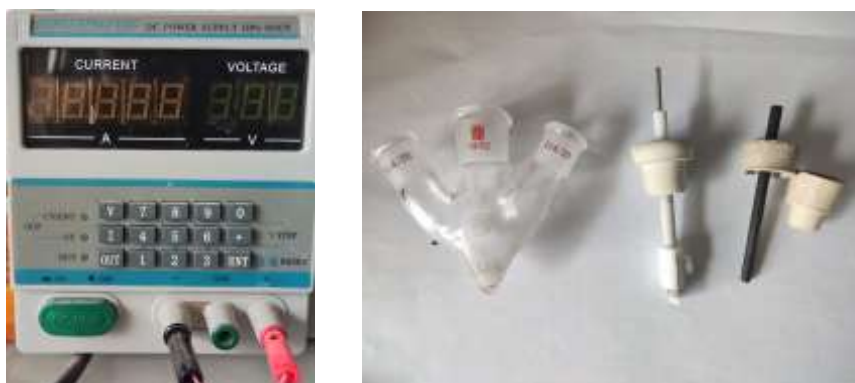

**Scheme S1.** Components required for the reaction

## 2. General Procedure for the Synthesis of the starting materials

### Preparation of substrates 1<sup>1</sup>

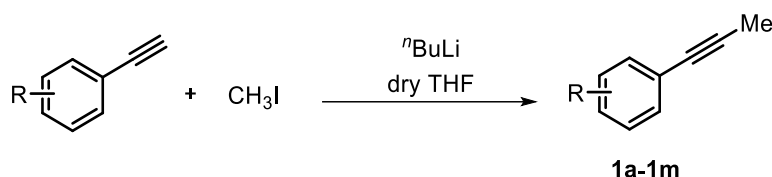

The compounds **1a-1m** were prepared according to previously described methods. To a flame-dried round-bottom flask under N<sub>2</sub> was added alkyne (5.0 mmol) followed by dry THF (33.0 mL, 0.2 M). Cool the flask to 0 °C. <sup>n</sup>BuLi (4.0 mL, 2.5 M in hexanes, 10.0 mmol, 2.0 equiv.) was added slowly and the reaction was allowed to stir for 1 hour. Iodomethane (0.65 mL, 10.2 mmol, 2.1 equiv.) was added at -20 °C and the reaction was allowed to stir at room temperature for 3 ~ 5 hours (when most of alkyne was consumed as detected by TLC). The reaction was quenched with a saturated solution of ammonium chloride and extracted with ethyl acetate. The organics were dried over MgSO<sub>4</sub> and the solvents were removed under reduced pressure. The residue was purified by silica chromatography to afford the corresponding compounds **1a-1m**.

### Preparation of substrates 2<sup>2</sup>

The compound **2a-2m** according to previously described methods.

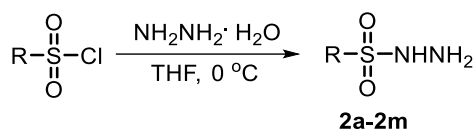

The hydrazine hydrate (80%, 3.0 mmol) was added dropwise into the solution of sulfonyl chloride (1.0 mmol) in THF (5.0 mL) under air at 0 °C. Subsequently, the mixture was further stirred at 0 °C for 5 minutes. After the completion of the reaction, the residue was extracted with dichloromethane, and the combined organic layer was ashed with water, and brine, and dried over MgSO<sub>4</sub>. Concentration in vacuum followed by silica column purification with petroleum ether/ethyl acetate eluent gave the desired products **2a-2m**.

### Preparation of substrates 3<sup>3</sup>

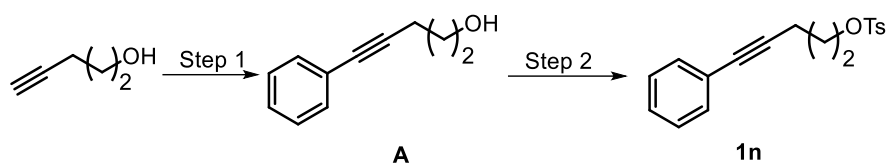

Step1: To a 100.0 mL flame-dried round-bottom flask, under N<sub>2</sub>, was added PdCl<sub>2</sub>(PPh<sub>3</sub>)<sub>2</sub> (0.1 mmol, 0.01 equiv.), CuI (0.2 mmol, 0.02 equiv.), iodobenzene (12.0 mmol, 1.2 equiv.), alkyne (10.0 mmol, 1.0 equiv.) and dry Et<sub>3</sub>N (20.0 mL), the reaction was allowed to stir at room temperature. The reaction was stirred overnight checked by TLC. The reaction is filtered over celite, washing with dichloromethane. The solvent was removed and the residue purified by flash column chromatography on silica gel to give compounds **A**.

Step2: To a stirred solution of Compound **A** (5.0 mmol, 1.0 equiv.), dimethylaminopyridine (DMAP) (0.5 mmol, 0.1 equiv.) and TEA (10.0 mmol, 2.0 equiv.) in dry DCM (10.0 mL) at 0 °C was added ptoluenesulfonyl chloride (TsCl) (6.0 mmol, 1.2 equiv.) portion wise. The reaction mixture was stirred for 1 hour and then quenched with water, extracted with ethyl acetate, dried over anhydrous MgSO<sub>4</sub>, concentrated and chromatography on silica gel to give compounds **1n**.

### 3. General procedure

In an undivided Schlenk flask (10.0 mL) equipped with a stir bar, substrate **1** (0.2 mmol, 1.0 equiv.), substrate **2** (0.6 mmol, 3.0 equiv.), <sup>n</sup>Bu<sub>4</sub>NHSO<sub>4</sub> (0.8 mmol, 4.0 equiv.) and Et<sub>2</sub>NH (0.2 mmol, 1.0 equiv.) were combined and added. The flask was equipped with a rubber stopper, a carbon rod (C) anode and a platinum cathode (10 mm x 10 mm x 0.1 mm) and then flushed with nitrogen. Then HFIP (3.0 mL) and CHCl<sub>3</sub> (2.0 mL) were injected respectively into the flask *via* syringes. The reaction mixture was stirred and electrolyzed at a controlled current of 3.0 mA at 25 °C for 6.5 hours. After the reaction (monitored by TLC), the reaction system was filtered and concentrated under reduced pressure. The residue was purified by silica gel column chromatography and eluted with ethyl acetate to give the product.

## 4. Optimization of reaction conditions

**Table S1.** Optimization of reaction conditions<sup>a</sup>

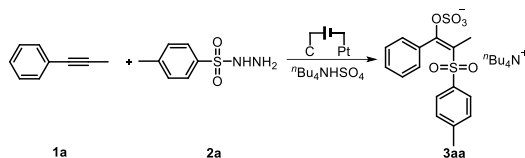

| Entry | Deviation from standard conditions <sup>a</sup>              | Yield <sup>b</sup> (%) |
|-------|--------------------------------------------------------------|------------------------|
| 1     | none                                                         | 72                     |
| 2     | 5 mA, 3.5 h                                                  | 43                     |
| 3     | 1 mA, 10 h                                                   | 51                     |
| 4     | Mg cathode                                                   | 36                     |
| 5     | Ni cathode                                                   | 41                     |
| 6     | DCE instead of CHCl <sub>3</sub>                             | 51                     |
| 7     | DCM instead of CHCl <sub>3</sub>                             | 61                     |
| 8     | CH <sub>3</sub> CN instead of CHCl <sub>3</sub>              | trace                  |
| 9     | Et <sub>3</sub> N instead of Et <sub>2</sub> NH              | 64                     |
| 10    | <sup>i</sup> PrNH instead of Et <sub>2</sub> NH              | 48                     |
| 11    | K <sub>2</sub> CO <sub>3</sub> instead of Et <sub>2</sub> NH | 21                     |
| 12    | Without Et <sub>2</sub> NH                                   | 45                     |
| 13    | 40 °C                                                        | 43                     |
| 14    | under air                                                    | 34                     |
| 15    | no electric current                                          | n.r.                   |

<sup>a</sup>Standard conditions: **1a** (0.2 mmol), **2a** (0.6 mmol), <sup>n</sup>Bu<sub>4</sub>NSO<sub>4</sub> (0.8 mmol), Et<sub>2</sub>NH (0.2 mmol), HFIP (3.0 mL), CHCl<sub>3</sub> (2.0 mL), carbon rod anode, platinum cathode (10 mm x 10 mm x 0.1 mm), constant current = 3.0 mA, under N<sub>2</sub>, RT, 6.5 h, undivided cell (3.63 F/mol). <sup>b</sup>Isolated yield. n.r. = no reaction. RT = room temperature.

**Table S2.** The effect of HFIP

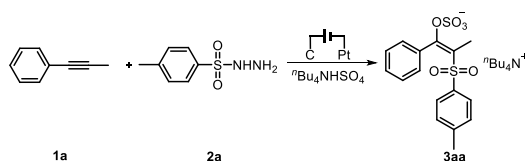

| Entry          | Deviation from standard conditions       | Yield <sup>d</sup> (%) |
|----------------|------------------------------------------|------------------------|
| <sup>a</sup> 1 | HFIP: CHCl <sub>3</sub> = 5.0 mL: 0.0 mL | 32                     |

|                 |                                          |       |
|-----------------|------------------------------------------|-------|
| <sup>a</sup> 2  | HFIP: CHCl <sub>3</sub> = 4.5 mL: 0.5 mL | 41    |
| <sup>a</sup> 3  | HFIP: CHCl <sub>3</sub> = 4.0 mL: 1.0 mL | 52    |
| <sup>a</sup> 4  | HFIP: CHCl <sub>3</sub> = 3.5 mL: 1.5 mL | 64    |
| <sup>a</sup> 5  | HFIP: CHCl <sub>3</sub> = 3.0 mL: 2.0 mL | 72    |
| <sup>a</sup> 6  | HFIP: CHCl <sub>3</sub> = 2.0 mL: 3.0 mL | 56    |
| <sup>a</sup> 7  | HFIP: CHCl <sub>3</sub> = 1.0 mL: 4.0 mL | 42    |
| <sup>a</sup> 8  | HFIP: CHCl <sub>3</sub> = 0.5 mL: 4.5 mL | 0     |
| <sup>b</sup> 9  | HFIP: CHCl <sub>3</sub> = 3.0 mL: 2.0 mL | 33    |
| <sup>b</sup> 10 | CHCl <sub>3</sub> = 5.0 mL               | trace |
| <sup>b</sup> 11 | CH <sub>3</sub> CN = 5.0 mL              | trace |
| <sup>b</sup> 12 | CH <sub>3</sub> NO <sub>2</sub> = 5.0 mL | trace |
| <sup>b</sup> 13 | DCE = 5.0 mL                             | trace |
| <sup>b</sup> 14 | CH <sub>3</sub> OH = 5.0 mL              | trace |
| <sup>c</sup> 15 | <sup>i</sup> Pr <sub>2</sub> NH as base  | trace |
| <sup>c</sup> 16 | Et <sub>3</sub> N as base                | trace |
| <sup>c</sup> 17 | Pyridine as base                         | trace |
| <sup>c</sup> 18 | Na <sub>2</sub> CO <sub>3</sub> as base  | trace |

<sup>a</sup>Standard conditions: **1a** (0.2 mmol), **2a** (0.6 mmol), <sup>n</sup>Bu<sub>4</sub>NSO<sub>4</sub> (0.8 mmol), Et<sub>2</sub>NH (0.2 mmol), HFIP (3.0 mL), CHCl<sub>3</sub> (2.0 mL), carbon rod anode, platinum cathode (10 mm x 10 mm x 0.1 mm), constant current = 3.0 mA, under N<sub>2</sub>, RT, 6.5 h, undivided cell (3.63 F/mol). <sup>b</sup>Standard conditions: **1a** (0.2 mmol), **2a** (0.6 mmol), <sup>n</sup>Bu<sub>4</sub>NSO<sub>4</sub> (0.8 mmol), Et<sub>2</sub>NH (0.2 mmol), HFIP (3.0 mL), CHCl<sub>3</sub> (2.0 mL), carbon rod anode, platinum cathode (10 mm x 10 mm x 0.1 mm), constant current = 3.0 mA, under N<sub>2</sub>, RT, 6.5 h, divided cell. <sup>c</sup>Standard conditions: **1a** (0.2 mmol), **2a** (0.6 mmol), <sup>n</sup>Bu<sub>4</sub>NSO<sub>4</sub> (0.8 mmol), base (0.2 mmol), CH<sub>3</sub>CN (5.0 mL), carbon rod anode, platinum cathode (10 mm x 10 mm x 0.1 mm), constant current = 3.0 mA, under N<sub>2</sub>, RT, 6.5 h, divided cell. <sup>d</sup>Isolated yield. RT = room temperature.

Table S3. The effect of various additives

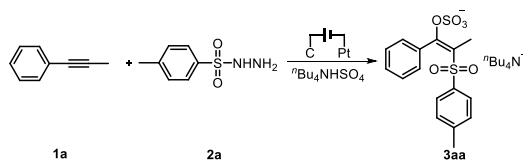

| Entry | Deviation from standard conditions <sup>a</sup> | Yield <sup>b</sup> (%) |
|-------|-------------------------------------------------|------------------------|
| 1     | DMAP                                            | 46                     |
| 2     | <sup>i</sup> PrNEt                              | 51                     |
| 3     | N,N-dimethylaniline                             | 63                     |

|    |                                 |    |
|----|---------------------------------|----|
| 4  | Morpholine                      | 69 |
| 5  | Dibenzylamine                   | 70 |
| 6  | Dibutylamine                    | 71 |
| 7  | NaOH                            | 34 |
| 8  | CS <sub>2</sub> CO <sub>3</sub> | 31 |
| 9  | AcOH                            | 46 |
| 10 | DBU                             | 58 |
| 11 | Cp <sub>2</sub> Fe              | 52 |
| 12 | DABCO                           | 47 |

<sup>a</sup>Standard conditions: **1a** (0.2 mmol), **2a** (0.6 mmol), <sup>n</sup>Bu<sub>4</sub>NSO<sub>4</sub> (0.8 mmol), Et<sub>2</sub>NH (0.2 mmol), HFIP (3.0 mL), CHCl<sub>3</sub> (2.0 mL), carbon rod anode, platinum cathode (10 mm x 10 mm x 0.1 mm), constant current = 3.0 mA, under N<sub>2</sub>, RT, 6.5 h, undivided cell (3.63 F/mol). <sup>b</sup>Isolated yield. RT = room temperature.

Table S4. The effect of different ratios of **1a** and **2a**

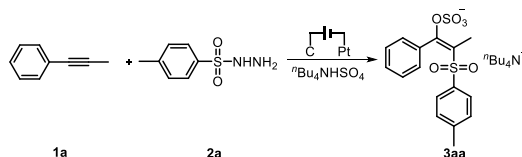

| Entry          | Deviation from standard conditions | Yield <sup>c</sup> (%) |
|----------------|------------------------------------|------------------------|
| <sup>a</sup> 1 | <b>1a: 2a</b> = 1:1                | 42                     |
| <sup>a</sup> 2 | <b>1a: 2a</b> = 1:2                | 61                     |
| <sup>a</sup> 3 | <b>1a: 2a</b> = 1:3                | 72                     |
| <sup>a</sup> 4 | <b>1a: 2a</b> = 1:4                | 54                     |
| <sup>a</sup> 5 | <b>1a: 2a</b> = 1:5                | 39                     |
| <sup>b</sup> 6 | <b>1a: 2a</b> = 2:1                | 43                     |
| <sup>b</sup> 7 | <b>1a: 2a</b> = 3:1                | 51                     |
| <sup>b</sup> 8 | <b>1a: 2a</b> = 4:1                | 39                     |
| <sup>b</sup> 9 | <b>1a: 2a</b> = 5:1                | 34                     |

<sup>a</sup>Standard conditions: **1a**, **2a**, <sup>n</sup>Bu<sub>4</sub>NSO<sub>4</sub> (0.8 mmol), Et<sub>2</sub>NH (0.2 mmol), HFIP (3.0 mL), CHCl<sub>3</sub> (2.0 mL), carbon rod anode, platinum cathode (10 mm x 10 mm x 0.1 mm), constant current = 3.0 mA, under N<sub>2</sub>, RT, 6.5 h, undivided cell (3.63 F/mol). <sup>b</sup>Standard conditions: **1a** (0.6 mmol), **2a** (0.2 mmol), <sup>n</sup>Bu<sub>4</sub>NSO<sub>4</sub> (0.8 mmol), Et<sub>2</sub>NH (0.2 mmol), HFIP (3.0 mL), CHCl<sub>3</sub> (2.0 mL), carbon rod anode, platinum cathode (10 mm x 10 mm x 0.1 mm), constant current = 3.0 mA, under N<sub>2</sub>, RT, 6.5 h, undivided cell. <sup>c</sup>Isolated yield. RT = room temperature.

Table S5. The reaction times of **1a**



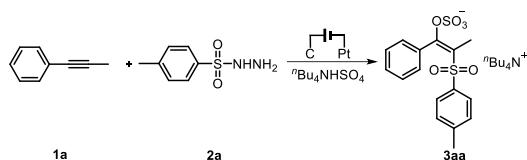

| Entry | Deviation from standard conditions <sup>a</sup> | Yield <sup>b</sup> (%) |
|-------|-------------------------------------------------|------------------------|
| 1     | 2.0 h                                           | 24                     |
| 2     | 4.0 h                                           | 41                     |
| 3     | 6.0 h                                           | 67                     |
| 4     | 8.0 h                                           | 61                     |
| 5     | 10.0 h                                          | 54                     |

<sup>a</sup>Standard conditions: **1a** (0.2 mmol), **2a** (0.6 mmol), <sup>n</sup>Bu<sub>4</sub>NHSO<sub>4</sub> (0.8 mmol), Et<sub>2</sub>NH (0.2 mmol), HFIP (3.0 mL), CHCl<sub>3</sub> (2.0 mL), carbon rod anode, platinum cathode (10 mm x 10 mm x 0.1 mm), constant current = 3.0 mA, under N<sub>2</sub>, RT, 6.5 h, undivided cell (3.63 F/mol). <sup>b</sup>Isolated yield. RT = room temperature.

Table S6. The reaction times of **4**

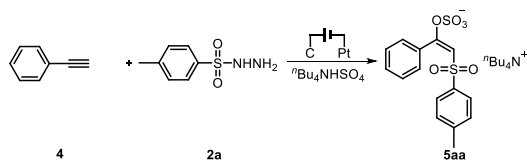

| Entry | Deviation from standard conditions <sup>a</sup> | Yield <sup>b</sup> (%) |
|-------|-------------------------------------------------|------------------------|
| 1     | 2.0 h                                           | 29                     |
| 2     | 4.0 h                                           | 51                     |
| 3     | 6.0 h                                           | 43                     |
| 4     | 8.0 h                                           | 37                     |
| 5     | 10.0 h                                          | 35                     |

<sup>a</sup>Standard conditions: **4** (0.2 mmol), **2a** (0.6 mmol), <sup>n</sup>Bu<sub>4</sub>NHSO<sub>4</sub> (0.8 mmol), Et<sub>3</sub>N (0.2 mmol), HFIP (3.0 mL), CHCl<sub>3</sub> (2.0 mL), carbon rod anode, platinum cathode (10 mm x 10 mm x 0.1 mm), constant current = 3.0 mA, under N<sub>2</sub>, RT, 4.0 h, undivided cell (2.24 F/mol). <sup>b</sup>Isolated yield. RT = room temperature.

## 5. Gram-scale reaction

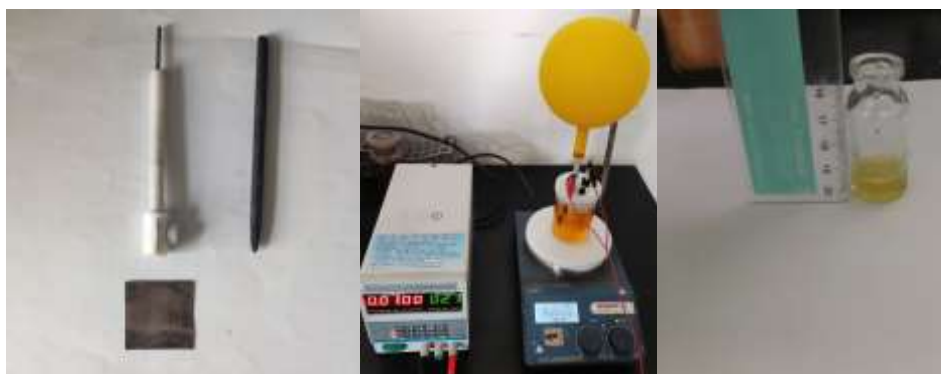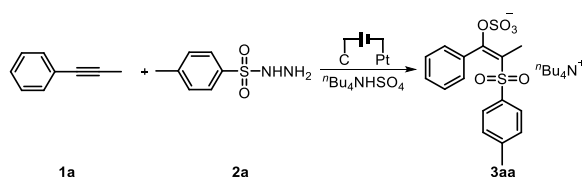

In an undivided Schlenk flask (100.0 mL) equipped with a stir bar, substrate **1a** (5.0 mmol, 1.0 equiv.), sulfonamide **2a** (15.0 mmol, 3.0 equiv.),  $t\text{Bu}_4\text{NHSO}_4$  (20.0 mmol, 4.0 equiv.),  $\text{Et}_2\text{NH}$  (5.0 mmol 1.0 equiv.) were combined and added. The flask was equipped with a rubber stopper, a carbon rod (C) anode and a platinum cathode (30 mm x 30 mm x 0.1 mm) and then flushed with nitrogen. Then HFIP (60.0 mL) and  $\text{CHCl}_3$  (30.0 mL) were injected respectively into the undivided Schlenk flask *via* syringes. The reaction mixture was stirred and electrolyzed at a controlled current of 10.0 mA at room temperature for 48 hours. After the reaction (monitored by TLC), the reaction system was filtered and concentrated under reduced pressure. The residue was purified by silica gel column chromatography and eluted with ethyl acetate to give the product **3aa** (2.1 g, 74%).

## 6. Fluorescent spectra in solution

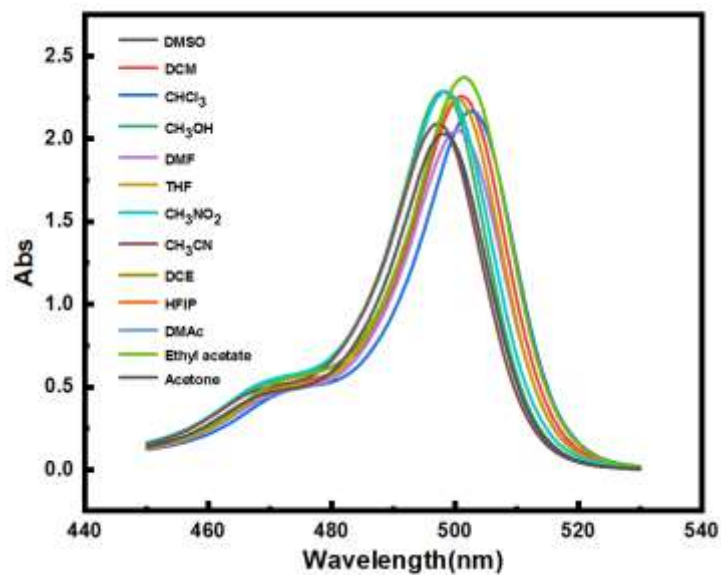

**Figure S1.** Ultraviolet absorption spectra of 7 in different solution

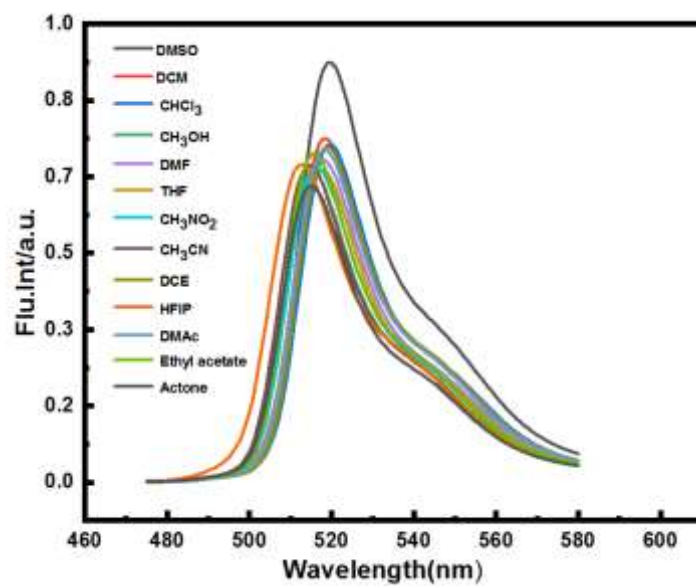

**Figure S2.** Fluorescent spectra of 7 in different solution

**Table S7.** Fluorescent spectra data of **7** in different solvent

| Solvent                         | Max $\lambda_{em}$<br>[nm] | a.u. | Solvent            | Max $\lambda_{em}$<br>[nm] | a.u. |
|---------------------------------|----------------------------|------|--------------------|----------------------------|------|
| DMSO                            | 519                        | 0.88 | CH <sub>3</sub> CN | 514                        | 0.65 |
| DCM                             | 518                        | 0.70 | DCE                | 519                        | 0.66 |
| CHCl <sub>3</sub>               | 519                        | 0.81 | HFIP               | 513                        | 0.94 |
| CH <sub>3</sub> OH              | 515                        | 0.61 | DMAc               | 518                        | 0.65 |
| DMF                             | 518                        | 0.75 | Ethyl acetate      | 516                        | 0.60 |
| THF                             | 517                        | 0.66 | Actone             | 515                        | 0.64 |
| CH <sub>3</sub> NO <sub>2</sub> | 516                        | 0.64 |                    |                            |      |

## 7. Fluorescence Microscopic Studies

**Cell culture.** All cells were cultured in confocal culture dishes and incubates overnight at 37 °C in a humidified atmosphere of 5% CO<sub>2</sub> for 24 hours to allow for firm adherence. After being rinsed with 1xPBS buffer, the cells were incubated with the **7** for 2 h at 37 C.

**Fluorescence microscopic imaging.** All the experiments were conducted in live cells. The living cell imaging was measured by Nikon C2 plus with an excitation filter of 488 nm and the collection wavelength range is at 490-550 nm.

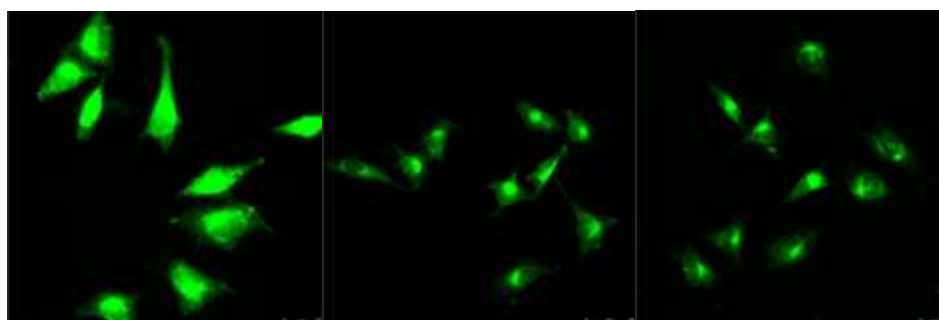**Figure S3.** Fluorescence intensity of **7** in MCF-7 cells

## 8. Product transformation

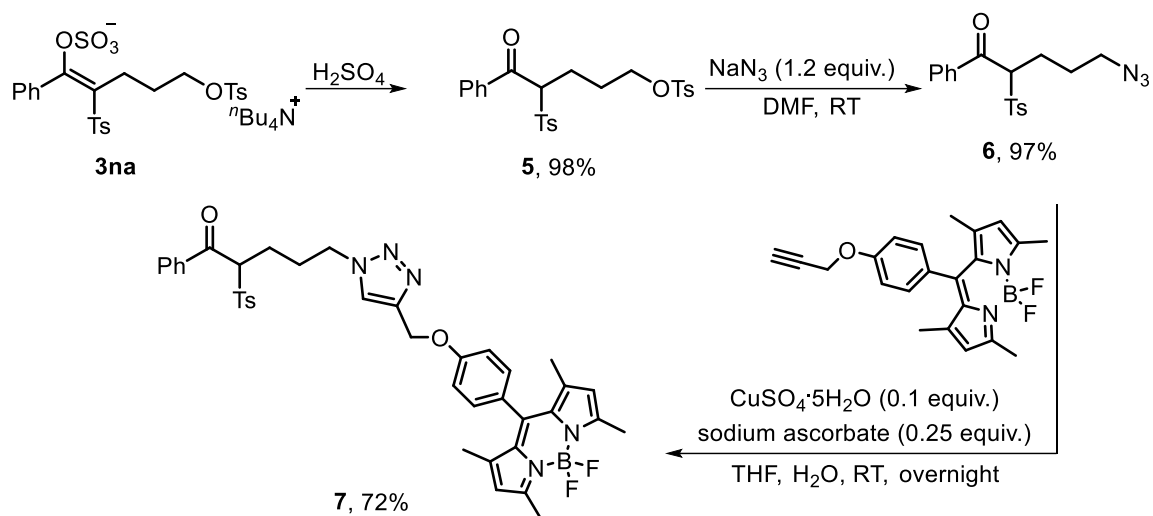

Step 1: Take 0.1 mmol **3na** into 25.0 mL round flask, add sulfuric acid solution and stir for 30 min, extract the system with dichloromethane, dried over anhydrous  $\text{Na}_2\text{SO}_4$ . The solvent was removed and the residue purified by flash column chromatography on silica gel to give compound **5** (yellow oil, 98 %).

Step 2: Sodium azide (0.24 mmol, 1.2 equiv.) was added to a solution of **5** (0.2 mmol, 1.0 equiv.) in DMF (1.1 mL) and stirred at room temperature overnight.  $\text{H}_2\text{O}$  was added to the mixture and the aqueous phase was extracted with ethyl acetate. The combined organic extract was washed with saturated aqueous  $\text{NaCl}$  solution, dried over anhydrous  $\text{Na}_2\text{SO}_4$ . The solvent was removed and the residue purified by flash column chromatography on silica gel to give compound **6** (yellow oil, 97 %).

Step 3: To a solution of compound **6** (0.2 mmol, 1.0 equiv.) in a 1:1 mixture of THF:  $\text{H}_2\text{O}$  (5.0 mL) were added copper (II) sulfate (0.02 mmol, 0.1 equiv.), sodium ascorbate (0.05 mmol, 0.25 equiv.) and the BODIPY (0.26 mmol, 1.3 equiv.). The mixture was brine, dried over anhydrous  $\text{Na}_2\text{SO}_4$ . The solvent was evaporated in vacuum and purified by silica gel column chromatography to avail products **7** (orange solid, 72%).

## 9. Cyclic voltammetry study

The cyclic voltammetry experiments were carried out with a computer-controlled electrochemical analyzer for electrochemical measurements. The cyclic voltammetry experiments were measured at room temperature. The data was collected with the

CS300H potentiostat (Wuhan COster Instrument Co., LTD). The experiment was performed in a three-electrode cell with HFIP (3.0 mL) and  $\text{CHCl}_3$  (2.0 mL) as the solvent,  ${}^n\text{Bu}_4\text{NHSO}_4$  (0.4 mmol) as the supporting electrolyte, and the concentration of the **1a** was 0.1 mmol; the concentration of the **2a** was 0.3 mmol. The scan speed was 100 mV/s. The potential ranges investigated were 0.0 V to 3.0 V vs. SCE (saturated aqueous KCl). CV plotting convention is Origin.

**Working electrode:** The working electrode is a 3 mm diameter glassy carbon working electrode. Polished with 0.05  $\mu\text{m}$  aluminum oxide and then sonicated in distilled water and ethanol before measurements.

**Reference electrode:** The reference electrode is SCE (saturated aqueous KCl) that was washed with water and ethanol before measurements.

**Counter electrode:** The counter electrode is a platinum wire that was polished with 0.05  $\mu\text{m}$  aluminum oxide and then sonicated in distilled water and ethanol before measurements.

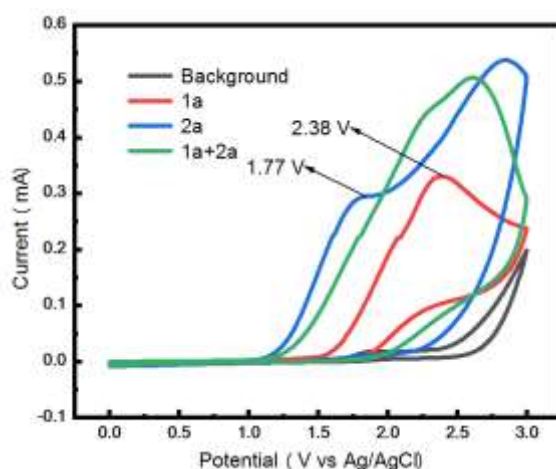

**Figure S4.** Cyclic voltammogram

**General procedure for cyclic voltammetry (CV):** Cyclic voltammograms of **1a** (0.1 mmol), **2a** (0.3 mmol), were performed in a three-electrode cell at room temperature. The working electrode was a steady glassy carbon, the counter electrode was a platinum wire, and the reference was an Ag/AgCl electrode submerged in saturated aqueous KCl solution. Mixed solvent [HFIP (3.0 mL) and  $\text{CHCl}_3$  (2.0 mL)] containing  ${}^n\text{Bu}_4\text{NHSO}_4$  (0.4 mmol) was poured into the electrochemical cell in cyclic voltammetry experiments. The scan rate was 100 mV/s, ranging from 0.0 V to 3.0 V.

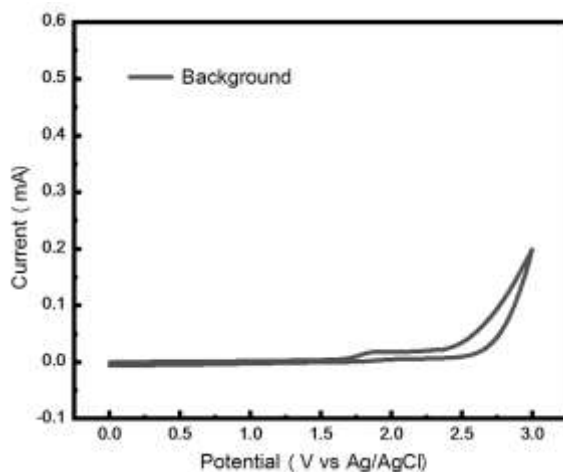

**Figure S5.** Cyclic voltammogram of Background

**General procedure for cyclic voltammetry (CV):** Cyclic voltammogram of Background was performed in a three-electrode cell at room temperature. The working electrode was a steady glassy carbon, the counter electrode was a platinum wire, and the reference was an Ag/AgCl electrode submerged in saturated aqueous KCl solution. Mixed solvent [HFIP (3.0 mL) and CHCl<sub>3</sub> (2.0 mL)] containing <sup>n</sup>Bu<sub>4</sub>NHSO<sub>4</sub> (0.4 mmol) was poured into the electrochemical cell in cyclic voltammetry experiments. The scan rate was 100 mV/s, ranging from 0.0 V to 3.0 V.

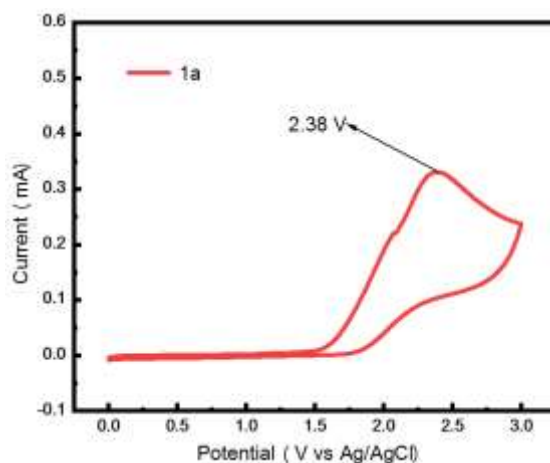

**Figure S6.** Cyclic voltammogram of **1a**

**General procedure for cyclic voltammetry (CV):** Cyclic voltammogram of **1a** (0.1 mmol) was performed in a three-electrode cell at room temperature. The working electrode was a steady glassy carbon, the counter electrode was a platinum wire, and the reference was an Ag/AgCl electrode submerged in saturated aqueous KCl solution. Mixed solvent [HFIP (3.0 mL) and CHCl<sub>3</sub> (2.0 mL)] containing <sup>n</sup>Bu<sub>4</sub>NHSO<sub>4</sub> (0.4 mmol)

was poured into the electrochemical cell in cyclic voltammetry experiments. The scan rate was 100 mV/s, ranging from 0.0 V to 3.0 V.

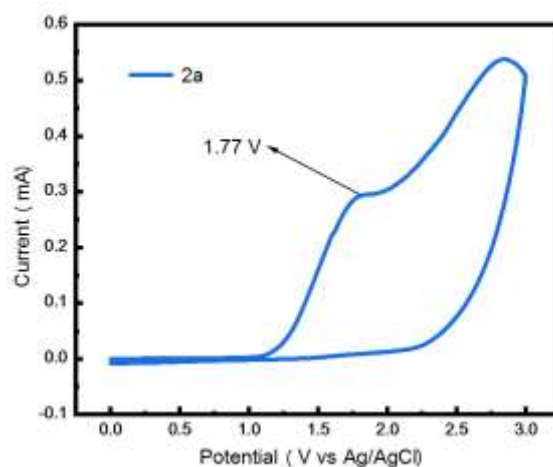

**Figure S7.** Cyclic voltammogram of **2a**

**General procedure for cyclic voltammetry (CV):** Cyclic voltammogram of **2a** (0.3 mmol) was performed in a three-electrode cell at room temperature. The working electrode was a steady glassy carbon, the counter electrode was a platinum wire, and the reference was an Ag/AgCl electrode submerged in saturated aqueous KCl solution. Mixed solvent [HFIP (3.0 mL) and CHCl<sub>3</sub> (2.0 mL)] containing <sup>n</sup>Bu<sub>4</sub>NHSO<sub>4</sub> (0.4 mmol) was poured into the electrochemical cell in cyclic voltammetry experiments. The scan rate was 100 mV/s, ranging from 0.0 V to 3.0 V.

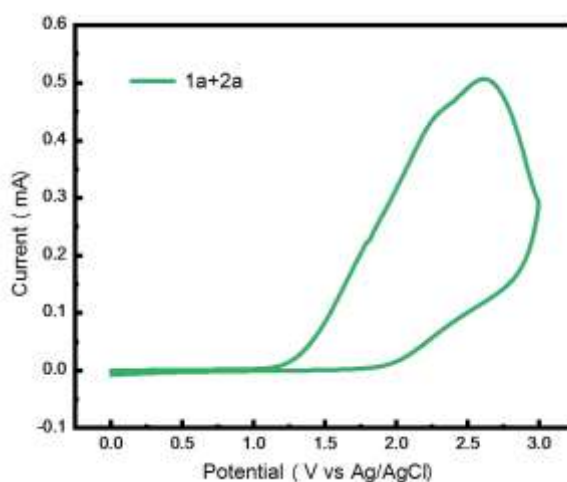

**Figure S8.** Cyclic voltammogram of **1a+2a**

**General procedure for cyclic voltammetry (CV):** Cyclic voltammograms of **1a** (0.1 mmol), **2a** (0.3 mmol), were performed in a three-electrode cell at room temperature. The working electrode was a steady glassy carbon, the counter electrode was a platinum



wire, and the reference was an Ag/AgCl electrode submerged in saturated aqueous KCl solution. Mixed solvent [HFIP (3.0 mL) and CHCl<sub>3</sub> (2.0 mL)] containing <sup>n</sup>Bu<sub>4</sub>NHSO<sub>4</sub> (0.4 mmol) was poured into the electrochemical cell in cyclic voltammetry experiments. The scan rate was 100 mV/s, ranging from 0.0 V to 3.0 V.

## 10. Control experiments

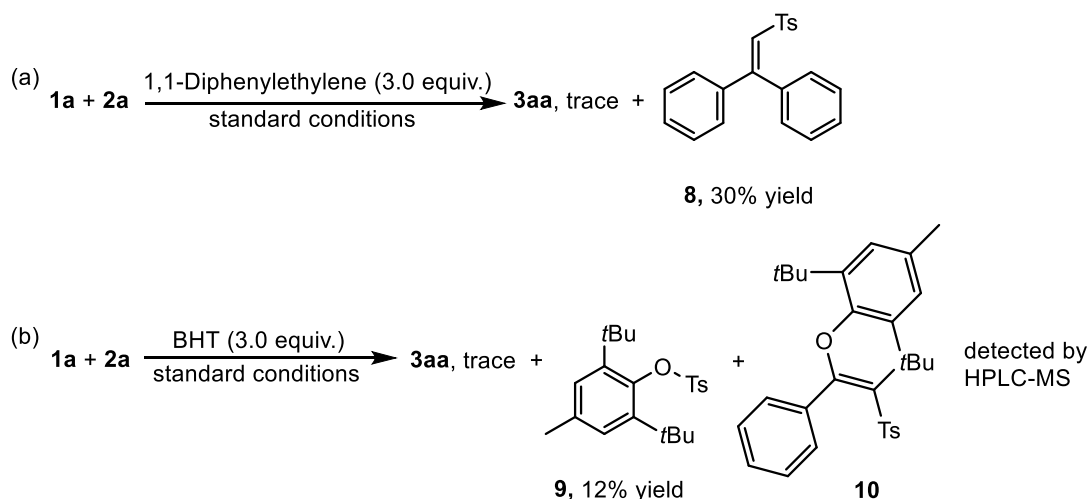

(a) In an undivided Schlenk flask (10.0 mL) equipped with a stir bar, substrate **1a** (0.2 mmol, 23.2 mg, 1.0 equiv.), sulfonyl hydrazides **2a** (0.6 mmol, 111.7 mg, 3.0 equiv.), <sup>n</sup>Bu<sub>4</sub>NHSO<sub>4</sub> (0.8 mmol, 271.6 mg, 4.0 equiv.), and 1,1-diphenylethylene (0.6 mmol, 54.1 mg, 3.0 equiv.) were combined and added. The flask was equipped with a rubber stopper, a carbon rod (C) anode and a platinum cathode (10 mm x 10 mm x 0.1 mm) and then flushed with nitrogen. Then HFIP (3.0 mL) and CHCl<sub>3</sub> (2.0 mL) were injected respectively into the flask *via* syringes. The reaction mixture was stirred and electrolyzed at a controlled current of 3.0 mA at room temperature for 6.5 hours. After the reaction (monitored by TLC), the reaction system was filtered and concentrated under reduced pressure. The residue was purified by silica gel column chromatography and eluted with petroleum ether and ethyl acetate to give the product **8** (60.1 mg, 30%).

(b) In an undivided Schlenk flask (10.0 mL) equipped with a stir bar, substrate **1a** (0.2 mmol, 23.2 mg, 1.0 equiv.), sulfonyl hydrazides **2a** (0.3 mmol, 111.7 mg, 3.0 equiv.), <sup>n</sup>Bu<sub>4</sub>NHSO<sub>4</sub> (0.8 mmol, 271.6 mg, 4.0 equiv.), and BHT (0.6 mmol, 66.1 mg, 3.0 equiv.) were combined and added. The flask was equipped with a rubber stopper, a carbon rod

(C) anode and a platinum cathode (10 mm x 10 mm x 0.1 mm) and then flushed with nitrogen. Then HFIP (3.0 mL) and CHCl<sub>3</sub> (2.0 mL) were injected respectively into the flask *via* syringes. The reaction mixture was stirred and electrolyzed at a controlled current of 3.0 mA at room temperature for 6.5 hours. After the reaction (monitored by TLC), the reaction system was filtered and concentrated under reduced pressure. The residue was purified by silica gel column chromatography and eluted with petroleum ether and ethyl acetate to give the product **9** (25.8 mg, 12%) and product **10** (detected by HPLC-MS).

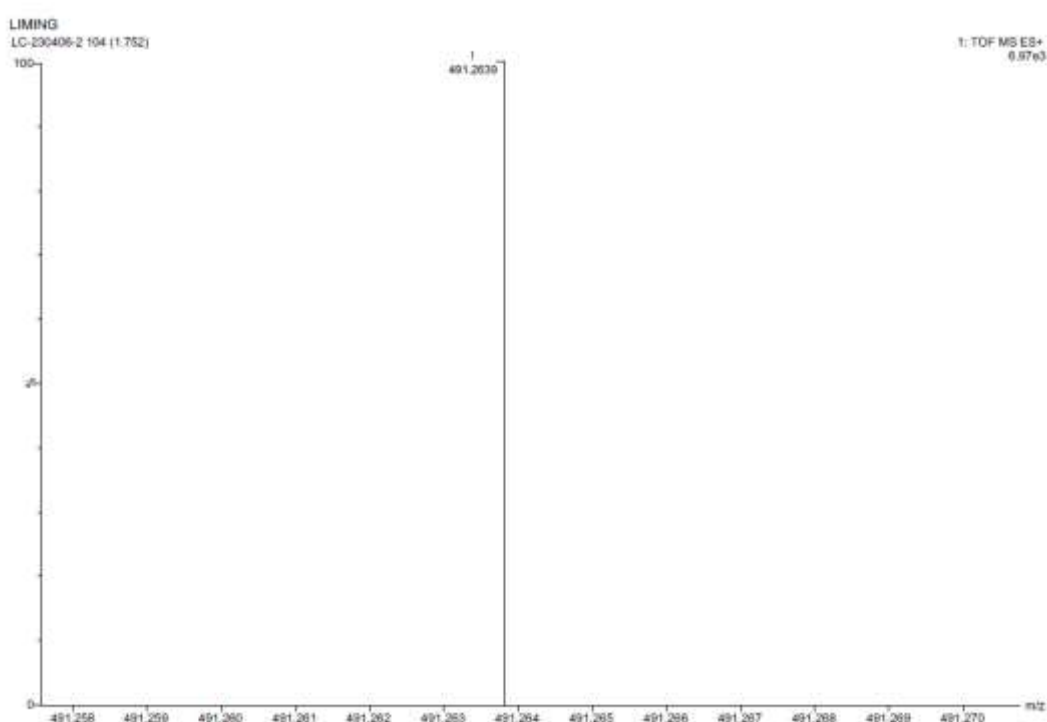

## 11. Proposed mechanism

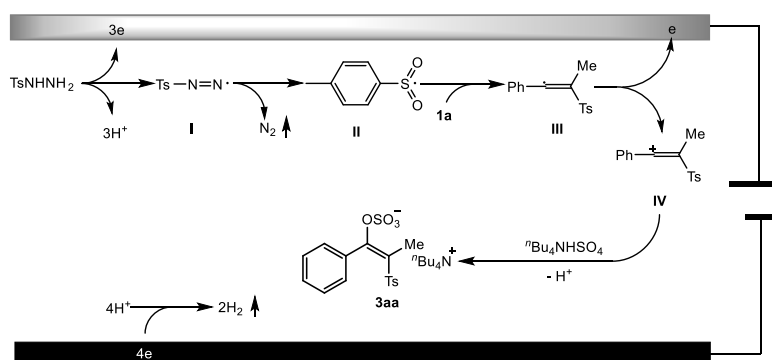

Scheme S2. Proposed mechanism

## 12. Unsuccessful substrates

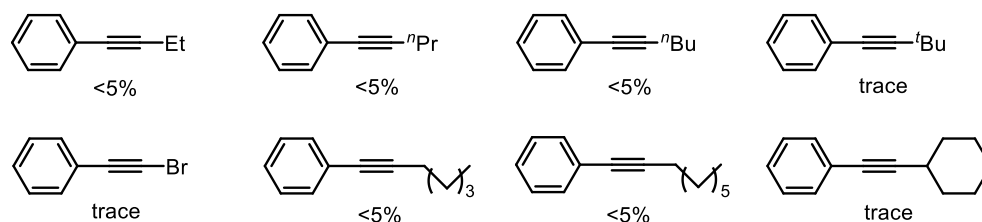

## 13. The reaction promoted by external oxidants

**Table S8.** The transformation promoted by external oxidants

| Entry | Conditions                                                                                    | Yield |
|-------|-----------------------------------------------------------------------------------------------|-------|
| 1     | TBAI (20 mol%), TBHP (2.0 equiv.), HFIP (3.0 mL), CHCl <sub>3</sub> (2.0 mL), 80 °C           | trace |
| 2     | I <sub>2</sub> (50 mol%), TBHP (2.0 equiv.), HFIP (3.0 mL), CHCl <sub>3</sub> (2.0 mL), 80 °C | 0     |
| 3     | FeCl <sub>3</sub> (10 mol%), air, HFIP (3.0 mL), CHCl <sub>3</sub> (2.0 mL), 80 °C            | 0     |
| 4     | CAN (2.0 equiv.), air, HFIP (3.0 mL), CHCl <sub>3</sub> (2.0 mL), RT                          | 0     |
| 5     | PCC (2.0 equiv.), air, HFIP (3.0 mL), CHCl <sub>3</sub> (2.0 mL), RT                          | 0     |
| 6     | KMnO <sub>4</sub> (10 mol%), air, HFIP (3.0 mL), CHCl <sub>3</sub> (2.0 mL), RT               | 0     |

RT = room temperature.

Substrate **1a** hardly took part in the reaction and the recovery was 92%. **2a** was consumed. Moreover, the self-coupling product of sulfonyl hydrazide (*S*-(*p*-tolyl) 4-methylbenzenesulfonothioate) was appeared in the reaction.

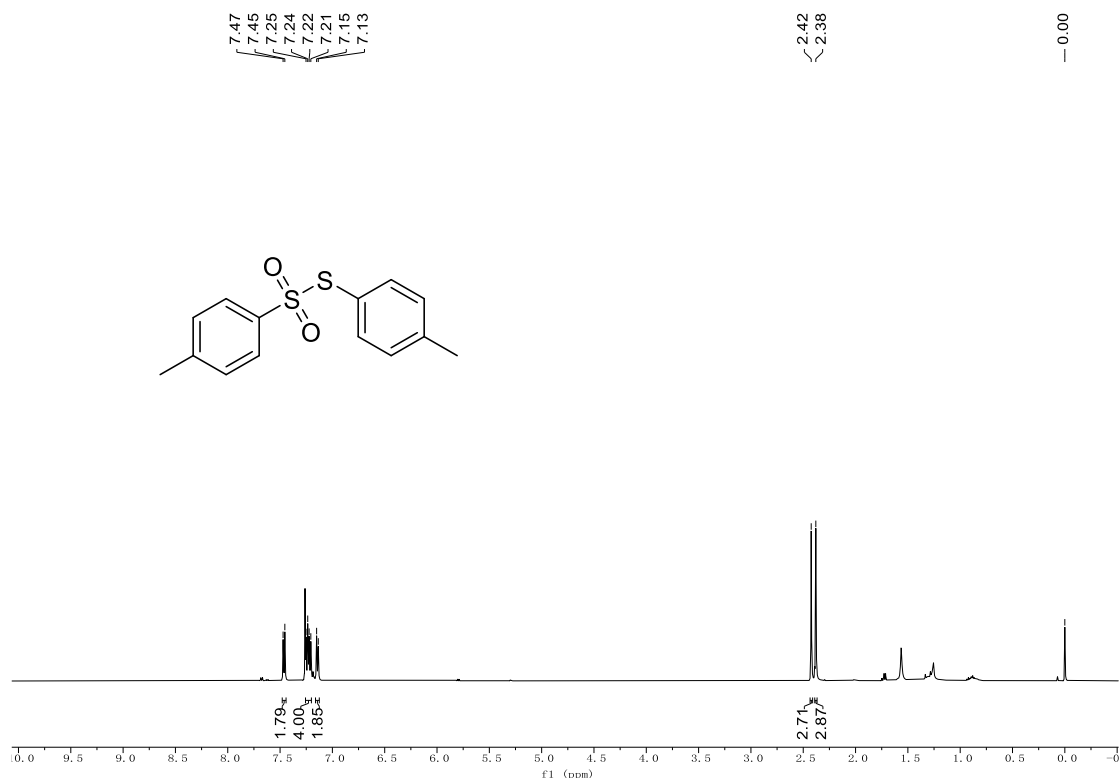

### 13. References

- [1] D. R. Stuart, M Bertrand-Laperle, K. M. N. Burgess and K. Fagnou, *J. Am. Chem. Soc.*, 2008, **130**, 16474-16475.
- [2] (a) Y. Yuan, Y.-M. Cao, Y.-P. Lin, Y.-L. Li, Z.-L. Huang and A.-W. Lei, *ACS Catalysis.*, 2018, **8**, 10871-10875; (b) M.-M. Li, L. Cheng, L.-J. Xiao, J.-H. Xie and Q.-L. Zhou, *Angew. Chem. Int. Ed.*, 2021, **60**, 2948-2951; (c) L.-X. Liu, K. Sun, L.-B. Su, J.-Y. Dong, L. Cheng, X.-D. Zhu, C.-T. Au, Y.-B. Zhou and S.-F. Yin, *Org. Lett.*, 2018, **20**, 4023-4027.
- [3] L.-B. Zhang, R.-S. Geng, Z.-C. Wang, G.-Y. Ren, L.-R. Wen and M. Li, *Green Chem.*, 2020, **22**, 16-21.
- [4] (a) W.-B. Du, N.-N. Wang, C. Pan, S.-F. Ni, L.-R. Wen, M. Li and L.-B. Zhang, *Green Chem.*, 2021, **23**, 2420-2426; (b) H.-D. Tian, Z.-H. Fu, C. Li, H.-C. Lin, M. Li, S.-F. Ni, L.-R. Wen and L.-B. Zhang, *Org. Lett.*, 2022, **24**, 9322-9326; (c) Q. Ma, M. Li, Z. Chen, S.-F. Ni, J. S. Wright, L.-R. Wen and L.-B. Zhang, *Green Chem.*, 2022, **24**, 4425-4431; (d) R.-T. Li, D.-F. Yuan, M.-Q. Ping, Y.-Y. Zhu, S.-F. Ni, M. Li, L.-R. Wen and L.-B. Zhang, *Chem. Sci.*, 2022, **13**, 9940-9946.

## The completed references in manuscript

Other citations of ref. 1 in the manuscript: (c) J. Aziz, E. Brachet, A. Hamze, J. F. Peyrat, G. Bernadat, E. Morvan, J. Bignon, J. Wdzieczak-Bakala, D. Desravines, J. Dubois, M. Tueni, A. Yassine, J. D. Brion and M. Alami, *Org. Biomol. Chem.*, 2013, **11**, 430-442; (d) A. Schreivogel, J. Maurer, R. Winter, A. Baro and S. Laschat, *Eur. J. Org. Chem.*, 2006, **2006**, 3395-3404; (e) M. L. Beer, J. Lemon and J. F. Valliant, *J. Med. Chem.*, 2010, **53**, 8012-8020.

Other citations of ref. 2 in the manuscript: (d) Z.-Y. Lin, W.-T. Hu, L.-C. Zhang and C. Wang, *ACS Catal.*, 2023, **13**, 6795–6803; (e) P. Polák, H. Váňová, D. Dvořák and T. Tobrman, *Tetrahedron Lett.*, 2016, **57**, 3684-3693; (f) M. G. Suero, E. D. Bayle, B. S. L. Collins and M. J. Gaunt, *J. Am. Chem. Soc.*, 2013, **135**, 5332–5335; (g) M. F. Wisthoff, S. B. Pawley, A. P. Cinderella and D. A. Watson, *J. Am. Chem. Soc.*, 2020, **142**, 12051–12055.

Other citations of ref. 3 in the manuscript: (d) C. A. Zificsak, Y. Shen, J. G. Lisko, J. P. Theroff, X.-G. Lao, O. Bollt, X.-F. Li, B. D. Dorsey and S. K. Kuwada, *Bioorg. Med. Chem. Lett.*, 2012, **22** 1850-1853; (e) M. Feng, B. Tang, S. Liang and X. Jiang, *Curr. Top. Med. Chem.*, 2018, **376**, 5-5.

Other citations of ref. 4 in the manuscript: (d) X.-H. Wang, W. Zhou, W.-L. Xie, Q. Chen and J. Wu, *Chin. Chem. Lett.*, 2023, **34**, 107984-107984; (e) X.-H. Wang, Q.-P. Ding, C.-X. Yang, J.-G. Yang and J. Wu, *Org. Chem. Front.*, 2023, **10**, 92-98; (f) D.-Q. Zheng, J.-Y. Yu and J. Wu, *Angew. Chem. Int. Ed.*, 2016, **55**, 11925-11929; (g) Z.- C. Chen, H. Zhang, S.-F. Zhou and X.-L. Cui, *Org. Lett.*, 2021, **23**, 7992–7995; (h) Y.-Q. Liang, Y.-X. Xin, Z.-J. Cai and S.-J. Ji, *Chem. Commun.*, 2022, **58**, 10206-10209.

Other citations of ref. 5 in the manuscript: (d) M.-B. Jiang, Y. Yuan, T. Wang, Y.-K. Xiong, J. Li, H.-J. Guo and A.-W. Lei, *Chem. Commun.*, 2019, **55**, 13852-13855; (e) Y.-R. Xu, S.-C. Wang, Z. Liu, M. Guo and A.-W. Lei, *Chem. Commun.*, 2023, **59**, 3707-3710; (f) X. Luo, S.-C. Wang and A.-W. Lei, *Adv. Synth. Catal.*, 2022, **364**, 1016-1022; (g) J.-Y. Zhu, Z.-Y. Chen, M. He, D.-X. Wang, L.-S. Li, J.-C. Qi, R.-Y. Shi and A.-W. Lei, *Org. Chem. Front.*, 2021, **8**, 3815-3819; (h) Y.-M. Cao, Y. Yuan, Y.-P. Lin, X.-M.

Jiang, Y.-Q. Weng, T.-W. Wang, F.-X. Bu, L. Zeng and A.-W. Lei, *Green Chem.*, 2020, **22**, 1548-1552.

Other citations of ref. 7 in the manuscript: (d) M. Yan, Y. Kawamata and P. S. Baran, *Chem. Rev.*, 2017, **117**, 13230-13319; (e) L. F. T. Novaes, J.-J. Liu, Y.-F. Shen, L.-X. Lu, J. M. Meinhardt and S. Lin, *Chem. Soc. Rev.*, 2021, **50**, 7941-7941; (f) C.-J. Zhu, N. W. J. Ang, T. H. Meyer, Y. Qiu and L. Ackermann, *ACS Cent. Sci.*, 2021, **7**, 415-431.

Other citations of ref. 8 in the manuscript: (d) M. Saito, Y. Kawamata, M. Meanwell, R. Navratil, D. Chiodi, E. Carlson, P.-F. Hu, L.-R. Chen, S. Udyavara, C. Kingston, M. Tanwar, S. Tyagi, B. P. Mckillican, M. G. Gichinga, M. A. Schmidt, M. D. Eastgate, M. Lamberto, C. He, T.-H. Tang, C. A. Malapit, M. S. Sigman, S. D. Minter, M. Neurock and P. S. Baran, *J. Am. Chem. Soc.*, 2021, **143**, 7859–7867; (e) T. V. Munchow, S. Dana, Y. Xu, B.-B. Yuan and L. Ackermann, *Science.*, 2023, **379**, 1036-1042; (f) C.-Y. Cai, X.-L. Lai, Y. Wang, H.-H. Hu, J.-S. Song, Y. Yang, C. Wang and H.-C. Xu, *Nat. Catal.*, 2022, **5**, 943-951.

Other citations of ref. 9 in the manuscript: (d) F. Carvalhal, M. Correia-da-Silva, E. Sousa, M. Pinto and A. Kijjoa, *J. Mol. Endocrinol*, 2018, **61**, T211-T231.

Other citations of ref. 10 in the manuscript: (d) D. M. Gill, L. Male and A. M. Jones, *Chem. Commun.*, 2019, **55**, 4319-4319; (e) D. Gorelik, Y.-C. Lin, A. I. Briceno-Strocchia and M. S. Taylor, *J. Org. Chem.*, 2019, **84**, 900–908; (f) C. Liu, C.-J. Yang, S. Hwang, S. L. Ferraro, J. P. Flynn and J. Niu, *Angew. Chem. Int. Ed.*, 2020, **59**, 18435-18441.

Other citations of ref. 11 in the manuscript: (d) W.-B. Du, N.-N. Wang, C. Pan, S.-F. Ni, L.-R. Wen, M. Li and L.-B. Zhang, *Green Chem.*, 2021, **23**, 2420-2426; (e) M.-Q. Ping, M.-Z. Guo, R.-T. Li, Z.-C. Wang, C. Ma, L.-R. Wen, S.-F. Ni, W.-S. Guo, M. Li and L.-B. Zhang, *Org. Lett.*, 2022, **24**, 7410–7415; (f) Z.-C. Wang, R.-T. Li, Q. Ma, J.-Y. Chen, S.-F. Ni, L.-R. Wen, M. Li and L.-B. Zhang, *Green Chem.*, 2021, **23**, 9515-9522; (g) L.-B. Zhang, R.-S. Geng, Z.-C. Wang, G.-Y. Ren, L.-R. Wen and M. Li, *Green Chem.*, 2020, **22**, 16-21.

Other citations of ref. 13 in the manuscript: (c) K. Brömmel, S. Maskri, I. Maisuls, C. P. Konken, M. Rieke, Z. Pethő, C. A. Strassert, O. Koch, A. Schwab and B. Wunsch, *Angew. Chem. Int. Ed.*, 2020, **59**, 8277-8284.

## 14. Characterization of products

### (E)-1-phenyl-2-tosylprop-1-en-1-yl sulfate tetrabutylammonium (**3aa**)

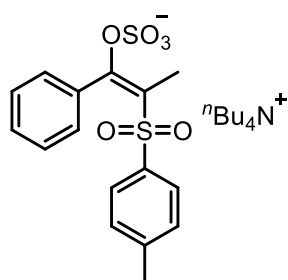

**3aa** was obtained in 72% (87.7 mg) as a canary yellow oil after column chromatography (eluent: ethyl acetate, Rf = 0.2).

**<sup>1</sup>H NMR (500 MHz, CDCl<sub>3</sub>):** δ 7.40 – 7.38 (m, 4H), 7.27 (m, 1H), 7.19 (t, *J* = 7.5 Hz, 2H), 7.12 (d, *J* = 8.0 Hz, 2H), 3.06 – 3.03 (m, 8H), 2.35 (s, 3H), 2.26 (s, 3H), 1.51 – 1.45 (m, 8H), 1.34 – 1.27 (m, 8H), 0.93 (t, *J* = 7.3 Hz, 12H).

**<sup>13</sup>C NMR (125 MHz, CDCl<sub>3</sub>):** δ 157.9, 143.2, 138.7, 135.0, 130.6, 129.1, 128.7, 128.60, 127.4, 126.6, 58.5, 23.8, 21.4, 19.6, 14.5, 13.6.

**HRMS (ESI-TOF) m/z:** Calcd for C<sub>16</sub>H<sub>15</sub>O<sub>6</sub>S<sub>2</sub><sup>-</sup>: 367.0316, found 367.0313.

### (E)-1-(o-tolyl)-2-tosylprop-1-en-1-yl sulfate tetrabutylammonium (**3ba**)

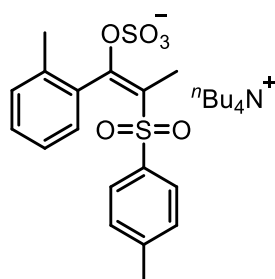

**3ba** was obtained in 51% (63.6 mg) as a yellow oil after column chromatography (eluent: ethyl acetate, Rf = 0.2).

**<sup>1</sup>H NMR (500 MHz, CDCl<sub>3</sub>):** δ 7.36 – 7.32 (m, 3H), 7.17 (t, *J* = 7.5 Hz, 1H), 7.11 (d, *J* = 7.9 Hz, 2H), 7.04 (t, *J* = 7.5 Hz, 1H), 6.96 (d, *J* = 7.5 Hz, 1H), 3.07 – 3.04 (m, 8H), 2.36 (s, 3H), 2.29 (s, 3H), 2.07 (s, 3H), 1.52 – 1.46 (m, 8H), 1.36 – 1.28 (m, 8H), 0.93 (t, *J* = 7.3 Hz, 12H).

$^{13}\text{C}$  NMR (125 MHz,  $\text{CDCl}_3$ ):  $\delta$  157.8, 143.2, 138.6, 137.9, 133.7, 132.1, 129.0, 128.8, 128.4, 127.4, 123.8, 58.5, 23.8, 21.5, 19.8, 19.6, 14.0, 13.6.

HRMS (ESI-TOF)  $m/z$ : Calcd for  $\text{C}_{17}\text{H}_{17}\text{O}_6\text{S}_2^-$ : 381.0472, found 381.0464.

**(E)-1-(m-tolyl)-2-tosylprop-1-en-1-yl sulfate tetrabutylammonium (3ca)**

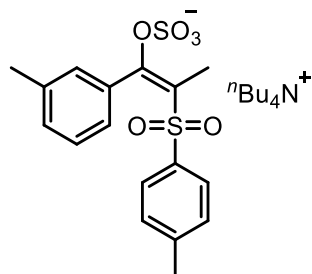

**3ca** was obtained in 55% (68.6 mg) as a colorless oil after column chromatography (eluent: ethyl acetate,  $R_f$  = 0.2).

$^1\text{H}$  NMR (500 MHz,  $\text{CDCl}_3$ ):  $\delta$  7.36 (d,  $J$  = 8.2 Hz, 3H), 7.21 (d,  $J$  = 7.3 Hz, 1H), 7.10 – 7.05 (m, 5H), 3.11 – 3.03 (m, 8H), 2.35 (s, 3H), 2.28 (s, 3H), 2.22 (s, 3H), 1.58 – 1.46 (m, 8H), 1.35 – 1.28 (m, 8H), 0.93 (t,  $J$  = 7.3 Hz, 12H).

$^{13}\text{C}$  NMR (125 MHz,  $\text{CDCl}_3$ ):  $\delta$  157.9, 143.0, 138.7, 135.9, 134.6, 130.9, 129.5, 129.1, 129.0, 128.0, 127.4, 126.5, 58.5, 23.8, 21.4, 21.3, 19.6, 14.5, 13.6.

HRMS (ESI-TOF)  $m/z$ : Calcd for  $\text{C}_{17}\text{H}_{17}\text{O}_6\text{S}_2^-$ : 381.0472, found 381.0474.

**(E)-1-(p-tolyl)-2-tosylprop-1-en-1-yl sulfate tetrabutylammonium (3da)**

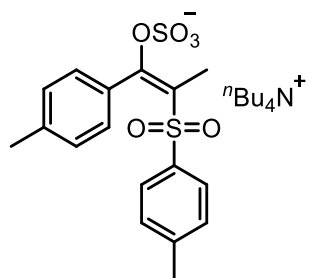

**3da** was obtained in 60% (74.8 mg) as a yellow oil after column chromatography (eluent: ethyl acetate,  $R_f$  = 0.2).

$^1\text{H}$  NMR (500 MHz,  $\text{CDCl}_3$ ):  $\delta$  7.42 (d,  $J$  = 8.1 Hz, 2H), 7.28 (d,  $J$  = 3.9 Hz, 2H), 7.12 (d,  $J$  = 8.0 Hz, 2H), 7.00 (d,  $J$  = 7.7 Hz, 2H), 3.10 – 3.07 (m, 8H), 2.36 (s, 3H), 2.30 (s, 3H), 2.21 (s, 3H), 1.54 – 1.48 (m, 8H), 1.37 – 1.29 (m, 8H), 0.94 (t,  $J$  = 7.3 Hz, 12H).

$^{13}\text{C}$  NMR (125 MHz,  $\text{CDCl}_3$ ):  $\delta$  157.5, 143.3, 138.9, 138.3, 131.5, 130.5, 129.1, 128.7, 127.54, 127.50, 58.5, 23.8, 21.5, 19.6, 14.5, 13.6.



**HRMS (ESI-TOF) m/z:** Calcd for  $C_{17}H_{17}O_6S_2^-$ : 381.0472, found 381.0473.

**(E)-1-(4-propylphenyl)-2-tosylprop-1-en-1-yl sulfate tetrabutylammonium (3ea)**

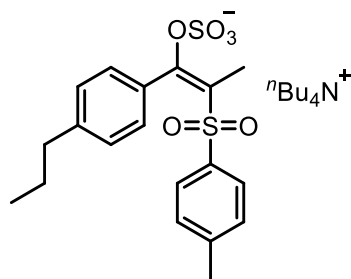

**3ea** was obtained in 50% (65.1 mg) as a colorless oil after column chromatography (eluent: ethyl acetate,  $R_f = 0.2$ ).

**$^1H$  NMR (500 MHz,  $CDCl_3$ ):**  $\delta$  7.35 (d,  $J = 8.4$  Hz, 2H), 7.28 – 7.26 (m, 2H), 7.07 (d,  $J = 8.6$  Hz, 2H), 6.97 (d,  $J = 8.5$  Hz, 2H), 3.10 – 3.07 (m, 8H), 2.54 – 2.51 (m, 2H), 2.33 (s, 3H), 2.27 (s, 3H), 1.62 (q,  $J = 7.3$  Hz, 2H), 1.54 – 1.48 (m, 8H), 1.36 – 1.29 (m, 8H), 0.94 (m, 15H).

**$^{13}C$  NMR (125 MHz,  $CDCl_3$ ):**  $\delta$  157.8, 143.5, 143.0, 138.5, 131.8, 130.5, 129.1, 129.0, 127.4, 126.8, 58.5, 38.0, 24.4, 23.8, 21.5, 19.6, 14.6, 14.0, 13.6.

**HRMS (ESI-TOF) m/z:** Calcd for  $C_{19}H_{21}O_6S_2^-$ : 409.0785, found 409.0785.

**(E)-1-(4-(tert-butyl)phenyl)-2-tosylprop-1-en-1-yl sulfate tetrabutylammonium**

**(3fa)**

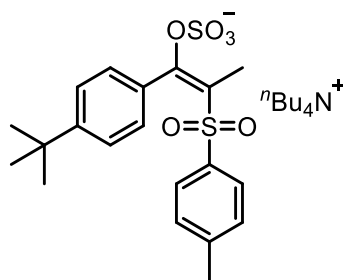

**3fa** was obtained in 60% (79.8 mg) as a yellow oil after column chromatography (eluent: ethyl acetate,  $R_f = 0.2$ ).

**$^1H$  NMR (500 MHz,  $CDCl_3$ ):**  $\delta$  7.30 – 7.25 (m, 4H), 7.13 (d,  $J = 8.4$  Hz, 2H), 7.01 (d,  $J = 8.0$  Hz, 2H), 3.13 – 3.10 (m, 8H), 2.32 (s, 3H), 2.31 (s, 3H), 1.56 – 1.50 (m, 8H), 1.38 – 1.32 (m, 8H), 1.28 (s, 9H), 0.94 (t,  $J = 7.3$  Hz, 12H).

**$^{13}C$  NMR (125 MHz,  $CDCl_3$ ):**  $\delta$  157.3, 151.8, 142.9, 138.3, 131.2, 130.3, 130.1, 128.9, 127.3, 123.8, 58.5, 34.6, 31.3, 23.8, 21.4, 19.6, 14.4, 13.6.

**HRMS (ESI-TOF) m/z:** Calcd for C<sub>20</sub>H<sub>23</sub>O<sub>6</sub>S<sub>2</sub><sup>-</sup>: 423.0938, found 423.0942.

**(E)-1-(4-butylphenyl)-2-tosylprop-1-en-1-yl sulfate tetrabutylammonium (3ga)**

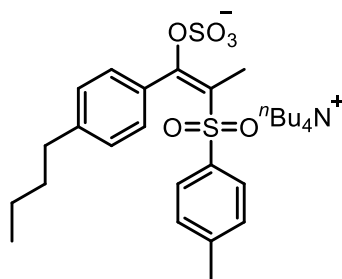

**3ga** was obtained in 61% (81.2 mg) as a yellow oil after column chromatography (eluent: ethyl acetate, R<sub>f</sub> = 0.2).

**<sup>1</sup>H NMR (500 MHz, CDCl<sub>3</sub>):** δ 7.35 (d, *J* = 8.2 Hz, 2H), 7.29 – 7.26 (m, 2H), 7.06 (d, *J* = 8.0 Hz, 2H), 6.96 (d, *J* = 8.1 Hz, 2H), 3.10 – 3.07 (m, 8H), 2.55 (t, *J* = 7.8 Hz, 2H), 2.33 (s, 3H), 2.29 (s, 3H), 1.58 (t, *J* = 7.7 Hz, 2H), 1.54 – 1.47 (m, 8H), 1.40 – 1.28 (m, 10H), 0.96 – 0.92 (m, 15H).

**<sup>13</sup>C NMR (125 MHz, CDCl<sub>3</sub>):** δ 157.9, 143.6, 143.0, 138.6, 131.9, 130.5, 128.9, 127.3, 126.7, 58.4, 35.6, 33.5, 23.8, 22.5, 21.5, 19.6, 14.6, 14.0, 13.6.

**HRMS (ESI-TOF) m/z:** Calcd for C<sub>20</sub>H<sub>23</sub>O<sub>6</sub>S<sub>2</sub><sup>-</sup>: 423.0942, found 423.0937.

**(E)-1-(4-ethylphenyl)-2-tosylprop-1-en-1-yl sulfate tetrabutylammonium (3ha)**

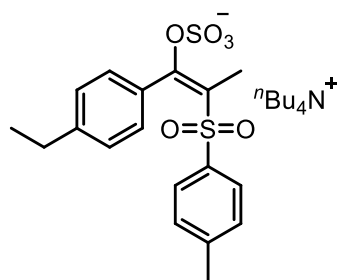

**3ha** was obtained in 68% (86.7 mg) as a yellow oil after column chromatography (eluent: ethyl acetate, R<sub>f</sub> = 0.2).

**<sup>1</sup>H NMR (500 MHz, CDCl<sub>3</sub>):** δ 7.37 (d, *J* = 8.2 Hz, 2H), 7.29 (d, *J* = 7.6 Hz, 2H), 7.08 (d, *J* = 8.0 Hz, 2H), 7.00 (d, *J* = 7.8 Hz, 2H), 3.13 – 3.06 (m, 8H), 2.60 (q, *J* = 7.6 Hz, 2H), 2.34 (s, 3H), 2.27 (s, 3H), 1.54 – 1.48 (m, 8H), 1.37 – 1.29 (m, 8H), 1.22 (t, *J* = 7.6 Hz, 3H), 0.94 (t, *J* = 7.3 Hz, 12H).

**<sup>13</sup>C NMR (125 MHz, CDCl<sub>3</sub>):** δ 158.0, 144.8, 143.0, 138.6, 132.1, 130.6, 129.0, 128.7, 127.4, 126.2, 58.5, 28.8, 23.8, 21.5, 19.6, 15.4, 14.6, 13.6.

**HRMS (ESI-TOF) m/z:** Calcd for C<sub>18</sub>H<sub>19</sub>O<sub>6</sub>S<sub>2</sub><sup>-</sup>: 395.0629, found 395.0635.

**(E)-1-(4-chlorophenyl)-2-tosylprop-1-en-1-yl sulfate tetrabutylammonium (3ia)**

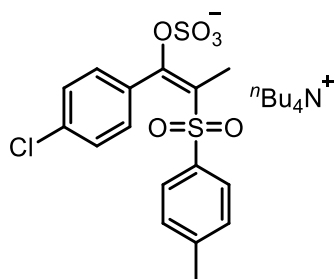

**3ia** was obtained in 59% (75.9 mg) as a yellow oil after column chromatography (eluent: ethyl acetate, R<sub>f</sub> = 0.2).

**<sup>1</sup>H NMR (500 MHz, CDCl<sub>3</sub>):** δ 7.43 (d, *J* = 8.3 Hz, 2H), 7.36 (d, *J* = 8.4 Hz, 2H), 7.18 – 7.15 (m, 4H), 3.08 – 3.05 (m, 8H), 2.38 (s, 3H), 2.23 (s, 3H), 1.54 – 1.48 (m, 8H), 1.37 – 1.29 (m, 8H), 0.94 (t, *J* = 7.3 Hz, 12H).

**<sup>13</sup>C NMR (125 MHz, CDCl<sub>3</sub>):** δ 156.4, 143.6, 138.3, 134.7, 133.4, 132.1, 129.2, 128.9, 127.4, 126.9, 58.5, 23.8, 21.5, 19.6, 14.4, 13.6.

**HRMS (ESI-TOF) m/z:** Calcd for C<sub>14</sub>H<sub>16</sub>ClO<sub>6</sub>S<sub>2</sub><sup>-</sup>: 400.9926, found 400.9918.

**(E)-1-(3-chlorophenyl)-2-tosylprop-1-en-1-yl sulfate tetrabutylammonium (3ja)**

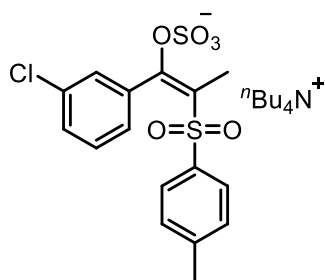

**3ja** was obtained in 58% (74.6 mg) as a yellow oil after column chromatography (eluent: ethyl acetate, R<sub>f</sub> = 0.2).

**<sup>1</sup>H NMR (500 MHz, CDCl<sub>3</sub>):** δ 7.40 (d, *J* = 8.0 Hz, 2H), 7.34 (d, *J* = 7.8 Hz, 1H), 7.24 – 7.21 (m, 2H), 7.16 (t, *J* = 8.1 Hz, 3H), 3.09 – 3.06 (m, 8H), 2.38 (s, 3H), 2.28 (s, 3H), 1.54 – 1.48 (m, 8H), 1.36 – 1.29 (m, 8H), 0.94 (t, *J* = 7.3 Hz, 12H).

**<sup>13</sup>C NMR (125 MHz, CDCl<sub>3</sub>):** δ 155.9, 143.6, 138.3, 136.7, 132.3, 130.3, 129.9, 129.22, 129.19, 128.7, 128.0, 127.4, 58.5, 23.8, 21.5, 19.6, 14.4, 13.6.

**HRMS (ESI-TOF) m/z:** Calcd for C<sub>16</sub>H<sub>14</sub>ClO<sub>6</sub>S<sub>2</sub><sup>-</sup>: 400.9926, found 400.9919.

**(E)-2-tosyl-1-(4-(trifluoromethyl)phenyl)prop-1-en-1-yl sulfate tetrabutylammonium (3ka)**

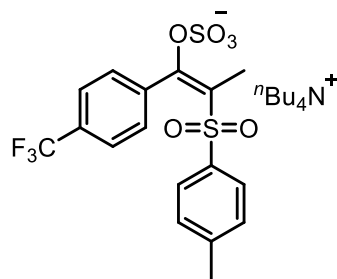

**3ka** was obtained in 38% (51.5 mg) as a yellow oil after column chromatography (eluent: ethyl acetate,  $R_f = 0.2$ ).

**$^1\text{H}$  NMR (500 MHz,  $\text{CDCl}_3$ ):**  $\delta$  7.54 (d,  $J = 8.0$  Hz, 2H), 7.45 (d,  $J = 8.2$  Hz, 2H), 7.41 (d,  $J = 8.2$  Hz, 2H), 7.13 (d,  $J = 8.1$  Hz, 2H), 3.11 – 3.08 (m, 8H), 2.36 (s, 3H), 2.28 (s, 3H), 1.56 – 1.50 (m, 8H), 1.38 – 1.31 (m, 8H), 0.95 (t,  $J = 7.3$  Hz, 12H).

**$^{13}\text{C}$  NMR (125 MHz,  $\text{CDCl}_3$ ):**  $\delta$  156.0, 143.6, 138.7, 138.2, 133.6, 131.0, 130.1, 129.7, 129.2, 129.1, 128.3, 127.4, 127.3, 123.51, 123.47, 58.6, 23.8, 21.4, 19.5, 14.3, 13.5.

**$^{19}\text{F}$  NMR (376 MHz,  $\text{CDCl}_3$ ):**  $\delta$  -63.26.

**HRMS (ESI-TOF)  $m/z$ :** Calcd for  $\text{C}_{17}\text{H}_{14}\text{F}_3\text{O}_6\text{S}_2^-$ : 435.0189, found 435.0178.

**(E)-1-(3-fluorophenyl)-2-tosylprop-1-en-1-yl sulfate tetrabutylammonium (3la)**

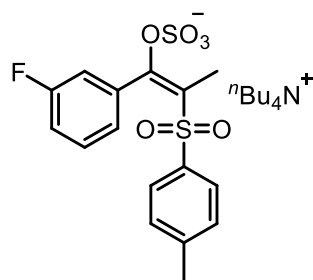

**3la** was obtained in 48% (60.2 mg) as a yellow oil after column chromatography (eluent: ethyl acetate,  $R_f = 0.2$ ).

**$^1\text{H}$  NMR (500 MHz,  $\text{CDCl}_3$ ):**  $\delta$  7.43 (d,  $J = 6.3$  Hz, 2H), 7.22 – 7.15 (m, 4H), 7.07 (d,  $J = 9.3$  Hz, 1H), 6.98 – 6.94 (m, 1H), 3.12 – 3.08 (m, 8H), 2.37 (s, 3H), 2.25 (s, 3H), 1.56 – 1.50 (m, 8H), 1.38 – 1.31 (m, 8H), 0.96 (t,  $J = 7.3$  Hz, 12H).

**$^{13}\text{C}$  NMR (125 MHz,  $\text{CDCl}_3$ ):**  $\delta$  161.4, 159.4, 154.7, 142.5, 137.2, 135.8, 128.8, 128.2, 127.2, 126.5, 125.6, 116.6, 116.4, 114.7, 114.6, 57.6, 22.8, 20.5, 18.6, 13.4, 12.5.

**$^{19}\text{F}$  NMR (376 MHz,  $\text{CDCl}_3$ ):**  $\delta$  -114.9.

**HRMS (ESI-TOF) m/z:** Calcd for C<sub>16</sub>H<sub>14</sub>FO<sub>6</sub>S<sub>2</sub><sup>-</sup>: 385.0221, found 385.0224.

**(E)-1-([1,1'-biphenyl]-4-yl)-2-tosylprop-1-en-1-yl sulfate tetrabutylammonium**

**(3ma)**

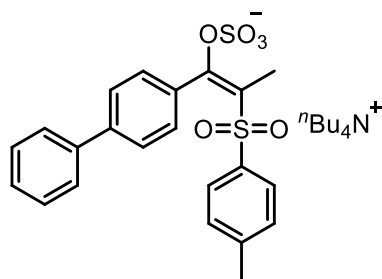

**3ma** was obtained in 52% (71.3 mg) as a yellow oil after column chromatography (eluent: ethyl acetate, R<sub>f</sub> = 0.2).

**<sup>1</sup>H NMR (500 MHz, CDCl<sub>3</sub>):** δ 7.55 (d, *J* = 7.6 Hz, 2H), 7.45 – 7.39 (m, 8H), 7.32 (t, *J* = 7.4 Hz, 1H), 7.07 (d, *J* = 8.0 Hz, 2H), 3.07 – 3.03 (m, 8H), 2.33 (s, 3H), 2.27 (s, 3H), 1.51 – 1.45 (m, 8H), 1.34 – 1.26 (m, 8H), 0.90 (t, *J* = 7.3 Hz, 12H).

**<sup>13</sup>C NMR (125 MHz, CDCl<sub>3</sub>):** δ 157.2, 143.2, 141.2, 140.74, 140.71, 138.5, 133.7, 131.2, 129.4, 129.0, 128.7, 127.4, 127.4, 127.0, 125.3, 58.5, 23.8, 21.5, 19.6, 14.5, 13.6.

**HRMS (ESI-TOF) m/z:** Calcd for C<sub>22</sub>H<sub>19</sub>O<sub>6</sub>S<sub>2</sub><sup>-</sup>: 443.0629, found 443.0627.

**(E)-1-phenyl-2-tosyl-5-(tosyloxy)pent-1-en-1-yl sulfate tetrabutylammonium (3na)**

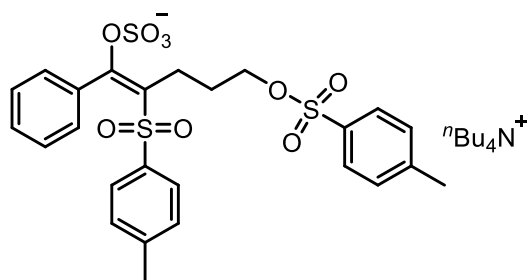

**3na** was obtained in 40% (64.6 mg) as a canary yellow oil after column chromatography (eluent: ethyl acetate, R<sub>f</sub> = 0.2).

**<sup>1</sup>H NMR (500 MHz, CDCl<sub>3</sub>):** δ 7.79 (d, *J* = 8.0 Hz, 2H), 7.34 (d, *J* = 7.9 Hz, 2H), 7.24 – 7.20 (m, 5H), 7.10 (t, *J* = 7.5 Hz, 2H), 7.02 (d, *J* = 8.0 Hz, 2H), 4.11 (t, *J* = 6.5 Hz, 2H), 3.08 – 3.04 (m, 8H), 2.78 – 2.74 (m, 2H), 2.44 (s, 3H), 2.32 (s, 3H), 2.10 (t, *J* = 7.7 Hz, 2H), 1.53 – 1.47 (m, 8H), 1.35 – 1.28 (m, 8H), 0.92 (t, *J* = 7.3 Hz, 12H).

**<sup>13</sup>C NMR (125 MHz, CDCl<sub>3</sub>):** δ 159.4, 144.7, 143.1, 138.7, 133.8, 132.9, 131.5, 130.8, 129.9, 129.0, 128.0, 127.3, 126.6, 71.2, 58.5, 28.4, 24.4, 23.8, 21.6, 21.4, 19.6, 13.6.

**HRMS (ESI-TOF) m/z:** Calcd for C<sub>25</sub>H<sub>25</sub>O<sub>9</sub>S<sub>2</sub><sup>-</sup>: 565.0666, found 565.0660.

**(E)-1-phenyl-2-(phenylsulfonyl)prop-1-en-1-yl sulfate tetrabutylammonium (3ab)**

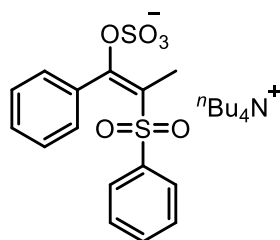

**3ab** was obtained in 60% (71.4 mg) as a canary yellow oil after column chromatography (eluent: ethyl acetate, R<sub>f</sub> = 0.2).

**<sup>1</sup>H NMR (500 MHz, CDCl<sub>3</sub>):** δ 7.53 – 7.51 (m, 2H), 7.46 – 7.43 (m, 1H), 7.42 – 7.39 (m, 2H), 7.32 (d, *J* = 8.1 Hz, 1H), 7.30 – 7.27 (m, 1H), 7.26 – 7.24 (m, 1H), 7.18 (t, *J* = 7.4 Hz, 2H), 3.12 – 3.08 (m, 8H), 2.31 (s, 1H), 1.57 – 1.49 (m, 8H), 1.40 – 1.30 (m, 8H), 0.96 (t, *J* = 7.3 Hz, 12H).

**<sup>13</sup>C NMR (125 MHz, CDCl<sub>3</sub>):** δ 158.3, 141.5, 134.8, 132.4, 130.6, 128.8, 128.47, 128.45, 127.3, 126.7, 58.5, 23.8, 19.6, 14.5, 13.6.

**HRMS (ESI-TOF) m/z:** Calcd for C<sub>15</sub>H<sub>13</sub>O<sub>6</sub>S<sub>2</sub><sup>-</sup>: 353.0159, found 353.0155.

**(E)-1-phenyl-2-((4-propylphenyl)sulfonyl)prop-1-en-1-yl sulfate tetrabutylammonium (3ac)**

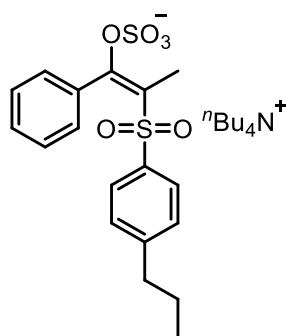

**3ac** was obtained in 70% (89.2mg) as a canary yellow oil after column chromatography (eluent: ethyl acetate, R<sub>f</sub> = 0.2).

**<sup>1</sup>H NMR (500 MHz, CDCl<sub>3</sub>):** δ 7.38 (m, 4H), 7.25 (t, *J* = 7.5 Hz, 1H), 7.17 (t, *J* = 7.5 Hz, 2H), 7.11 (d, *J* = 8.1 Hz, 2H), 3.07 – 3.04 (m, 8H), 2.58 (t, *J* = 7.6 Hz, 2H), 2.28 (s, 1H), 1.61 (q, *J* = 7.4 Hz, 2H), 1.52 – 1.46 (m, 8H), 1.35 – 1.28 (m, 8H), 0.94 – 0.91 (m, 15H).

**<sup>13</sup>C NMR (125 MHz, CDCl<sub>3</sub>):** δ 157.8, 147.8, 138.8, 134.9, 130.6, 128.8, 128.7, 128.5,

127.3, 126.6, 58.5, 37.8, 24.2, 23.8, 19.6, 14.5, 13.7, 13.6.

**HRMS (ESI-TOF) m/z:** Calcd for C<sub>18</sub>H<sub>19</sub>O<sub>6</sub>S<sub>2</sub><sup>-</sup>: 395.0629, found 395.0615.

**(E)-2-((4-(tert-butyl)phenyl)sulfonyl)-1-phenylprop-1-en-1-yl sulfate tetrabutylammonium (3ad)**

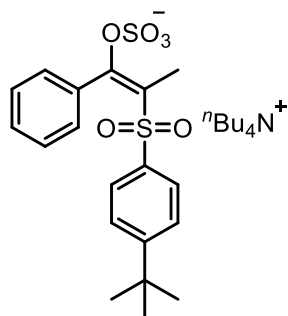

**3ad** was obtained in 71% (92.5 mg) as a canary yellow oil after column chromatography (eluent: ethyl acetate, R<sub>f</sub> = 0.2).

**<sup>1</sup>H NMR (500 MHz, CDCl<sub>3</sub>):** δ 7.43 (d, *J* = 8.6 Hz, 2H), 7.37 (d, *J* = 6.9 Hz, 2H), 7.31 (d, *J* = 8.7 Hz, 2H), 7.24 (t, *J* = 7.3 Hz, 1H), 7.16 (t, *J* = 7.6 Hz, 2H), 3.09 – 3.06 (m, 8H), 2.30 (s, 3H), 1.64 – 1.48 (m, 8H), 1.37 – 1.31 (m, 8H), 1.29 (s, 9H), 0.94 (t, *J* = 7.3 Hz, 12H).

**<sup>13</sup>C NMR (125 MHz, CDCl<sub>3</sub>):** δ 157.4, 156.1, 138.2, 134.6, 130.6, 129.2, 128.8, 127.2, 126.7, 125.5, 58.5, 35.0, 31.0, 23.8, 19.6, 14.4, 13.6.

**HRMS (ESI-TOF) m/z:** Calcd for C<sub>19</sub>H<sub>21</sub>O<sub>6</sub>S<sub>2</sub><sup>-</sup>: 409.0785, found 409.0775.

**(E)-2-(cyclopropylsulfonyl)-1-phenylprop-1-en-1-yl sulfate tetrabutylammonium (3ae)**

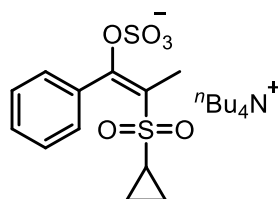

**3ae** was obtained in 40% (44.8 mg) as a canary yellow oil after column chromatography (eluent: ethyl acetate, R<sub>f</sub> = 0.2).

**<sup>1</sup>H NMR (500 MHz, CDCl<sub>3</sub>):** δ 7.58 (d, *J* = 7.3 Hz, 2H), 7.32 – 7.27 (m, 3H), δ 3.11 – 3.08 (m, 8H), 2.34 (s, 3H), 2.15 – 2.10 (m, 1H), 1.56 – 1.49 (m, 8H), 1.39 – 1.32 (m, 8H), 1.04 – 1.00 (m, 2H), 0.97 (t, *J* = 7.3 Hz, 12H), 0.82 – 0.80 (m, 2H).

**<sup>13</sup>C NMR (125 MHz, CDCl<sub>3</sub>):** δ 156.9, 135.1, 130.6, 129.0, 128.7, 126.9, 58.5, 31.5,

23.8, 19.6, 14.5, 13.6, 5.2.

**HRMS (ESI-TOF) m/z:** Calcd for C<sub>12</sub>H<sub>13</sub>O<sub>6</sub>S<sub>2</sub><sup>-</sup>: 317.0159, found 317.0150.

**(E)-2-((2-chlorophenyl)sulfonyl)-1-phenylprop-1-en-1-yl sulfate**

**tetrabutylammonium (3af)**

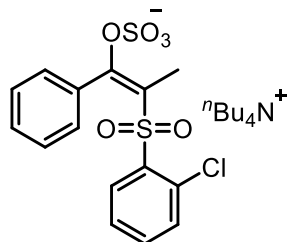

**3af** was obtained in 53% (66.7 mg) as a canary yellow oil after column chromatography (eluent: ethyl acetate, R<sub>f</sub> = 0.2).

**<sup>1</sup>H NMR (500 MHz, CDCl<sub>3</sub>):** δ 7.31 – 7.20 (m, 5H), 7.08 (t, *J* = 7.4 Hz, 1H), 6.97 (t, *J* = 7.5 Hz, 2H), 6.93 – 6.89 (m, 1H), 3.08 – 3.12 (m, 8H), 2.43 (s, 3H), 1.57 – 1.49 (m, 8H), 1.40 – 1.30 (m, 8H), 0.96 (t, *J* = 7.3 Hz, 12H).

**<sup>13</sup>C NMR (125 MHz, CDCl<sub>3</sub>):** δ 157.6, 138.9, 133.8, 132.9, 131.9, 130.8, 130.6, 130.5, 128.8, 128.7, 126.6, 126.2, 58.6, 23.8, 19.6, 13.6, 13.5.

**HRMS (ESI-TOF) m/z:** Calcd for C<sub>15</sub>H<sub>12</sub>ClO<sub>6</sub>S<sub>2</sub><sup>-</sup>: 386.9769, found 386.9760.

**(E)-2-((3-chlorophenyl)sulfonyl)-1-phenylprop-1-en-1-yl sulfate**

**tetrabutylammonium (3ag)**

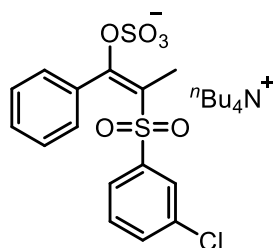

**3ag** was obtained in 51% (64.2 mg) as a yellow oil after column chromatography (eluent: ethyl acetate, R<sub>f</sub> = 0.2).

**<sup>1</sup>H NMR (500 MHz, CDCl<sub>3</sub>):** δ 7.41 (d, *J* = 7.8 Hz, 1H), 7.38 – 7.36 (m, 4H), 7.30 – 7.23 (m, 2H), 7.19 (t, *J* = 7.5 Hz, 2H), 3.14 – 3.10 (m, 8H), 2.34 (s, 3H), 1.58 – 1.51 (m, 8H), 1.37 (m, 8H), 0.97 (t, *J* = 7.3 Hz, 12H).

**<sup>13</sup>C NMR (125 MHz, CDCl<sub>3</sub>):** δ 158.9, 143.3, 134.4, 134.3, 132.5, 130.7, 129.8, 129.1, 128.4, 127.5, 126.7, 125.4, 58.5, 23.8, 19.6, 14.4, 13.6.



**HRMS (ESI-TOF) m/z:** Calcd for C<sub>15</sub>H<sub>12</sub>ClO<sub>6</sub>S<sub>2</sub><sup>-</sup>: 386.9769, found 386.9774.

**(E)-2-((4-chlorophenyl)sulfonyl)-1-phenylprop-1-en-1-yl sulfate  
tetrabutylammonium (3ah)**

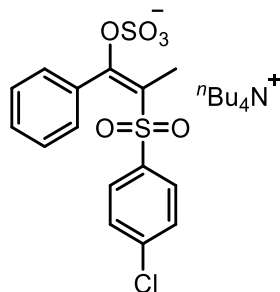

**3ah** was obtained in 52% (65.4 mg) as a yellow oil after column chromatography (eluent: ethyl acetate, R<sub>f</sub> = 0.2).

**<sup>1</sup>H NMR (500 MHz, CDCl<sub>3</sub>):** δ 7.40 (d, *J* = 8.6 Hz, 2H), 7.35 (d, *J* = 6.9 Hz, 1H), 7.29 – 7.25 (m, 3H), 7.18 (t, *J* = 7.5 Hz, 2H), 3.08 – 3.05 (m, 8H), 2.30 (s, 3H), 1.53 – 1.47 (m, 8H), 1.36 – 1.29 (m, 8H), 0.94 (t, *J* = 7.3 Hz, 12H).

**<sup>13</sup>C NMR (125 MHz, CDCl<sub>3</sub>):** δ 158.5, 140.0, 138.8, 134.6, 130.6, 129.0, 128.7, 128.64, 128.60, 126.8, 58.5, 23.8, 19.6, 14.5, 13.6.

**HRMS (ESI-TOF) m/z:** Calcd for C<sub>15</sub>H<sub>12</sub>ClO<sub>6</sub>S<sub>2</sub><sup>-</sup>: 386.9769, found 386.9764.

**(E)-1-phenyl-2-((4-(trifluoromethoxy)phenyl)sulfonyl)prop-1-en-1-yl sulfate  
tetrabutylammonium (3ai)**

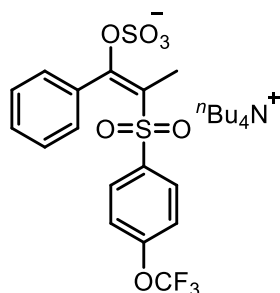

**3ai** was obtained in 50% (67.9 mg) as a colorless oil after column chromatography (eluent: ethyl acetate, R<sub>f</sub> = 0.2).

**<sup>1</sup>H NMR (500 MHz, CDCl<sub>3</sub>):** δ 7.49 (d, *J* = 8.8 Hz, 2H), 7.34 (d, *J* = 6.8 Hz, 2H), 7.25 (m, 1H), 7.15 (t, *J* = 7.6 Hz, 2H), 7.08 (d, *J* = 8.4 Hz, 2H), 3.10 – 3.07 (m, 8H), 2.35 (s, 3H), 1.55 – 1.48 (m, 8H), 1.37 – 1.33 (m, 8H), 0.94 (t, *J* = 7.3 Hz, 12H).

**<sup>13</sup>C NMR (125 MHz, CDCl<sub>3</sub>):** δ 158.6, 151.7, 140.0, 134.6, 130.6, 129.3, 128.9, 128.8,

126.8, 121.2, 120.3, 119.1, 58.5, 23.7, 19.5, 14.3, 13.5.

$^{19}\text{F}$  NMR (376 MHz,  $\text{CDCl}_3$ ):  $\delta$  -57.68.

HRMS (ESI-TOF)  $m/z$ : Calcd for  $\text{C}_{16}\text{H}_{12}\text{F}_3\text{O}_7\text{S}_2^-$ : 436.9982, found 436.9975.

**(E)-2-((2-fluorophenyl)sulfonyl)-1-phenylprop-1-en-1-yl sulfate tetrabutylammonium (3aj)**

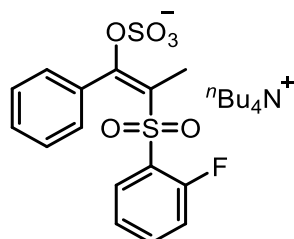

**3aj** was obtained in 50% (61.3 mg) as a canary yellow oil after column chromatography (eluent: ethyl acetate,  $R_f$  = 0.2).

$^1\text{H}$  NMR (500 MHz,  $\text{CDCl}_3$ ):  $\delta$  7.39 – 7.34 (m, 1H), 7.29 (d,  $J$  = 8.3 Hz, 2H), 7.20 – 7.15 (m, 2H), 7.07 (m, 3H), 7.03 – 6.99 (m, 1H), 6.87 (t,  $J$  = 7.3 Hz, 1H), 3.14 – 3.11 (m, 8H), 2.39 (s, 3H), 1.58 – 1.51 (m, 8H), 1.40 – 1.33 (m, 8H), 0.97 (t,  $J$  = 7.3 Hz, 12H).

$^{13}\text{C}$  NMR (125 MHz,  $\text{CDCl}_3$ ):  $\delta$  160.2, 158.6, 157.7, 134.7, 134.6, 134.0, 130.6, 129.7, 129.6, 129.4, 129.3, 128.8, 126.6, 123.63, 123.59, 116.5, 116.3, 58.5, 23.8, 19.6, 13.6.

$^{19}\text{F}$  NMR (376 MHz,  $\text{CDCl}_3$ ):  $\delta$  -108.50.

HRMS (ESI-TOF)  $m/z$ : Calcd for  $\text{C}_{15}\text{H}_{12}\text{FO}_6\text{S}_2^-$ : 371.0065, found 371.0059.

**(E)-1-phenyl-2-(pyridin-3-ylsulfonyl)prop-1-en-1-yl sulfate tetrabutylammonium (3ak)**

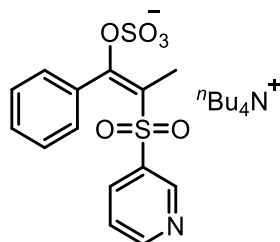

**3ak** was obtained in 52% (62.0 mg) as a yellow oil after column chromatography (eluent: ethyl acetate,  $R_f$  = 0.2).

$^1\text{H}$  NMR (500 MHz,  $\text{CDCl}_3$ ):  $\delta$  8.62 – 8.60 (m, 2H), 7.71 (d,  $J$  = 8.1 Hz, 1H), 7.34 (d,  $J$  = 7.6 Hz, 2H), 7.28 (m, 1H), 7.23 (m, 1H), 7.17 (t,  $J$  = 7.6 Hz, 2H), 3.12 – 3.08 (m,

8H), 2.36 (s, 3H), 1.56 – 1.49 (m, 8H), 1.37 – 1.30 (m, 8H), 0.94 (t,  $J = 7.3$  Hz, 12H).

$^{13}\text{C}$  NMR (125 MHz,  $\text{CDCl}_3$ ):  $\delta$  159.3, 152.7, 148.1, 138.2, 134.8, 134.4, 130.7, 129.1, 128.4, 126.8, 123.1, 58.5, 23.8, 19.6, 14.3, 13.6.

HRMS (ESI-TOF)  $m/z$ : Calcd for  $\text{C}_{14}\text{H}_{12}\text{NO}_6\text{S}_2^-$ : 354.0112, found 354.0103.

**(E)-2-((4-(methoxycarbonyl)phenyl)sulfonyl)-1-phenylprop-1-en-1-yl sulfate tetrabutylammonium (3al)**

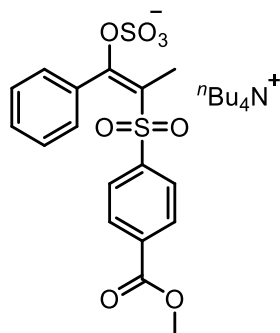

**3al** was obtained in 42% (54.9 mg) as a yellow oil after column chromatography (eluent: ethyl acetate,  $R_f = 0.2$ ).

$^1\text{H}$  NMR (500 MHz,  $\text{CDCl}_3$ ):  $\delta$  7.94 (d,  $J = 8.5$  Hz, 2H), 7.54 (d,  $J = 8.5$  Hz, 2H), 7.35 (d,  $J = 8.0$  Hz, 2H), 7.25 (d,  $J = 7.9$  Hz, 1H), 7.16 (t,  $J = 7.8$  Hz, 2H), 3.93 (s, 3H), 3.10 – 3.06 (m, 8H), 2.33 (s, 3H), 1.54 – 1.48 (m, 8H), 1.35 – 1.29 (m, 8H), 0.94 (t,  $J = 7.5$  Hz, 12H).

$^{13}\text{C}$  NMR (125 MHz,  $\text{CDCl}_3$ ):  $\delta$  165.7, 159.1, 145.7, 134.6, 133.3, 130.7, 129.5, 128.9, 128.1, 127.2, 126.7, 58.6, 52.5, 23.8, 19.6, 14.5, 13.6.

HRMS (ESI-TOF)  $m/z$ : Calcd for  $\text{C}_{17}\text{H}_{15}\text{O}_8\text{S}_2^-$ : 411.0214, found 411.0206.

**(E)-2-((4-cyanophenyl)sulfonyl)-1-phenylprop-1-en-1-yl sulfate tetrabutylammonium (3am)**

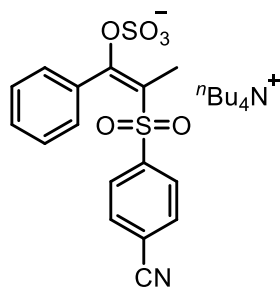

**3am** was obtained in 53% (65.8 mg) as a yellow oil after column chromatography (eluent: ethyl acetate,  $R_f = 0.2$ ).

**<sup>1</sup>H NMR (500 MHz, CDCl<sub>3</sub>):** δ 7.56 (s, 3H), 7.33 (d, *J* = 7.5 Hz, 2H), 7.29 – 7.25 (m, 2H), 7.16 (t, *J* = 7.5 Hz, 2H), 3.11 – 3.09 (m, 8H), 2.35 (s, 3H), 1.56 – 1.50 (m, 8H), 1.36 – 1.32 (m, 8H), 0.95 (t, *J* = 7.3 Hz, 12H).

**<sup>13</sup>C NMR (125 MHz, CDCl<sub>3</sub>):** δ 159.6, 146.0, 134.4, 132.0, 130.7, 129.1, 128.1, 127.8, 126.8, 117.5, 115.7, 58.6, 23.8, 19.6, 14.4, 13.6.

**HRMS (ESI-TOF) m/z:** Calcd for C<sub>16</sub>H<sub>12</sub>NO<sub>6</sub>S<sub>2</sub><sup>-</sup>: 378.0112, found 378.0104.

**(E)-2-((2,4-dichlorophenyl)sulfonyl)-1-phenylprop-1-en-1-yl sulfate tetrabutylammonium (3an)**

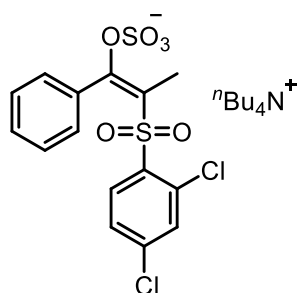

**3an** was obtained in 40% (53.1 mg) as a yellow oil after column chromatography (eluent: ethyl acetate, R<sub>f</sub> = 0.2).

**<sup>1</sup>H NMR (500 MHz, CDCl<sub>3</sub>):** δ 7.31 (s, 1H), 7.23 (d, *J* = 7.6 Hz, 2H), 7.17 – 7.12 (m, 2H), 7.02 (t, *J* = 7.6 Hz, 2H), 6.86 (d, *J* = 8.5 Hz, 1H), 3.12 – 3.08 (m, 8H), 2.41 (s, 3H), 1.56 – 1.50 (m, 8H), 1.39 – 1.32 (m, 8H), 0.96 (t, *J* = 7.2 Hz, 12H).

**<sup>13</sup>C NMR (125 MHz, CDCl<sub>3</sub>):** δ 157.6, 138.7, 137.6, 133.6, 132.9, 131.5, 130.53, 130.51, 129.1, 128.9, 126.7, 126.4, 58.6, 23.8, 19.6, 13.6, 13.4.

**HRMS (ESI-TOF) m/z:** Calcd for C<sub>15</sub>H<sub>11</sub>Cl<sub>2</sub>O<sub>6</sub>S<sub>2</sub><sup>-</sup>: 420.9380, found 420.9371.

**(E)-1-phenyl-2-tosylvinyl sulfate tetrabutylammonium (4aa)**

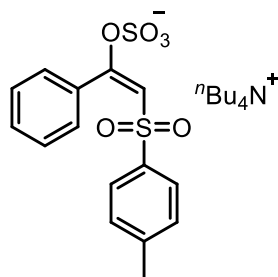

**4aa** was obtained in 51% (60.7 mg) as a canary yellow oil after column chromatography (eluent: ethyl acetate, R<sub>f</sub> = 0.2).

**<sup>1</sup>H NMR (500 MHz, CDCl<sub>3</sub>):** δ 7.43 (d, *J* = 7.8 Hz, 2H), 7.32 (t, *J* = 7.5 Hz, 3H), 7.20

(t,  $J = 7.5$  Hz, 2H), 7.06 (d,  $J = 8.2$  Hz, 3H), 3.13 – 3.10 (m, 8H), 2.31 (s, 3H), 1.55 – 1.49 (m, 8H), 1.37 – 1.29 (m, 8H), 0.93 (t,  $J = 7.4$  Hz, 12H).

$^{13}\text{C}$  NMR (125 MHz,  $\text{CDCl}_3$ ):  $\delta$  162.3, 143.0, 140.0, 133.2, 129.7, 129.5, 129.1, 127.3, 127.1, 113.7, 58.4, 23.7, 21.4, 19.6, 13.5.

HRMS (ESI-TOF)  $m/z$ : Calcd for  $\text{C}_{15}\text{H}_{13}\text{O}_6\text{S}_2^-$ : 353.0159, found 353.0159.

**(E)-1-(*o*-tolyl)-2-tosylvinyl sulfate tetrabutylammonium (4ba)**

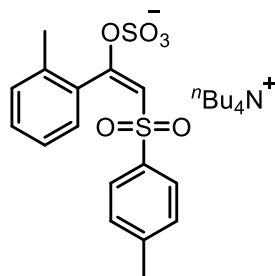

**4ba** was obtained in 37% (45.1 mg) as a canary yellow oil after column chromatography (eluent: ethyl acetate,  $R_f = 0.2$ ).

$^1\text{H}$  NMR (500 MHz,  $\text{CDCl}_3$ ):  $\delta$  7.28 (d, 1H), 7.21 (t,  $J = 7.5$  Hz, 1H), 7.10 – 7.05 (m, 5H), 6.99 (d,  $J = 7.7$  Hz, 1H), 3.13 – 3.10 (m, 8H), 2.35 (s, 3H), 1.98 (s, 3H), 1.56 – 1.49 (m, 8H), 1.38 – 1.30 (m, 8H), 0.94 (t,  $J = 7.3$  Hz, 12H).

$^{13}\text{C}$  NMR (125 MHz,  $\text{CDCl}_3$ ):  $\delta$  163.1, 143.0, 139.9, 137.4, 132.5, 130.0, 129.5, 129.4, 128.9, 127.3, 124.5, 114.0, 58.4, 23.7, 21.4, 19.6, 18.9, 13.6.

HRMS (ESI-TOF)  $m/z$ : Calcd for  $\text{C}_{16}\text{H}_{15}\text{O}_6\text{S}_2^-$ : 367.0316, found 367.0308.

**(E)-1-(4-ethylphenyl)-2-tosylvinyl sulfate tetrabutylammonium (4ca)**

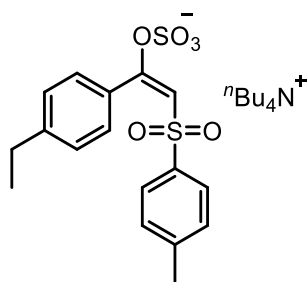

**4ca** was obtained in 32% (39.9mg) as a yellow oil after column chromatography (eluent: ethyl acetate,  $R_f = 0.2$ ).

$^1\text{H}$  NMR (500 MHz,  $\text{CDCl}_3$ ):  $\delta$  7.45 (d,  $J = 7.8$  Hz, 2H), 7.28 (m, 2H), 7.09 – 7.01 (m, 5H), 3.16 – 3.13 (m, 8H), 2.61 (q,  $J = 7.7$  Hz, 2H), 2.33 (s, 3H), 1.57 – 1.51 (m, 8H), 1.38 – 1.31 (m, 8H), 1.21 (t,  $J = 7.6$  Hz, 3H), 0.94 (t,  $J = 7.4$  Hz, 12H).

$^{13}\text{C}$  NMR (125 MHz,  $\text{CDCl}_3$ ):  $\delta$  162.5, 146.2, 142.9, 140.1, 130.6, 129.6, 129.0, 127.1, 126.8, 113.1, 58.4, 28.8, 23.8, 21.4, 19.6, 15.5, 13.6.

HRMS (ESI-TOF)  $m/z$ : Calcd for  $\text{C}_{17}\text{H}_{17}\text{O}_6\text{S}_2^-$ : 381.0472, found 381.0489.

**(E)-1-(4-propylphenyl)-2-tosylvinyl sulfate tetrabutylammonium (4da)**

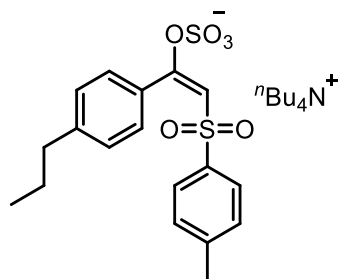

**4da** was obtained in 31% (39.5 mg) as a yellow oil after column chromatography (eluent: ethyl acetate,  $R_f$  = 0.2).

$^1\text{H}$  NMR (500 MHz,  $\text{CDCl}_3$ ):  $\delta$  7.44 (d,  $J$  = 7.9 Hz, 2H), 7.28 – 7.26 (m, 2H), 7.07 (d,  $J$  = 7.9 Hz, 2H), 7.02 (d,  $J$  = 8.2 Hz, 2H), 3.17 – 3.14 (m, 8H), 2.55 (t,  $J$  = 7.6 Hz, 2H), 2.33 (s, 3H), 1.63 – 1.52 (m, 10H), 1.39 – 1.32 (m, 8H), 0.96 – 0.91 (m, 15H).

$^{13}\text{C}$  NMR (125 MHz,  $\text{CDCl}_3$ ):  $\delta$  162.6, 144.6, 142.8, 140.1, 130.6, 129.5, 128.9, 127.4, 127.1, 113.1, 58.4, 37.9, 24.4, 23.8, 21.4, 19.6, 13.7, 13.6.

HRMS (ESI-TOF)  $m/z$ : Calcd for  $\text{C}_{18}\text{H}_{19}\text{O}_6\text{S}_2^-$ : 395.0629, found 395.0619.

**(E)-1-(4-(tert-butyl)phenyl)-2-tosylvinyl sulfate tetrabutylammonium (4ea)**

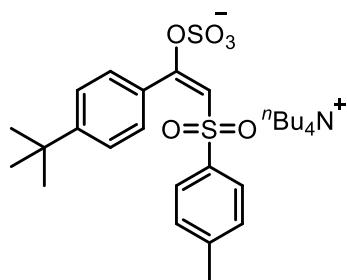

**4ea** was obtained in 35% (45.6 mg) as a yellow oil after column chromatography (eluent: ethyl acetate,  $R_f$  = 0.2).

$^1\text{H}$  NMR (500 MHz,  $\text{CDCl}_3$ ):  $\delta$  7.40 (d,  $J$  = 7.9 Hz, 2H), 7.29 – 7.25 (m, 2H), 7.19 (d,  $J$  = 7.9 Hz, 2H), 7.03 (d,  $J$  = 7.6 Hz, 3H), 3.18 – 3.14 (m, 8H), 2.31 (s, 3H), 1.59 – 1.52 (m, 8H), 1.39 – 1.32 (m, 8H), 1.28 (s, 9H), 0.94 (t,  $J$  = 7.3 Hz, 12H).

$^{13}\text{C}$  NMR (125 MHz,  $\text{CDCl}_3$ ):  $\delta$  162.6, 153.0, 142.7, 139.9, 130.3, 129.3, 128.8, 127.2, 124.2, 113.3, 58.4, 34.7, 31.2, 23.7, 21.4, 19.6, 13.6.

**HRMS (ESI-TOF) m/z:** Calcd for C<sub>19</sub>H<sub>21</sub>O<sub>6</sub>S<sub>2</sub><sup>-</sup>: 409.0785, found 409.0779.

**(E)-1-(2-fluorophenyl)-2-tosylvinyl sulfate tetrabutylammonium (4fa)**

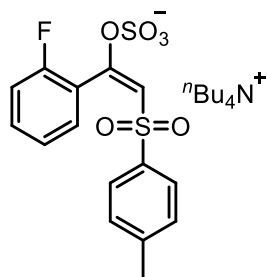

**4fa** was obtained in 40% (49.1 mg) as a yellow oil after column chromatography (eluent: ethyl acetate, R<sub>f</sub> = 0.2).

**<sup>1</sup>H NMR (500 MHz, CDCl<sub>3</sub>):** δ 7.42 (d, *J* = 7.8 Hz, 2H), 7.29 – 7.25 (m, 1H), 7.20 – 7.17 (m, 2H), 7.09 (d, *J* = 7.8 Hz, 2H), 7.02 – 6.97 (m, 2H), 6.87 (t, *J* = 8.9 Hz, 1H), 3.10 – 3.07 (m, 8H), 2.30 (s, 3H), 1.52 – 1.46 (m, 8H), 1.32 – 1.25 (m, 8H), 0.87 (t, *J* = 7.4 Hz, 12H).

**<sup>13</sup>C NMR (125 MHz, CDCl<sub>3</sub>):** δ 160.7, 158.7, 157.0, 143.2, 140.0, 131.4, 131.3, 129.2, 127.1, 123.3, 123.2, 121.9, 121.7, 115.1, 114.9, 114.4, 58.5, 23.8, 21.5, 19.6, 13.6.

**<sup>19</sup>F NMR (376 MHz, CDCl<sub>3</sub>):** δ -112.7.

**HRMS (ESI-TOF) m/z:** Calcd for C<sub>15</sub>H<sub>12</sub>FO<sub>6</sub>S<sub>2</sub><sup>-</sup>: 371.0065, found 371.0062.

**(E)-1-(3-chlorophenyl)-2-tosylvinyl sulfate tetrabutylammonium (4ga)**

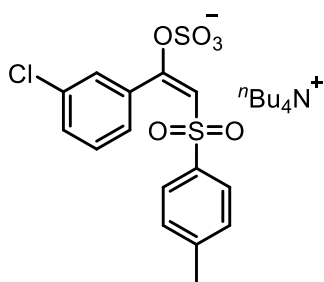

**4ga** was obtained in 42% (52.9 mg) as a yellow oil after column chromatography (eluent: ethyl acetate, R<sub>f</sub> = 0.2).

**<sup>1</sup>H NMR (500 MHz, CDCl<sub>3</sub>):** δ 7.47 (d, *J* = 8.3 Hz, 2H), 7.29 (m, 2H), 7.21 – 7.18 (m, 2H), 7.14 (d, *J* = 7.8 Hz, 2H), 7.06 (s, 1H), 3.16 – 3.12 (m, 8H), 2.37 (s, 3H), 1.59 – 1.52 (m, 8H), 1.39 – 1.32 (m, 8H), 0.95 (t, *J* = 7.4 Hz, 12H).

**<sup>13</sup>C NMR (125 MHz, CDCl<sub>3</sub>):** δ 160.2, 142.9, 139.3, 134.6, 132.8, 129.2, 128.74,

128.71, 128.2, 127.5, 126.6, 113.7, 58.0, 23.2, 21.0, 19.1, 13.1.

**HRMS (ESI-TOF) m/z:** Calcd for  $C_{15}H_{12}ClO_6S_2^-$ : 386.9769, found 386.9763.

**(E)-1-(4-bromophenyl)-2-tosylvinyl sulfate tetrabutylammonium (4ha)**

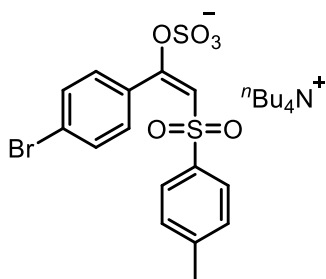

**4ha** was obtained in 47% (63.3 mg) as a yellow oil after column chromatography (eluent: ethyl acetate,  $R_f = 0.2$ ).

**$^1H$  NMR (500 MHz,  $CDCl_3$ ):**  $\delta$  7.49 (d,  $J = 8.2$  Hz, 2H), 7.37 (d,  $J = 8.4$  Hz, 2H), 7.28 – 7.25 (m, 2H), 7.15 (d,  $J = 7.9$  Hz, 2H), 7.02 (s, 1H), 3.16 – 3.12 (m, 8H), 2.36 (s, 3H), 1.58 – 1.52 (m, 8H), 1.39 – 1.31 (m, 8H), 0.94 (t,  $J = 7.3$  Hz, 12H).

**$^{13}C$  NMR (125 MHz,  $CDCl_3$ ):**  $\delta$  160.2, 142.4, 139.1, 131.5, 130.4, 129.6, 128.3, 126.1, 123.3, 112.9, 57.6, 22.9, 20.6, 18.7, 12.7.

**HRMS (ESI-TOF) m/z:** Calcd for  $C_{15}H_{12}BrO_6S_2^-$ : 430.9264, found 430.9254.

**(E)-1-(4-chlorophenyl)-2-tosylvinyl sulfate tetrabutylammonium (4ia)**

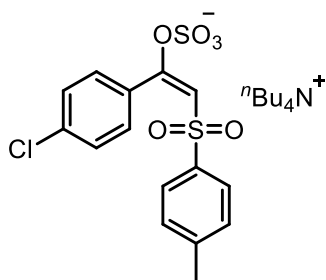

**4ia** was obtained in 49% (61.7 mg) as a yellow oil after column chromatography (eluent: ethyl acetate,  $R_f = 0.2$ ).

**$^1H$  NMR (500 MHz,  $CDCl_3$ ):**  $\delta$  7.49 (d,  $J = 7.9$  Hz, 2H), 7.33 (d,  $J = 8.1$  Hz, 2H), 7.22 (d,  $J = 8.5$  Hz, 2H), 7.15 (d,  $J = 7.9$  Hz, 2H), 7.02 (s, 1H), 3.15 – 3.12 (m, 8H), 2.36 (s, 3H), 1.58 – 1.52 (m, 8H), 1.38 – 1.31 (m, 8H), 0.94 (t,  $J = 7.3$  Hz, 12H).

**$^{13}C$  NMR (125 MHz,  $CDCl_3$ ):**  $\delta$  161.1, 143.3, 140.0, 135.8, 131.9, 131.0, 129.2, 127.6, 127.0, 113.8, 58.5, 23.8, 21.5, 19.6, 13.6.

**HRMS (ESI-TOF) m/z:** Calcd for  $C_{15}H_{12}ClO_6S_2^-$ : 386.9769, found 386.9763.



### 1-phenyl-2,5-ditosylpentan-1-one (5)

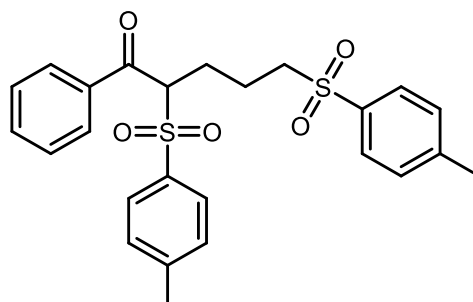

5 was obtained in 98% (46.1 mg) as yellow oil after column chromatography (eluent: petroleum ether/ethyl acetate = 2/1 v/v, R<sub>f</sub> = 0.2).

**<sup>1</sup>H NMR (500 MHz, CDCl<sub>3</sub>):** δ 7.90 (d, *J* = 7.0 Hz, 2H), 7.72 (d, *J* = 8.5 Hz, 2H), 7.62 – 7.59 (m, 3H), 7.46 (t, *J* = 7.8 Hz, 2H), 7.33 (d, *J* = 7.9 Hz, 2H), 7.29 (d, *J* = 7.8 Hz, 2H), 5.06 (dd, *J* = 10.4, 4.1 Hz, 1H), 3.94 (t, *J* = 6.2 Hz, 2H), 2.45 (s, 3H), 2.42 (s, 3H), 2.19 – 2.03 (m, 1H), 1.64 – 1.57 (m, 2H).

**<sup>13</sup>C NMR (125 MHz, CDCl<sub>3</sub>):** δ 192.1, 145.5, 145.0, 136.8, 134.1, 133.2, 132.7, 129.9, 129.7, 129.6, 129.1, 128.8, 127.9, 69.2, 69.0, 26.1, 24.5, 21.7, 21.6.

**HRMS (ESI-TOF, [M + Na]<sup>+</sup>):** Calcd for C<sub>25</sub>H<sub>26</sub>O<sub>6</sub>S<sub>2</sub>: 509.1068, found 509.1067.

### 5-azido-1-phenyl-2-tosylpentan-1-one (6)

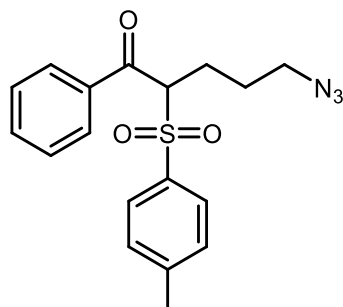

6 was obtained in 97% (69.3 mg) as a yellow oil after column chromatography (eluent: petroleum ether/ethyl acetate = 4/1 v/v, R<sub>f</sub> = 0.2).

**<sup>1</sup>H NMR (500 MHz, CDCl<sub>3</sub>):** δ 7.97 (d, *J* = 8.2 Hz, 2H), 7.62 (t, *J* = 8.9 Hz, 3H), 7.48 (t, *J* = 7.9 Hz, 2H), 7.30 (d, *J* = 8.0 Hz, 2H), 5.11 (dd, *J* = 10.6, 3.8 Hz, 1H), 3.29 – 3.20 (m, 2H), 2.43 (s, 3H), 2.23 – 2.06 (m, 2H), 1.58 – 1.45 (m, 2H).

**<sup>13</sup>C NMR (125 MHz, CDCl<sub>3</sub>):** δ 192.2, 145.5, 137.0, 134.1, 133.2, 129.8, 129.6, 129.1, 128.8, 69.5, 50.9, 29.7, 26.3, 25.7, 21.7.

**HRMS (ESI-TOF, [M + Na]<sup>+</sup>):** Calcd for C<sub>18</sub>H<sub>19</sub>N<sub>3</sub>O<sub>3</sub>S<sub>2</sub>: 380.1045, found 380.1045.

**5-(4-((4-(5,5-difluoro-1,3,7,9-tetramethyl-5H-4H,5H-dipyrrolo[1,2-c:2',1'-f][1,3,2]diazaborinin-10-yl)phenoxy)methyl)-1H-1,2,3-triazol-1-yl)-1-phenyl-2-tosylpentan-1-one (7)**

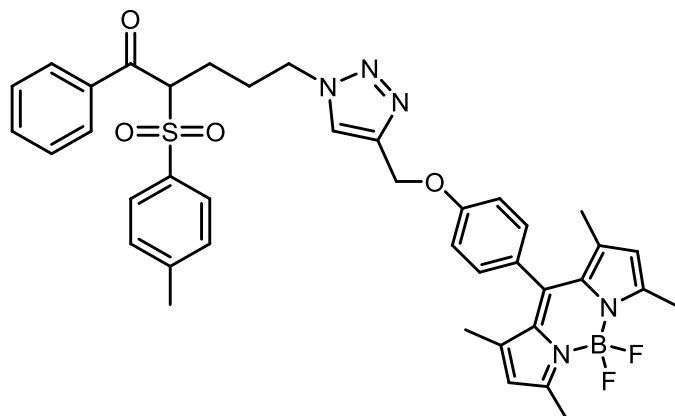

**7** was obtained in 72% (105.8 mg) as an orange solid after column chromatography (eluent: petroleum ether/ethyl acetate = 1/1 v/v,  $R_f$  = 0.2).

**$^1\text{H}$  NMR (500 MHz,  $\text{CDCl}_3$ ):**  $\delta$  7.91 (d,  $J$  = 7.5 Hz, 2H), 7.61 – 7.58 (m, 4H), 7.45 (t,  $J$  = 7.8 Hz, 2H), 7.28 – 7.26 (m, 3H), 7.16 (d,  $J$  = 8.6 Hz, 2H), 7.08 (d,  $J$  = 8.7 Hz, 2H), 5.97 (s, 2H), 5.20 (s, 2H), 5.10 (dd,  $J$  = 8.5, 5.7 Hz, 1H), 4.34 (t,  $J$  = 7.0 Hz, 2H), 2.54 (s, 6H), 2.40 (s, 3H), 2.18 – 2.15 (m, 2H), 2.02 – 1.85 (m, 2H), 1.40 (s, 6H).

**$^{13}\text{C}$  NMR (125 MHz,  $\text{CDCl}_3$ ):**  $\delta$  192.0, 158.8, 155.3, 145.7, 143.8, 143.1, 141.6, 136.7, 134.3, 133.2, 131.8, 129.7, 129.6, 129.3, 129.1, 128.8, 127.7, 122.8, 121.2, 115.4, 69.1, 62.0, 49.7, 27.5, 25.1, 21.7, 14.6.

**HRMS (ESI-TOF,  $[\text{M} + \text{H}]^+$ ):** Calcd for  $\text{C}_{40}\text{H}_{40}\text{BF}_2\text{N}_5\text{O}_4\text{S}$ : 736.2940, found 736.2947.

**(2-tosylethene-1,1-diyl)dibenzene (8)<sup>4</sup>**

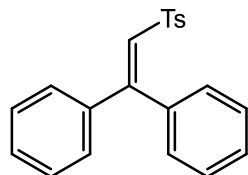

**8** was obtained in 30% (60.1 mg) as a white solid after column chromatography (eluent: petroleum ether/ethyl acetate = 20/1 v/v,  $R_f$  = 0.2).

**$^1\text{H}$  NMR (500 MHz,  $\text{CDCl}_3$ ):**  $\delta$  7.47 (d,  $J$  = 8.4 Hz, 2H), 7.38 – 7.34 (m, 2H), 7.29 (t,  $J$  = 7.5 Hz, 4H), 7.20 (d,  $J$  = 7.1 Hz, 2H), 7.14 (d,  $J$  = 8.0 Hz, 2H), 7.10 (d,  $J$  = 6.7 Hz, 1H), 6.99 (s, 1H), 2.37 (s, 3H).

**2,6-di-*tert*-butyl-4-methylphenyl 4-methylbenzenesulfonate (9)<sup>4</sup>**

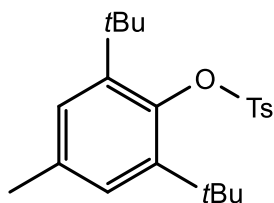

**9** was obtained in 12% (25.8 mg) as a white solid after column chromatography (eluent: petroleum ether/ethyl acetate = 20/1 v/v, R<sub>f</sub> = 0.3).

**<sup>1</sup>H NMR (500 MHz, CDCl<sub>3</sub>):** δ 7.52 (d, *J* = 8.3 Hz, 2H), 7.19 (d, *J* = 7.9 Hz, 2H), 6.64 (s, 2H), 2.37 (s, 3H), 1.81 (s, 3H), 1.10 (s, 18H).

**(E)-1,3-di-*tert*-butyl-5-methyl-2-((1-phenyl-2-tosylprop-1-en-1-yl)oxy)benzene (10)**

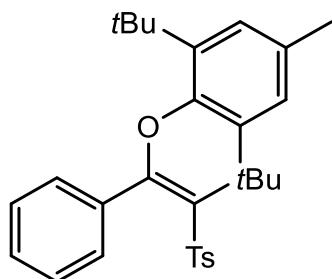

**HRMS (ESI-TOF, [M + H]<sup>+</sup>):** Calcd for C<sub>31</sub>H<sub>38</sub>O<sub>3</sub>S: 491.2620, found 491.2639.

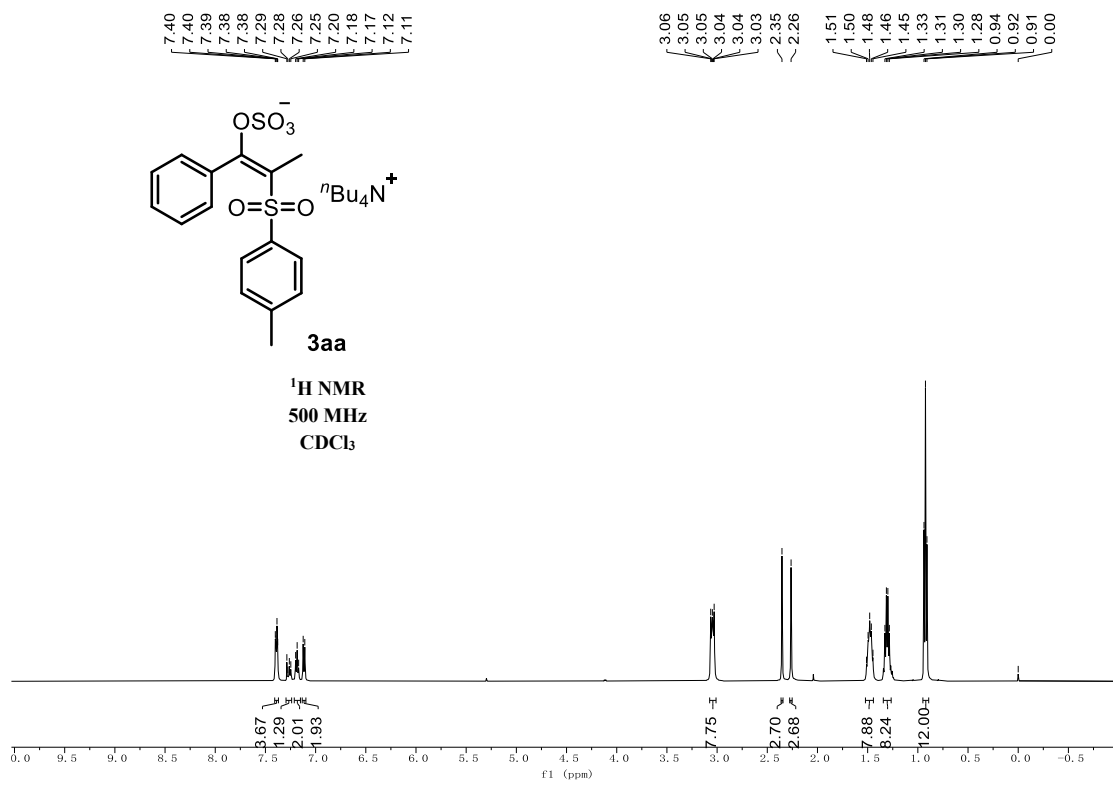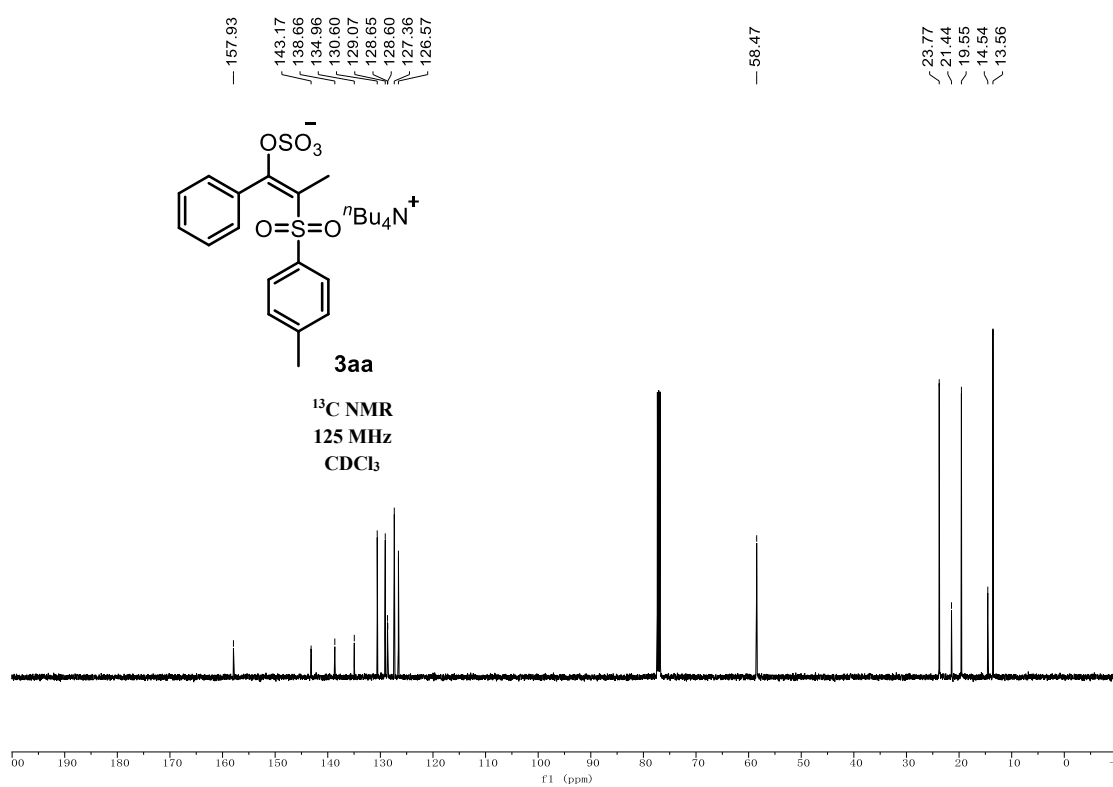

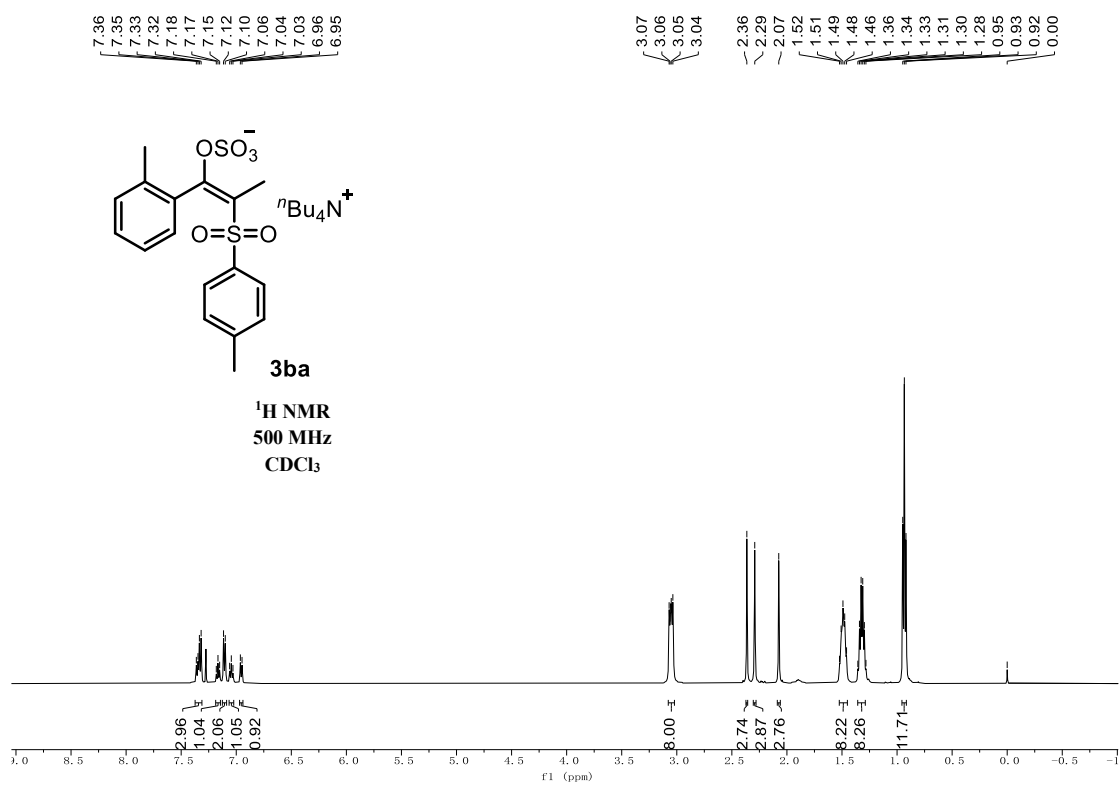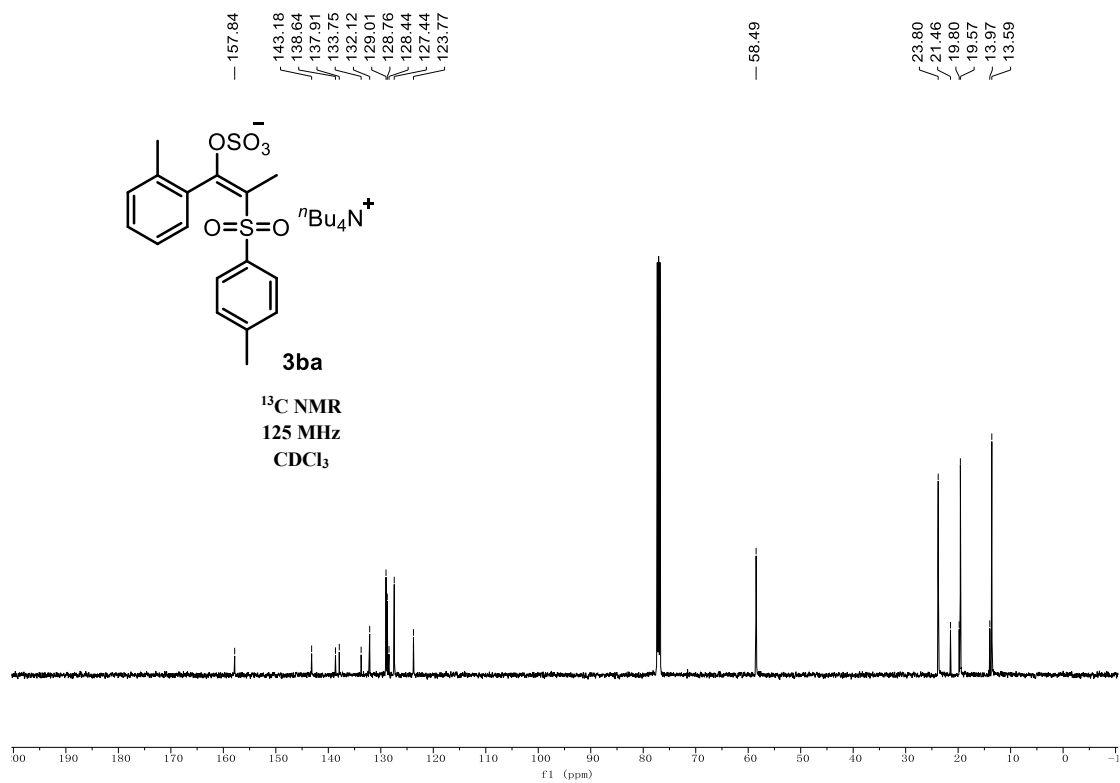

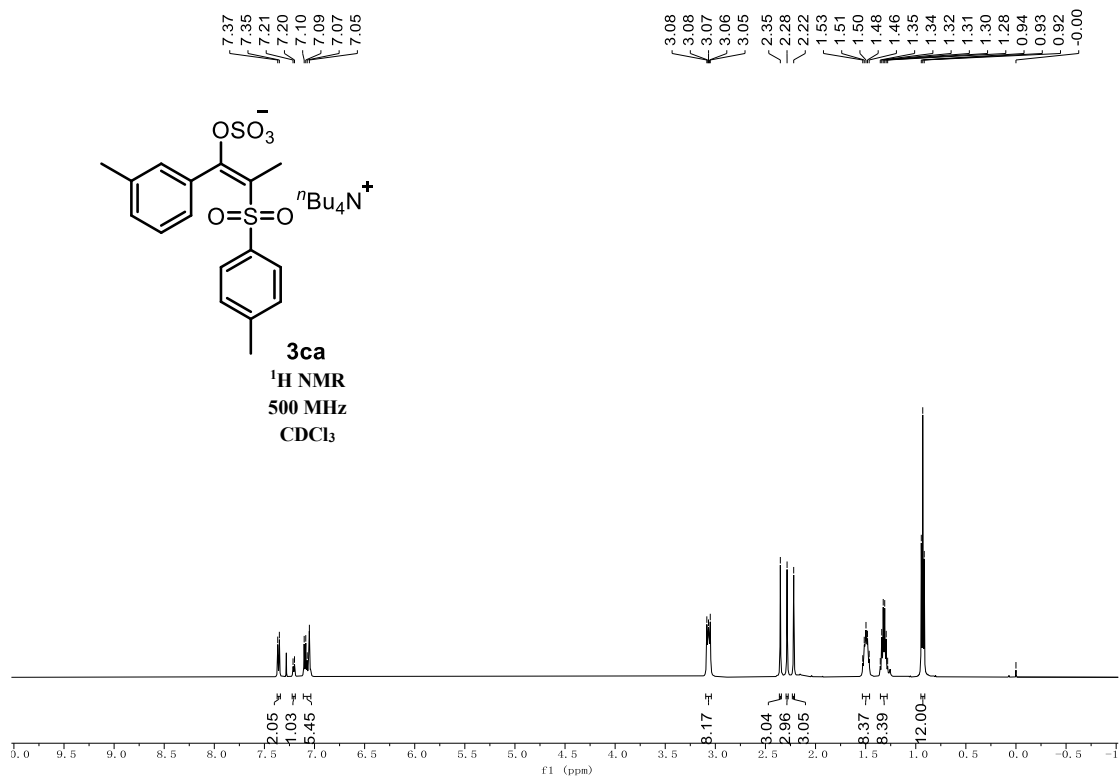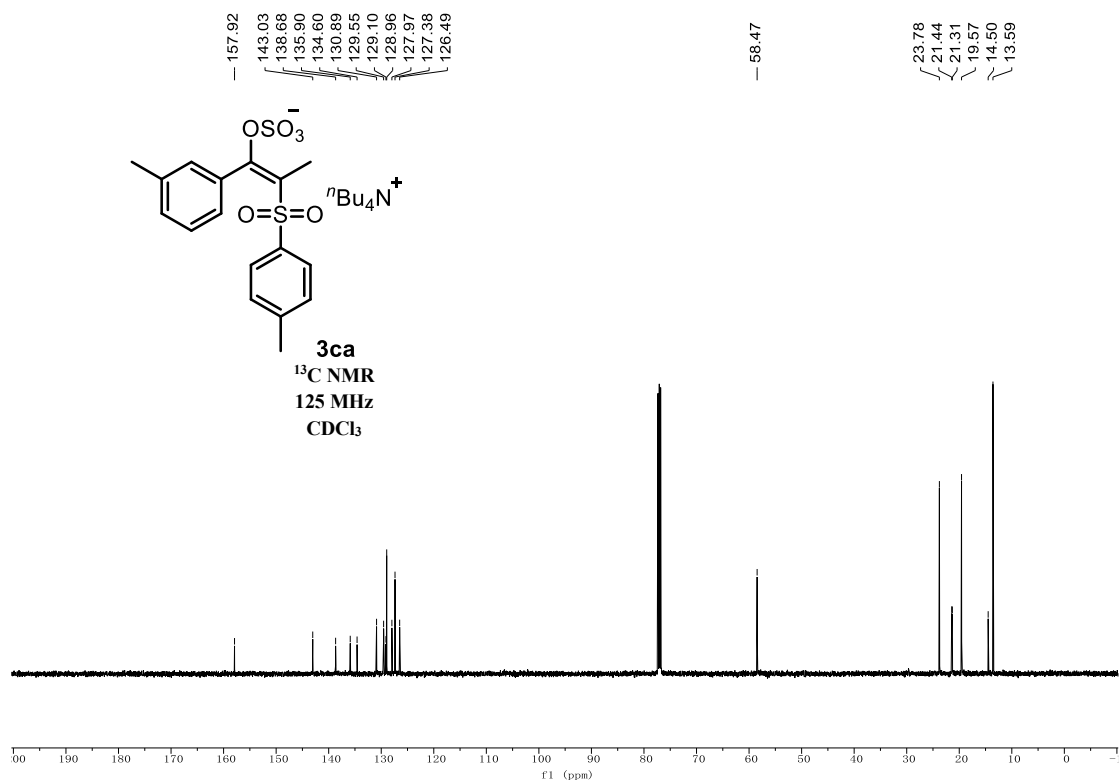

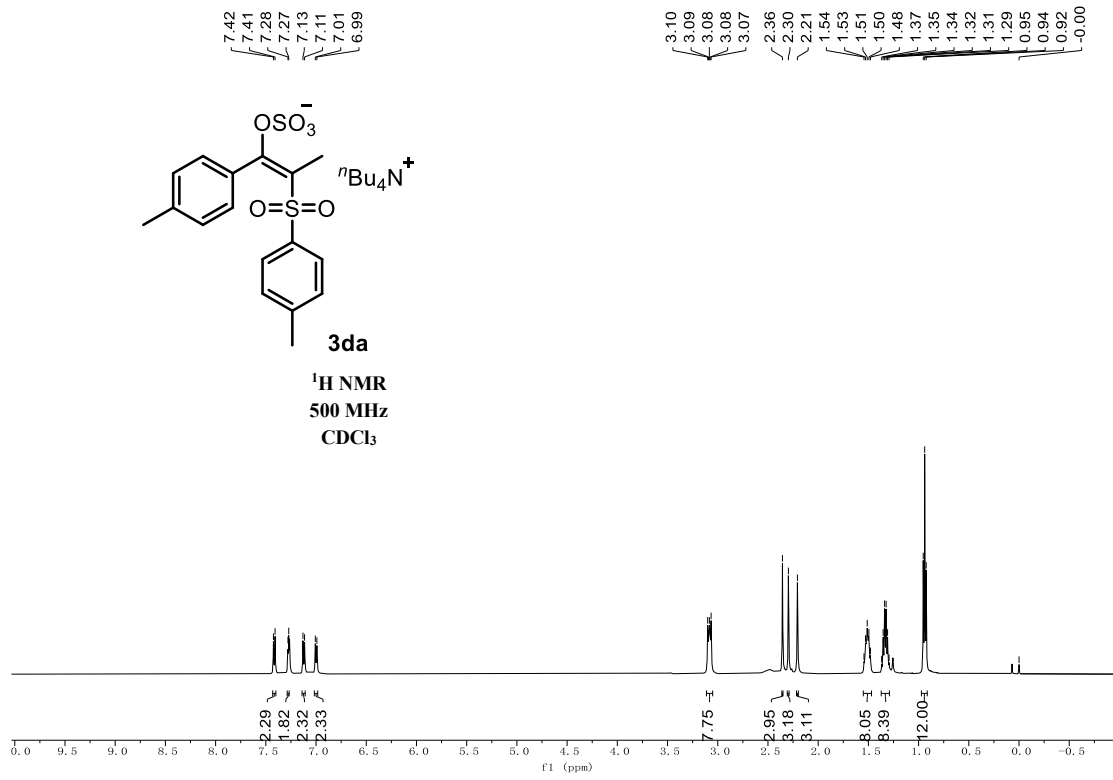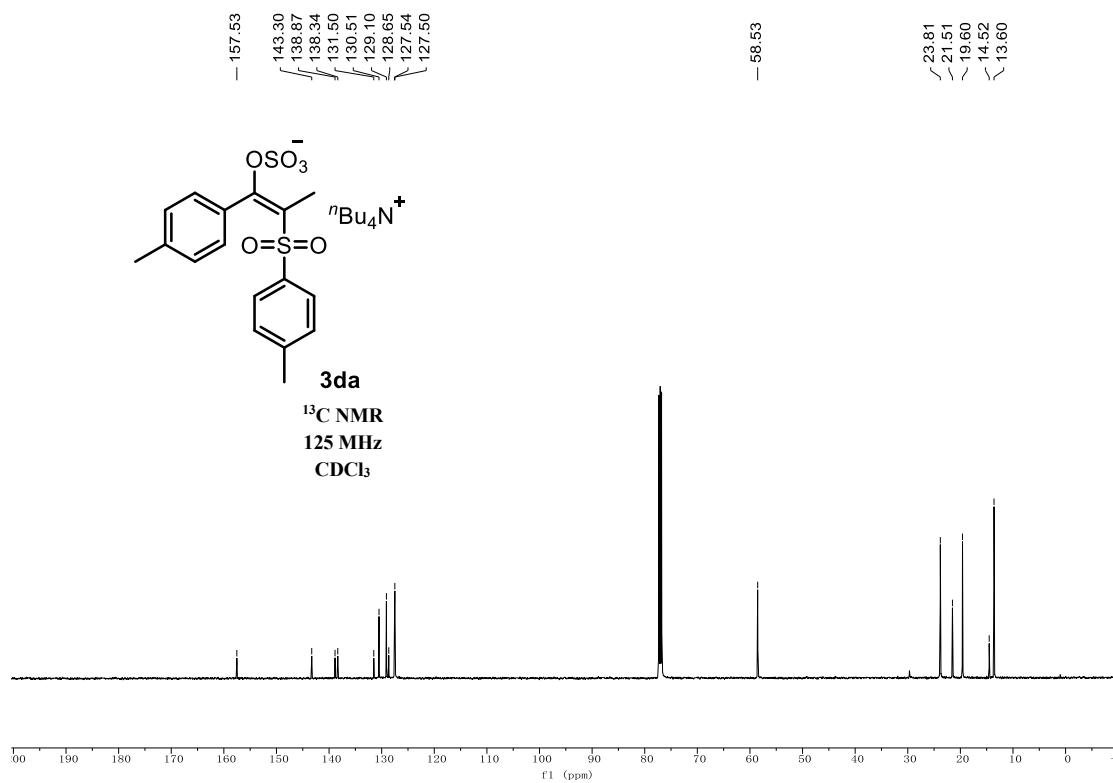

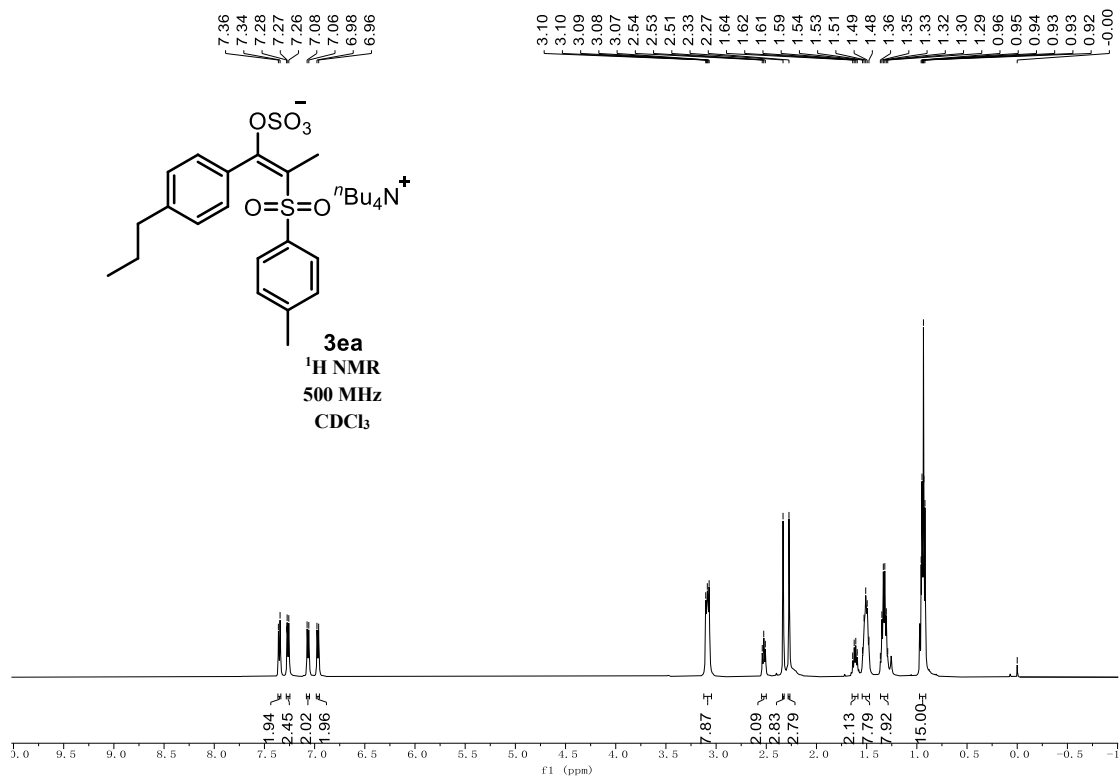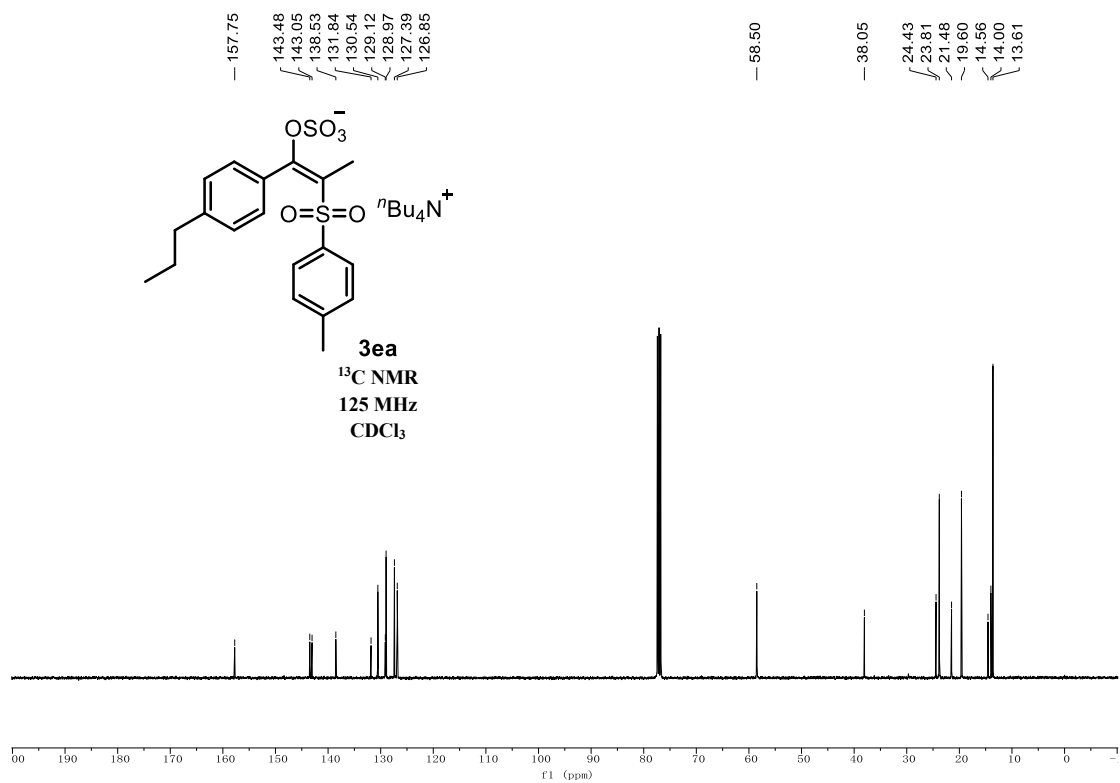



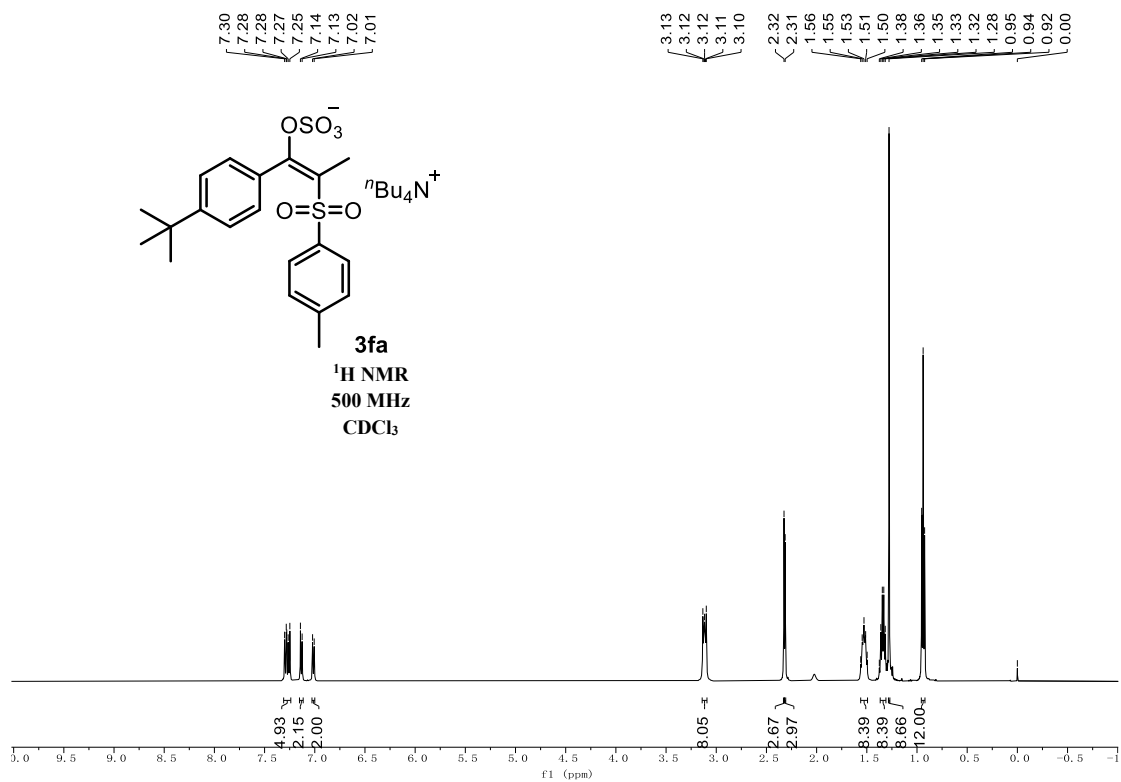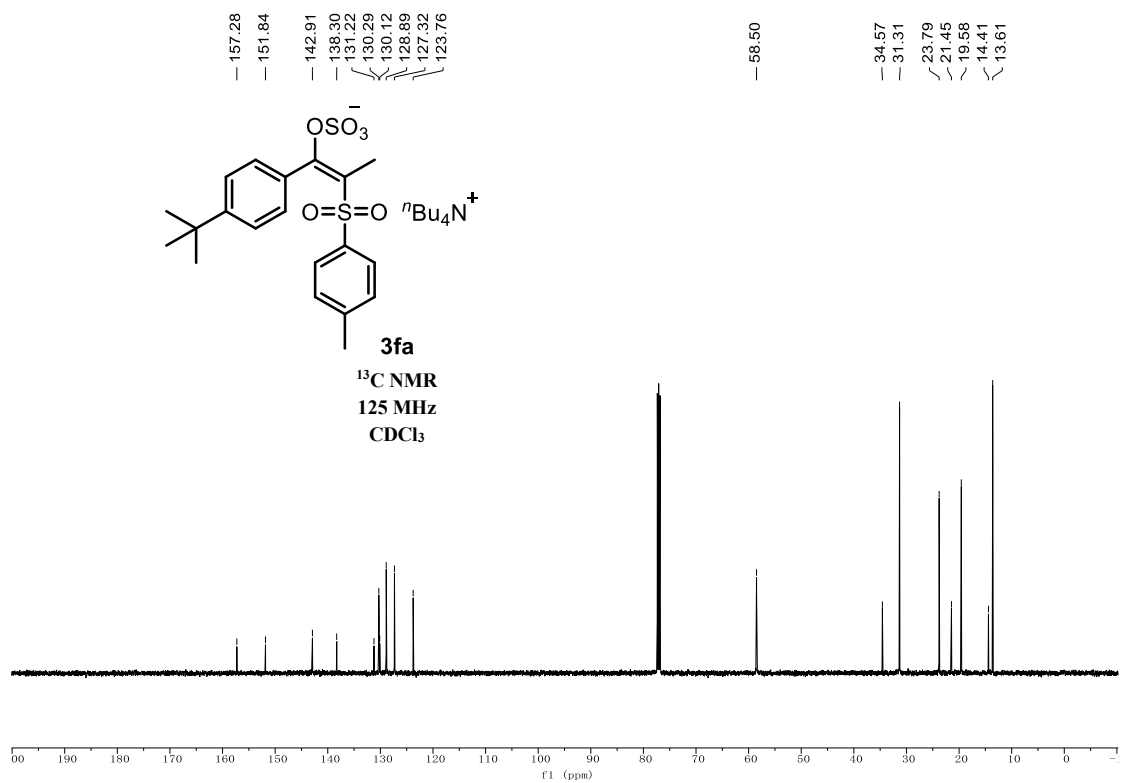

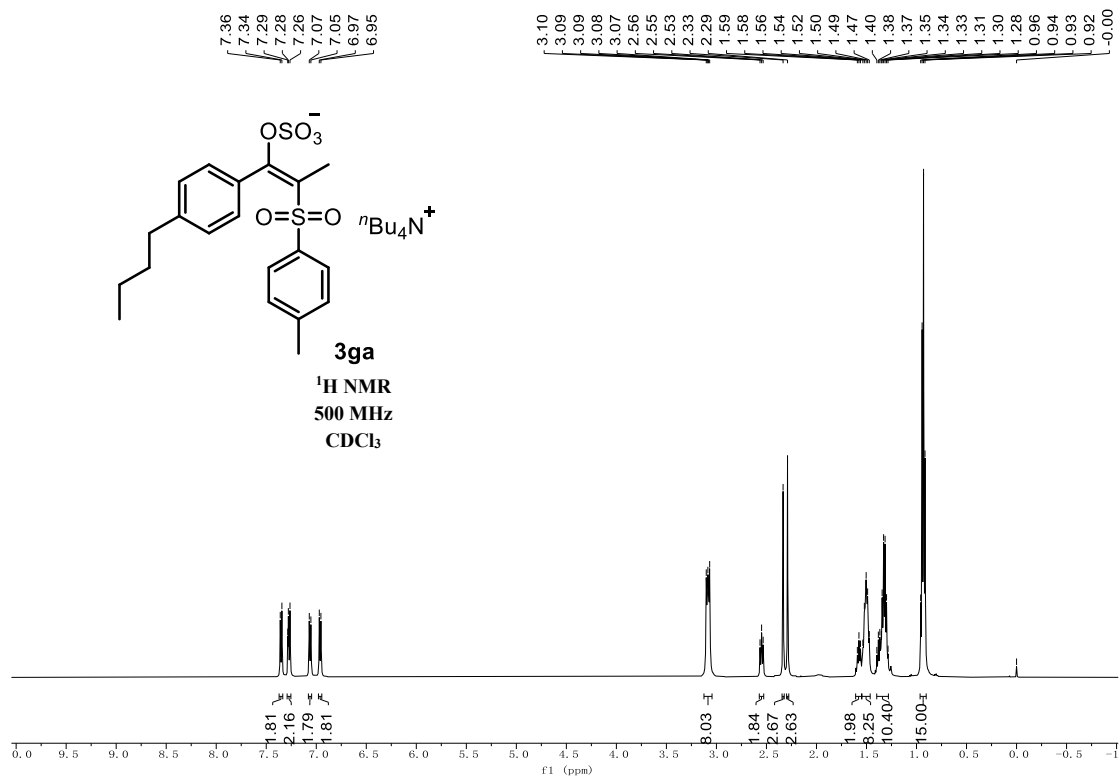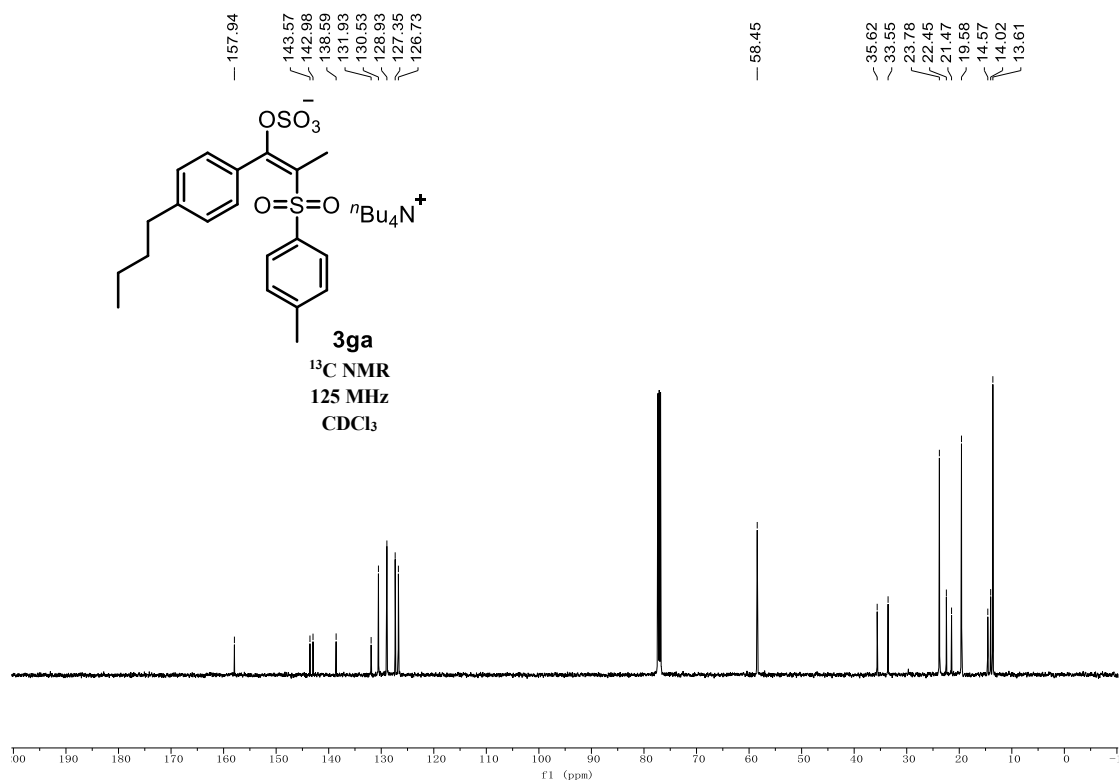

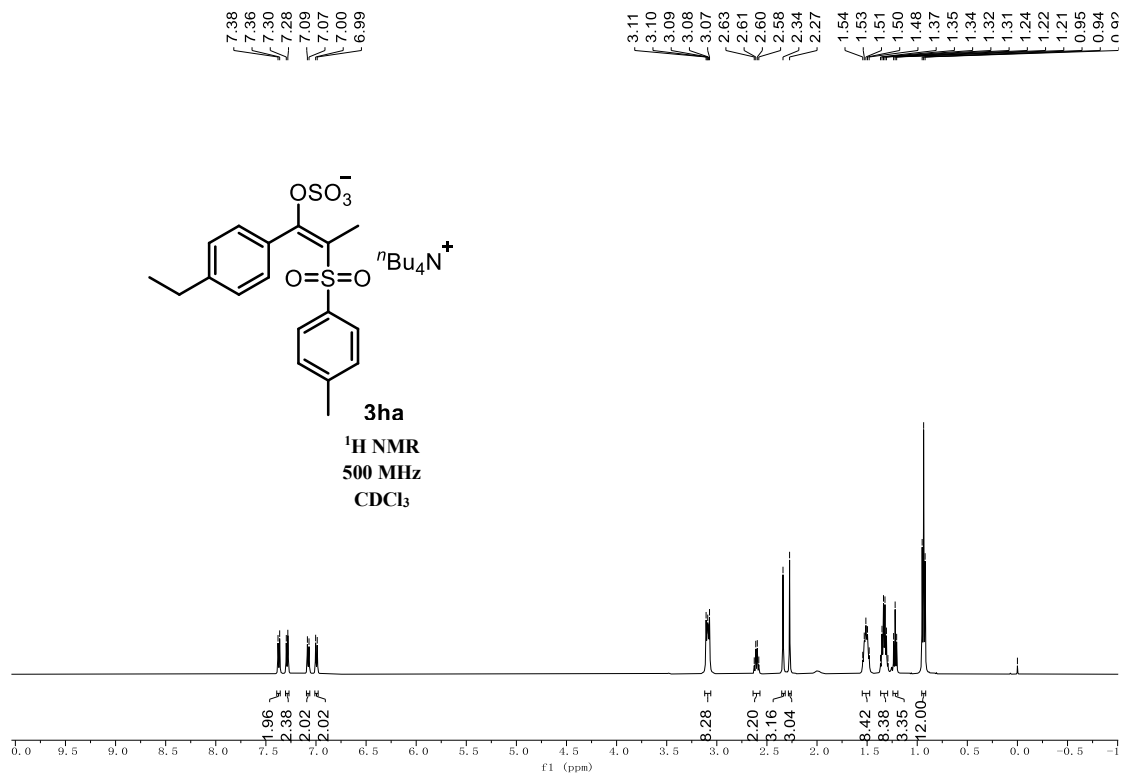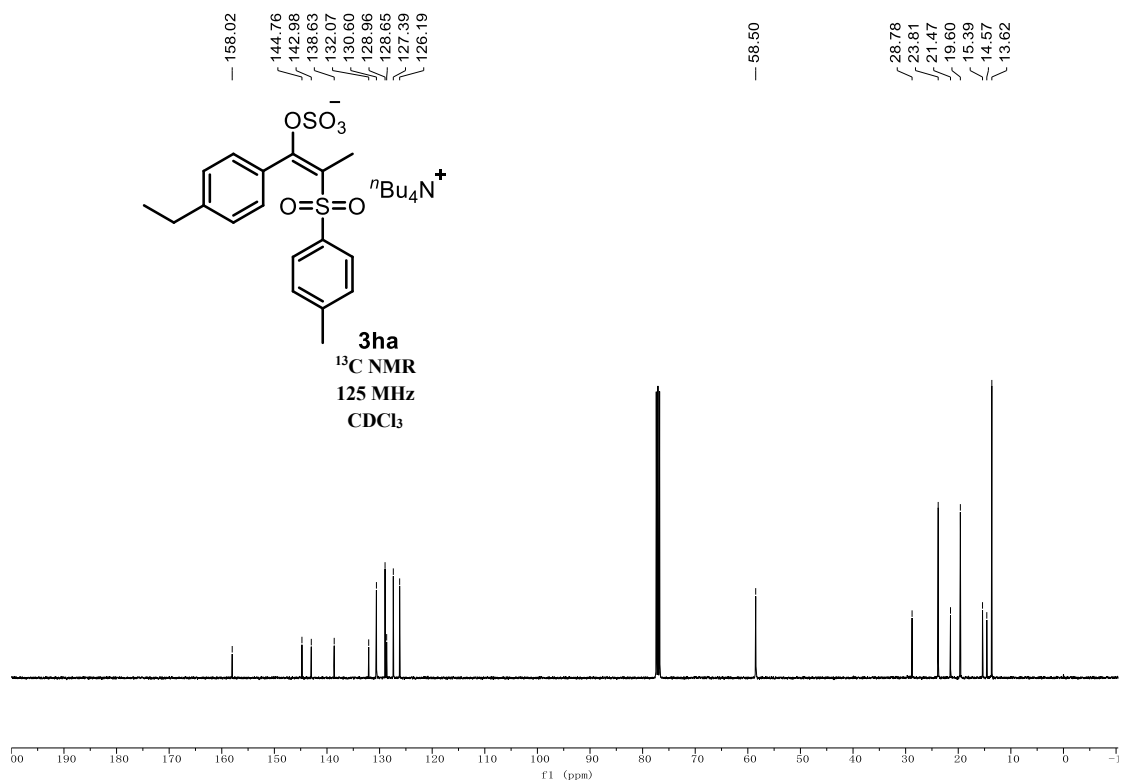

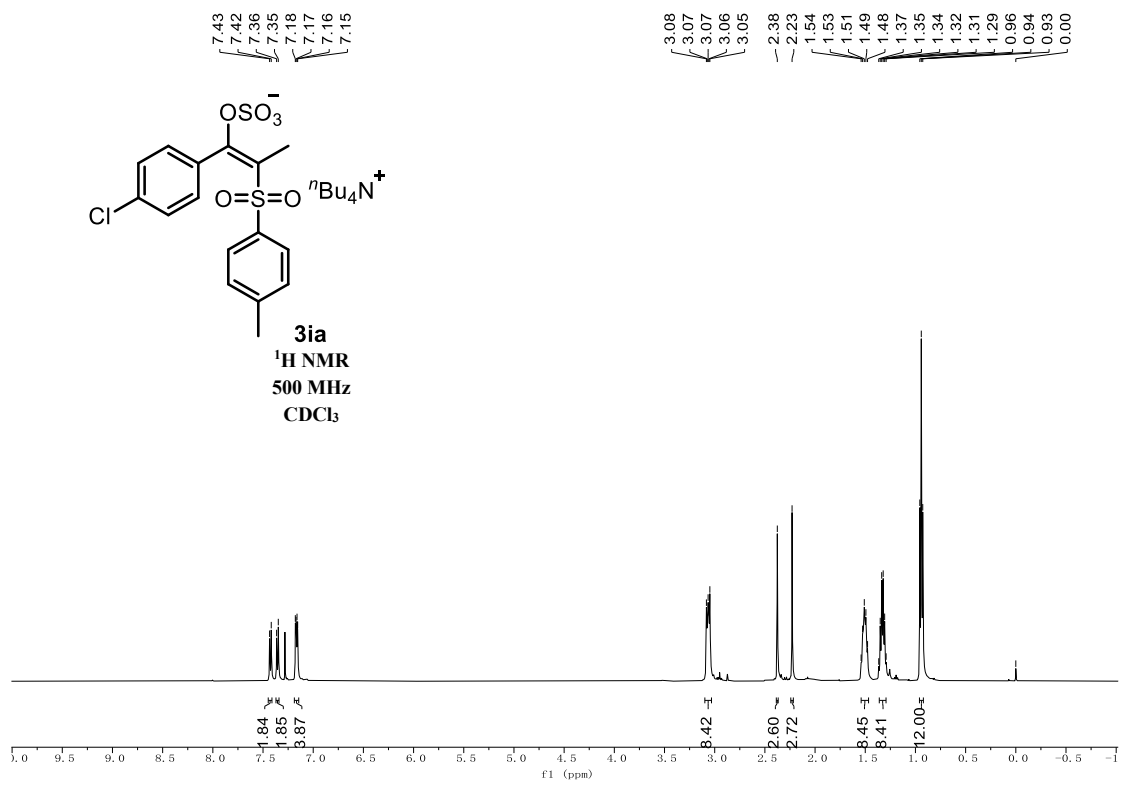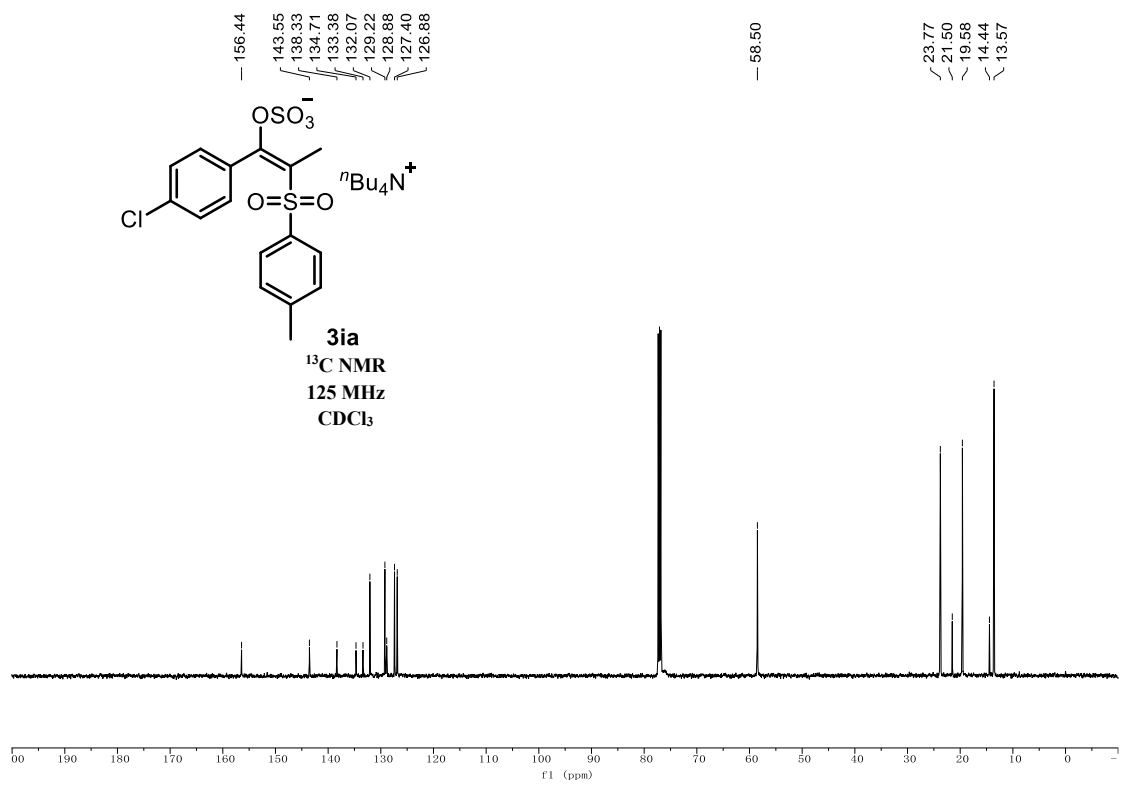

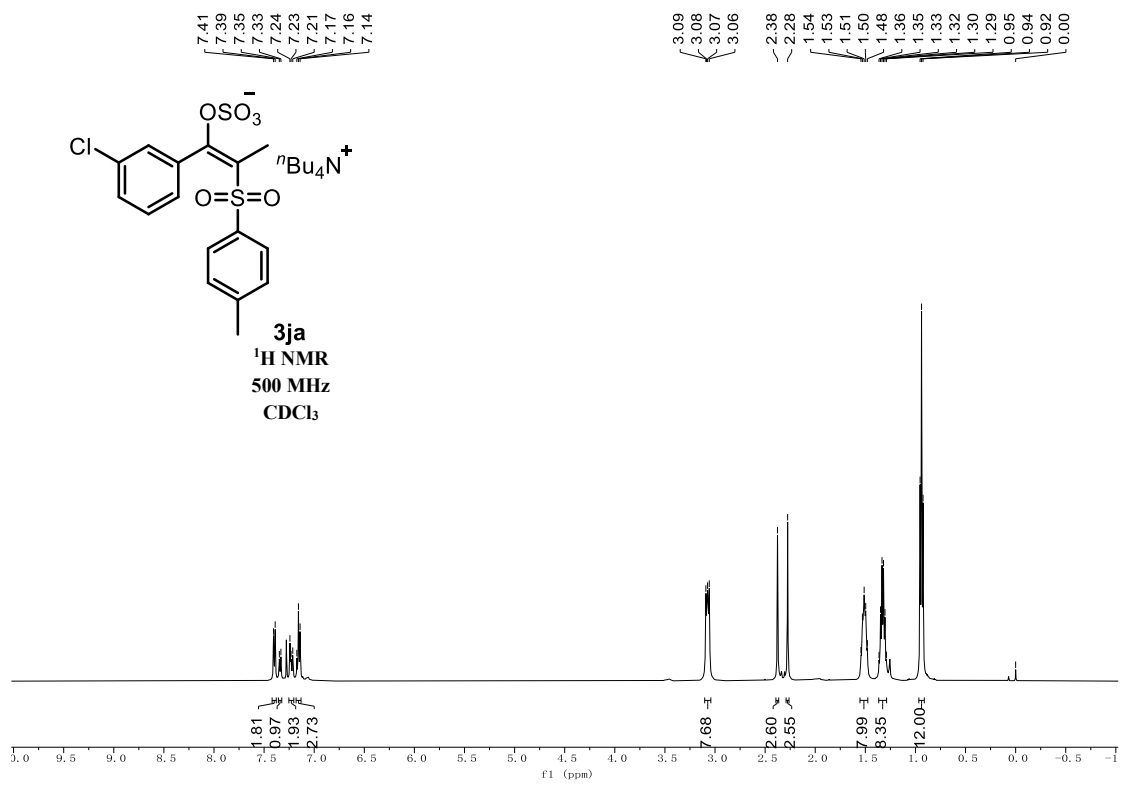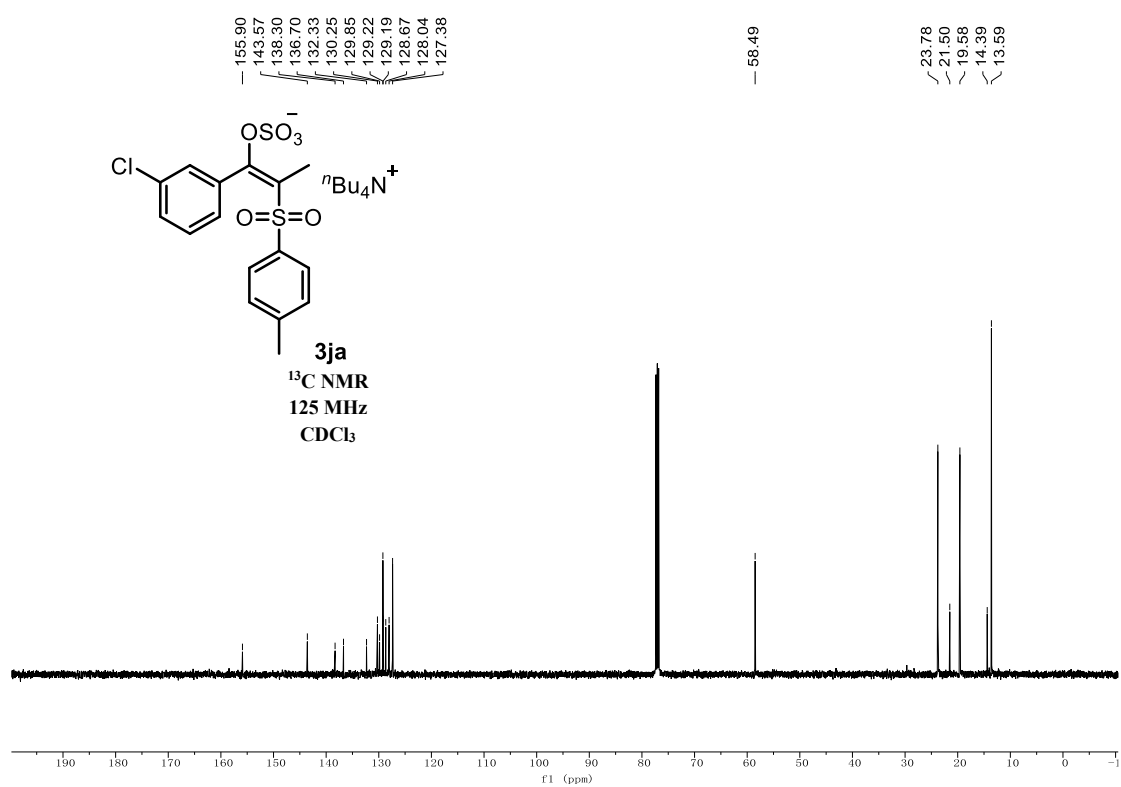

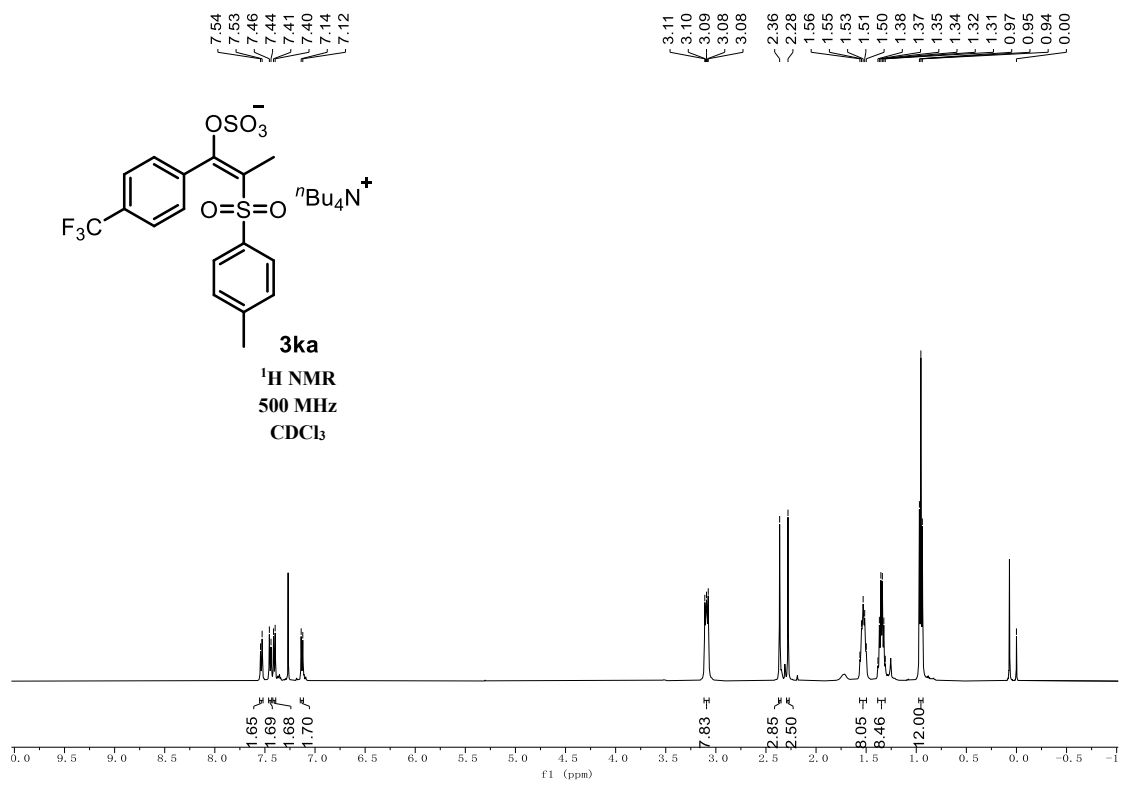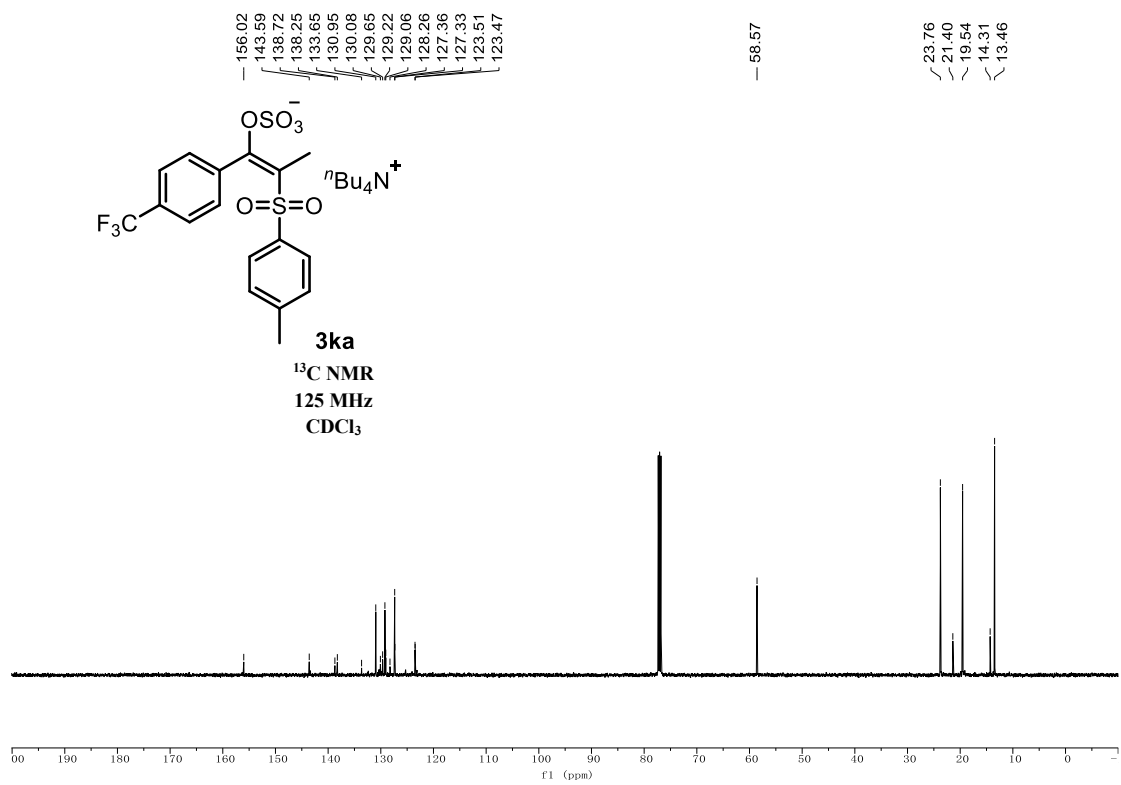

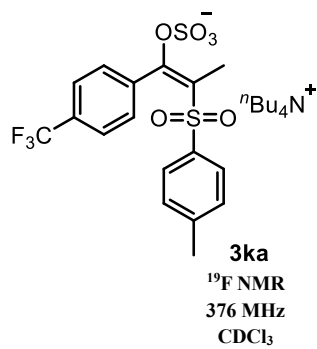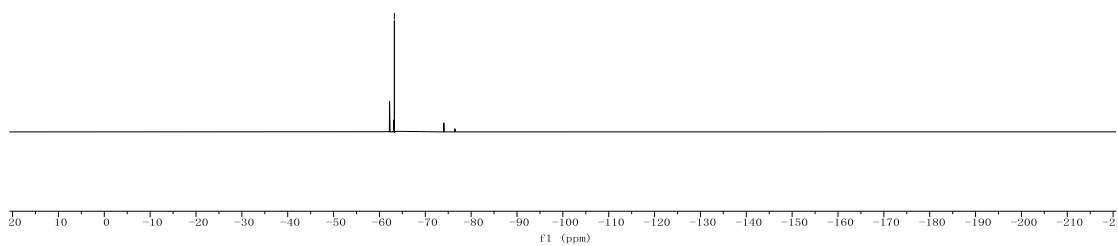

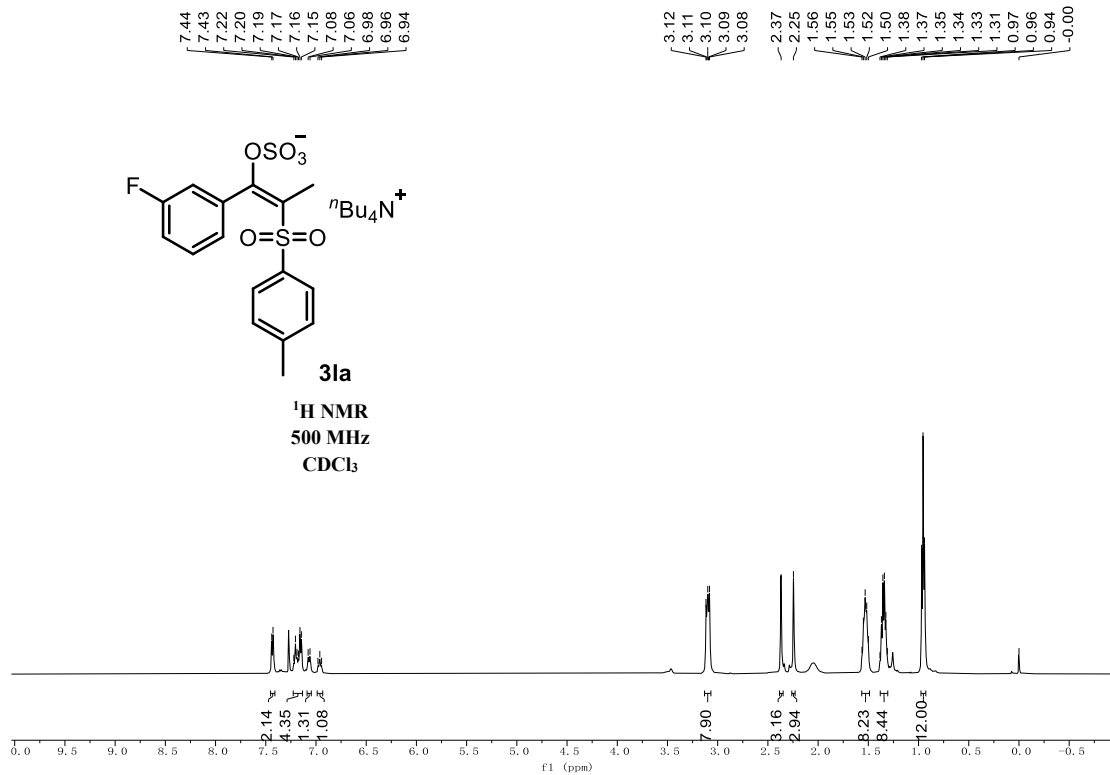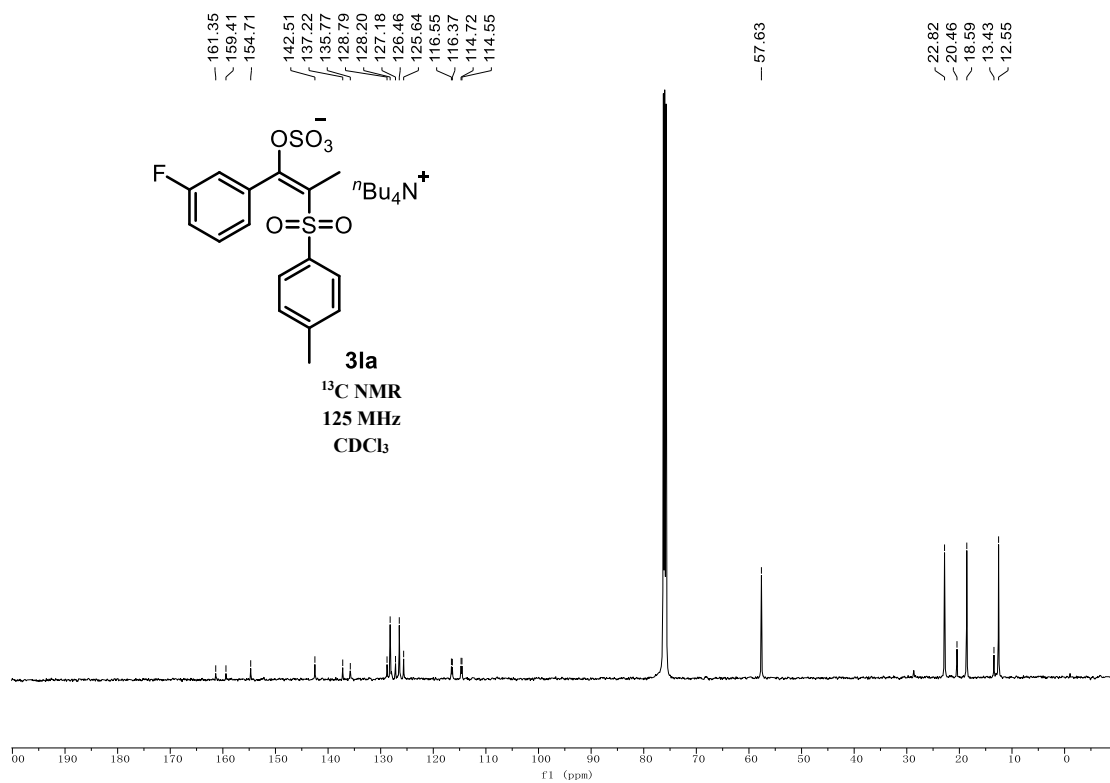



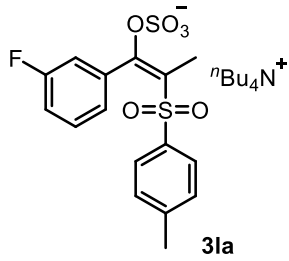

<sup>19</sup>F NMR  
376 MHz  
CDCl<sub>3</sub>

-114.94

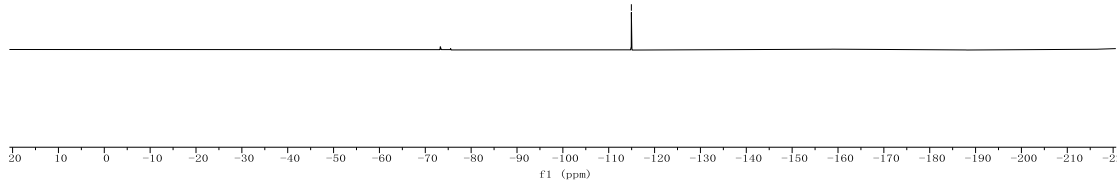

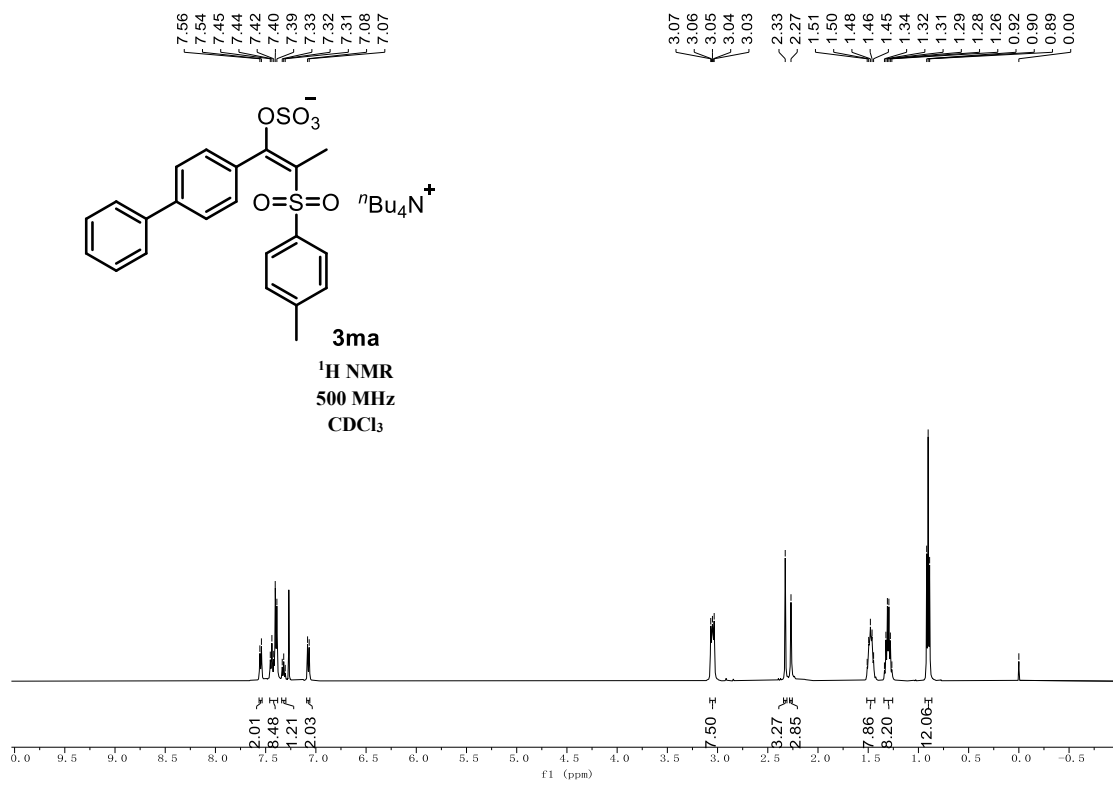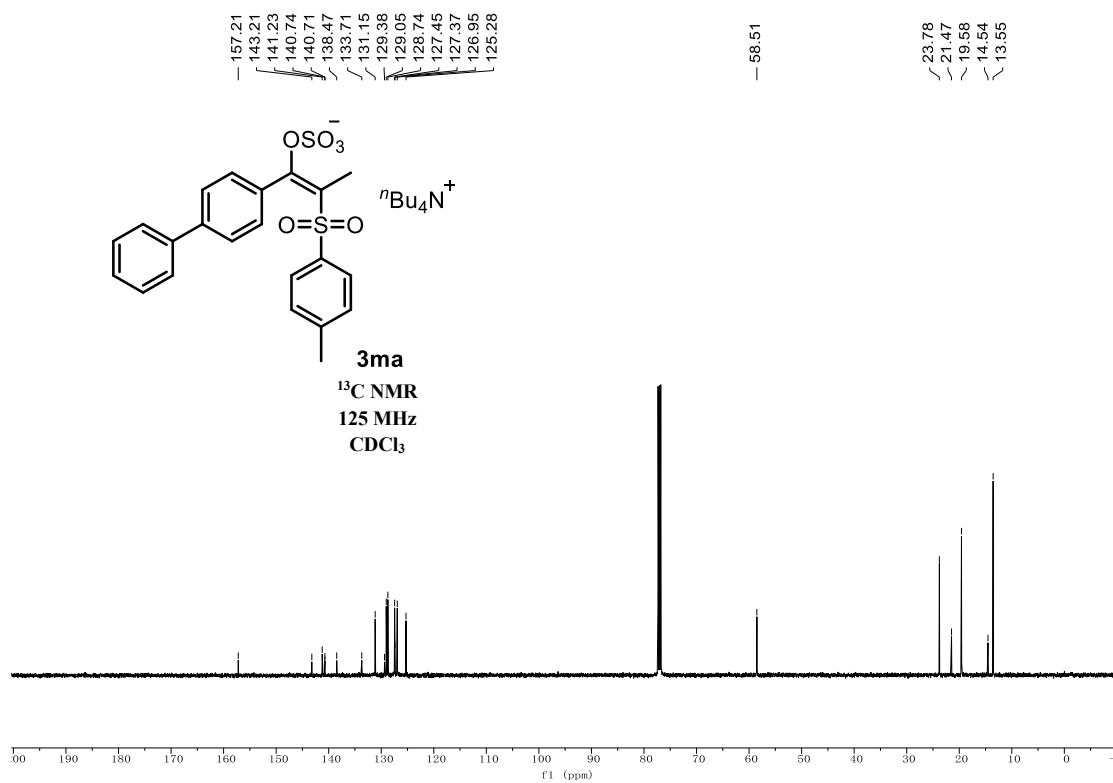

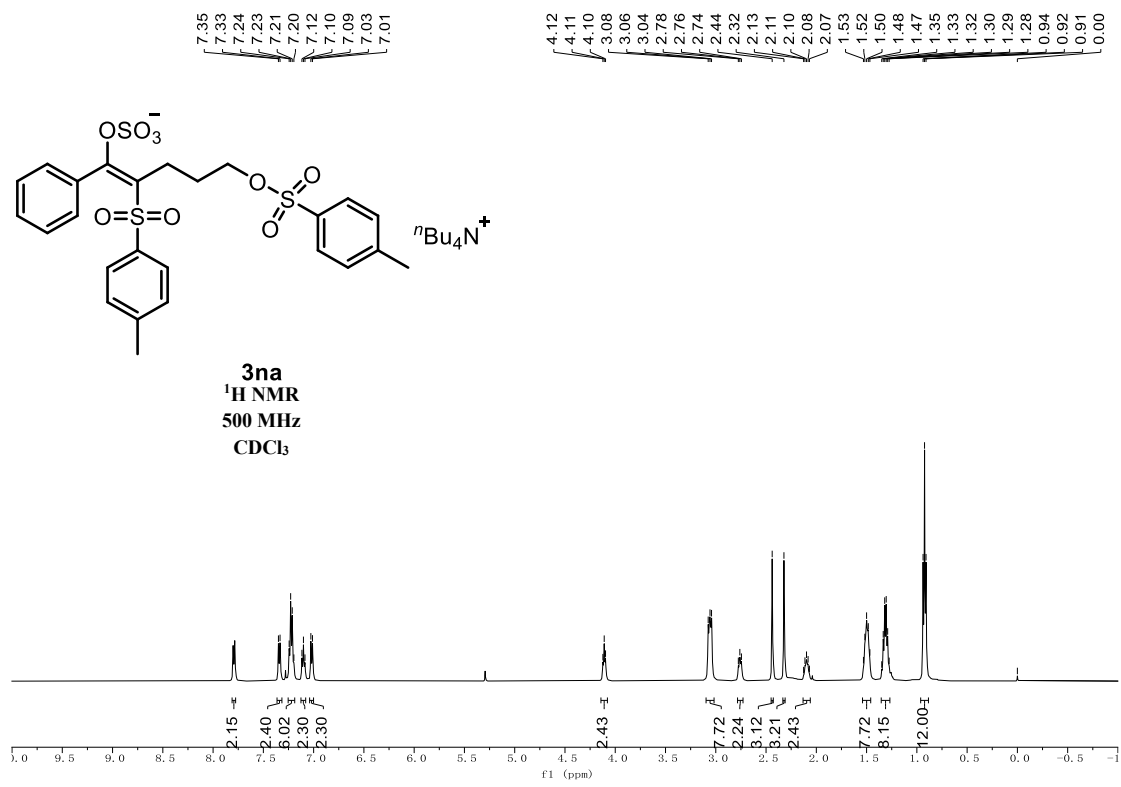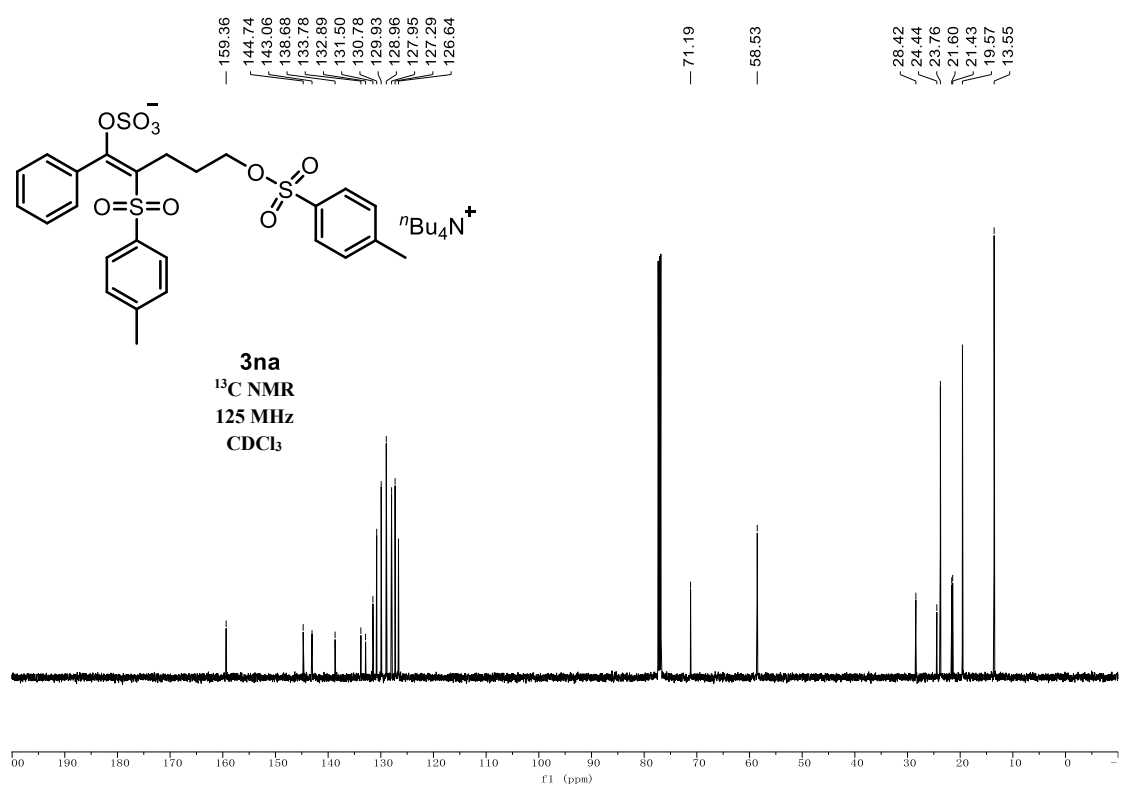

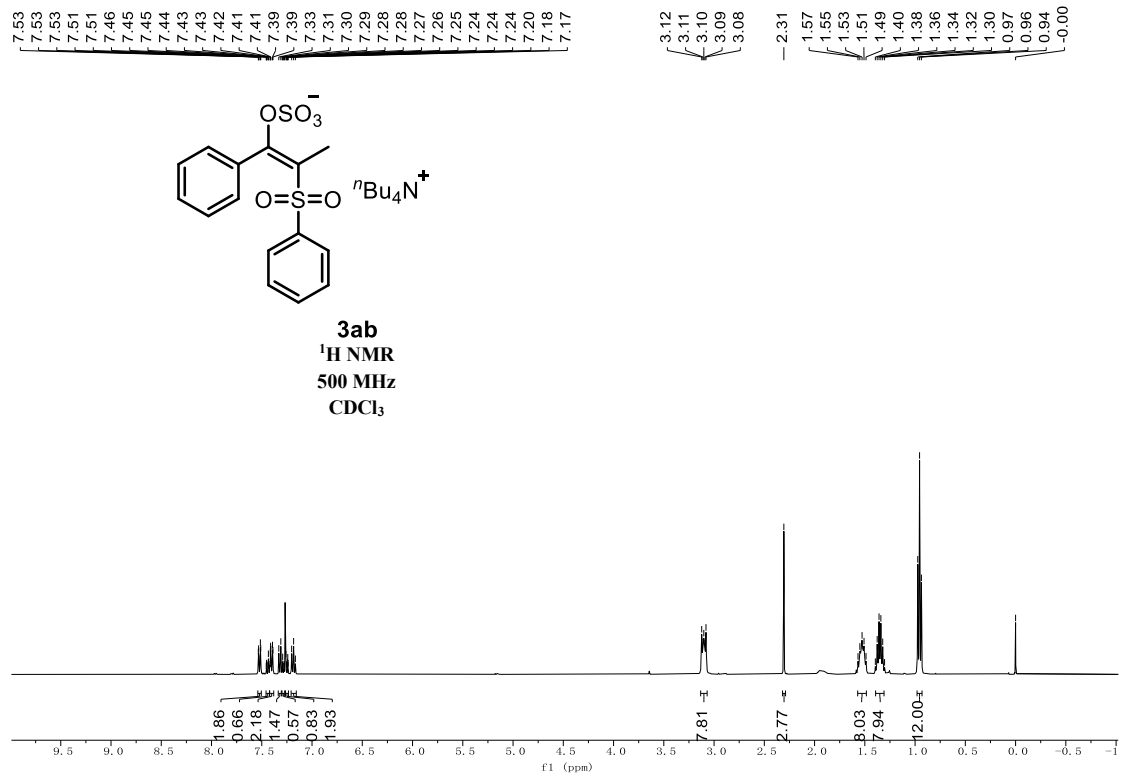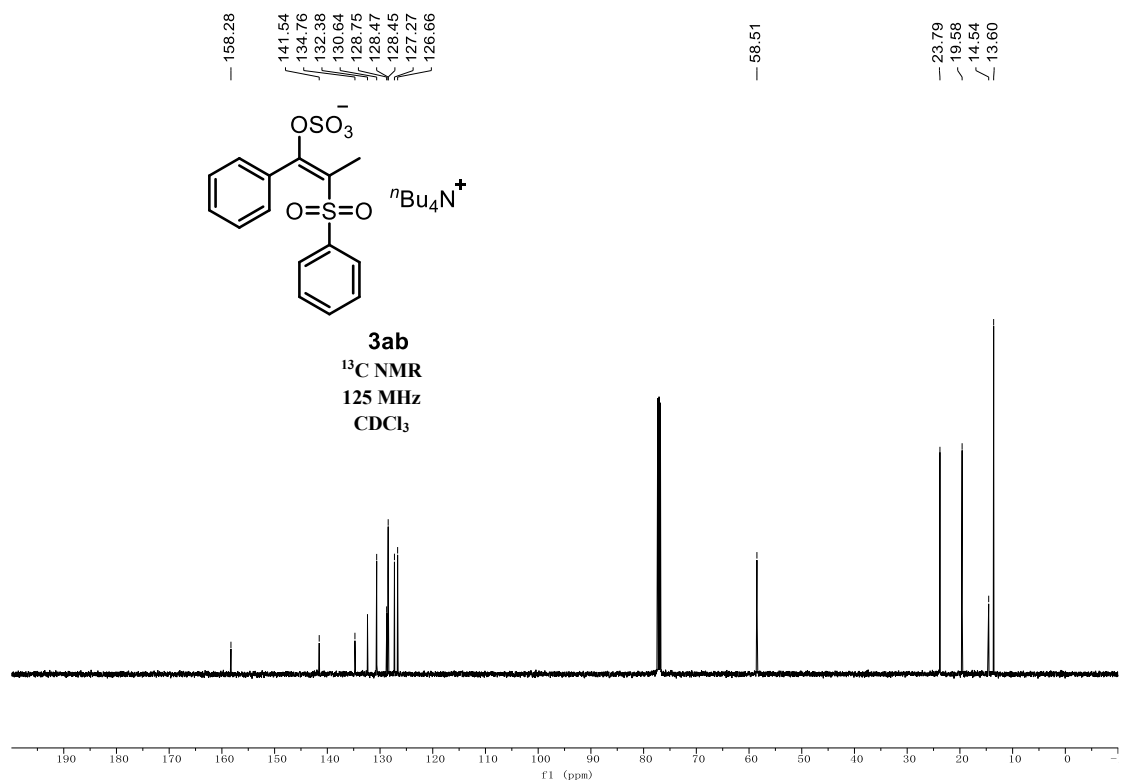

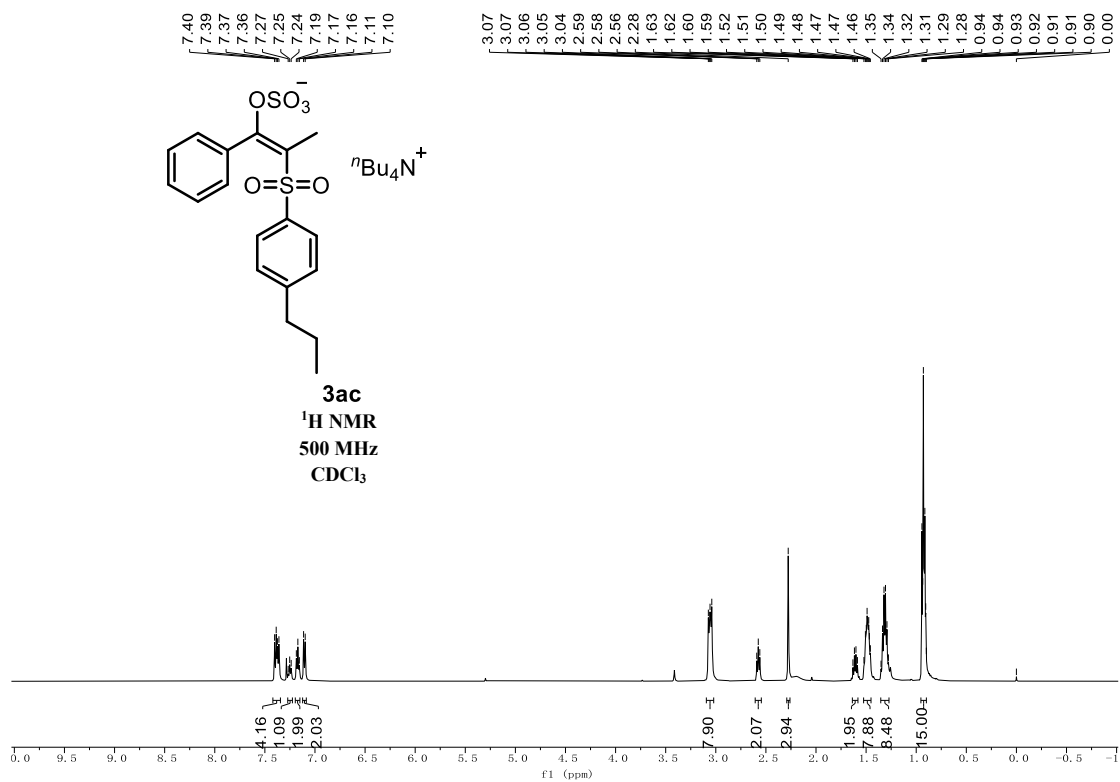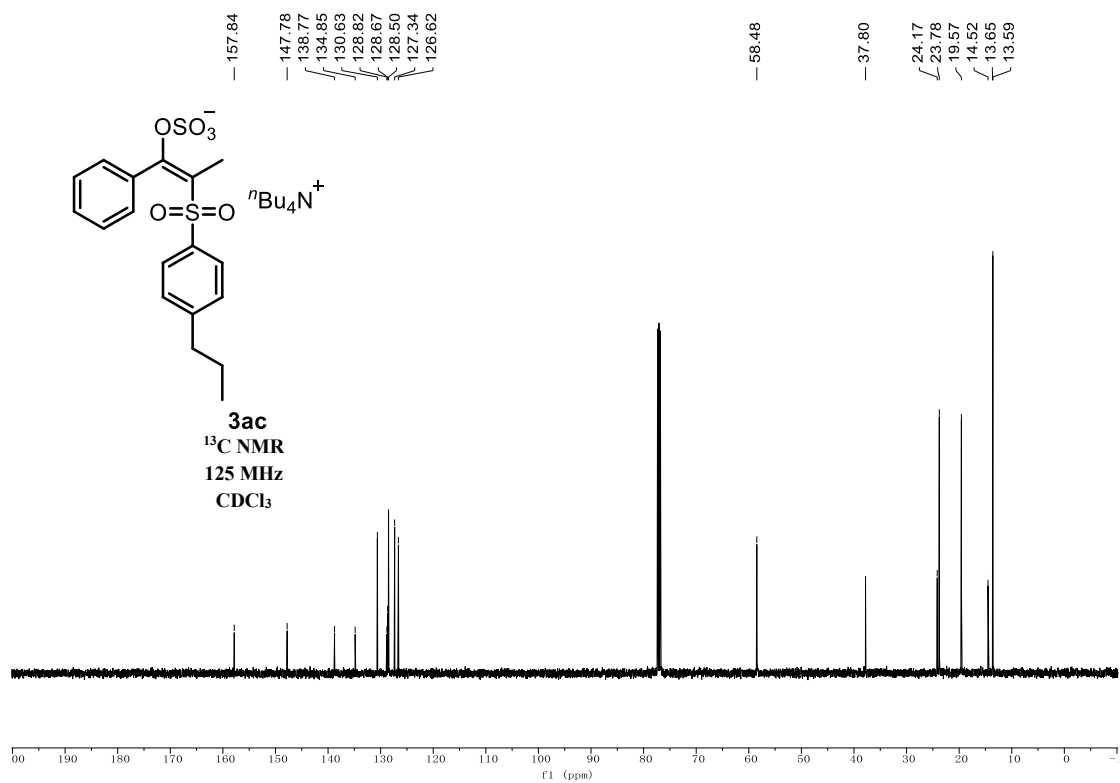

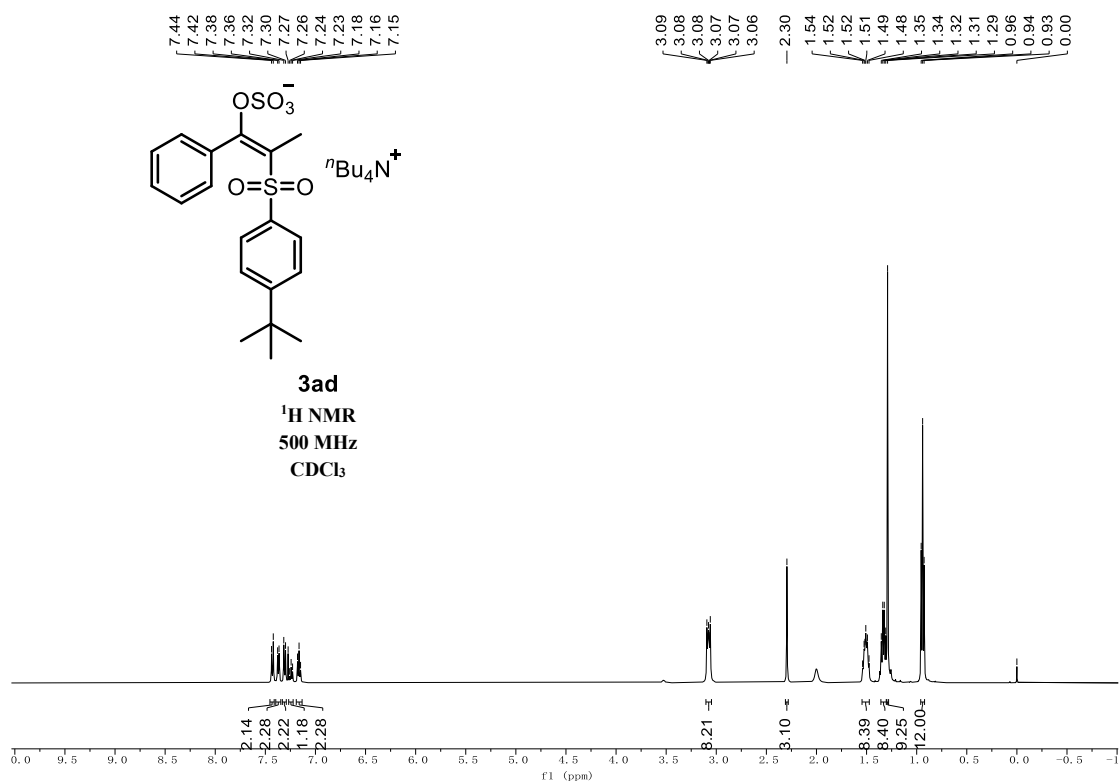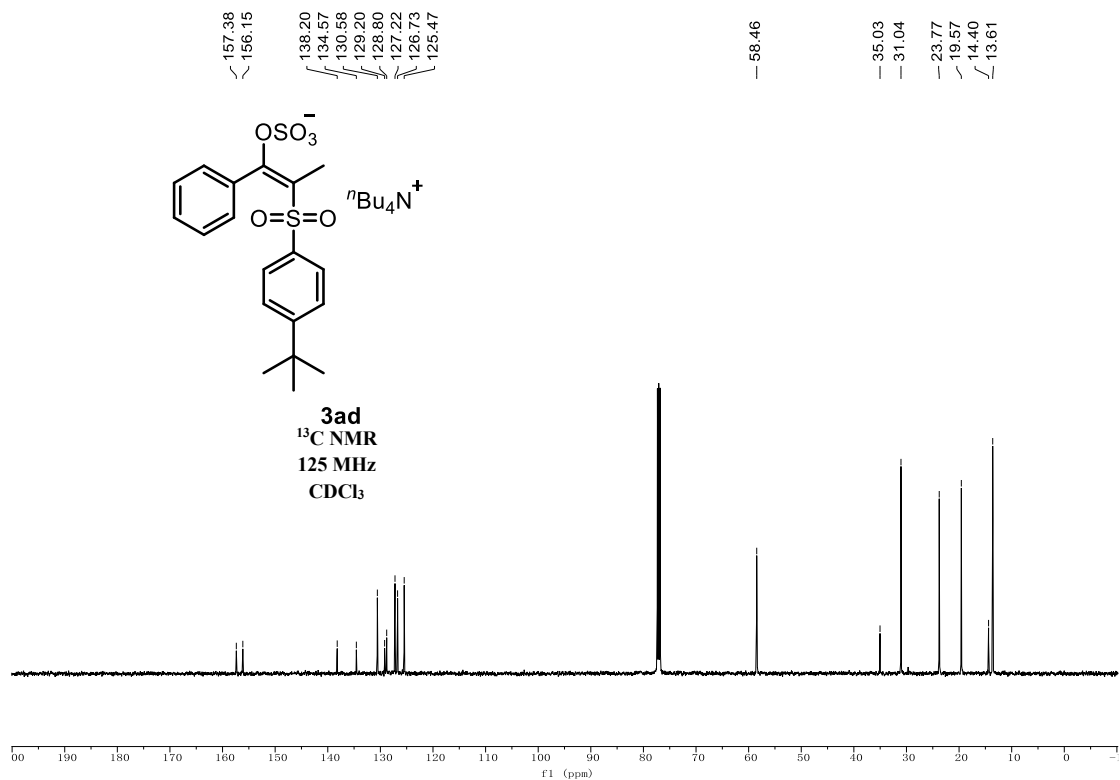

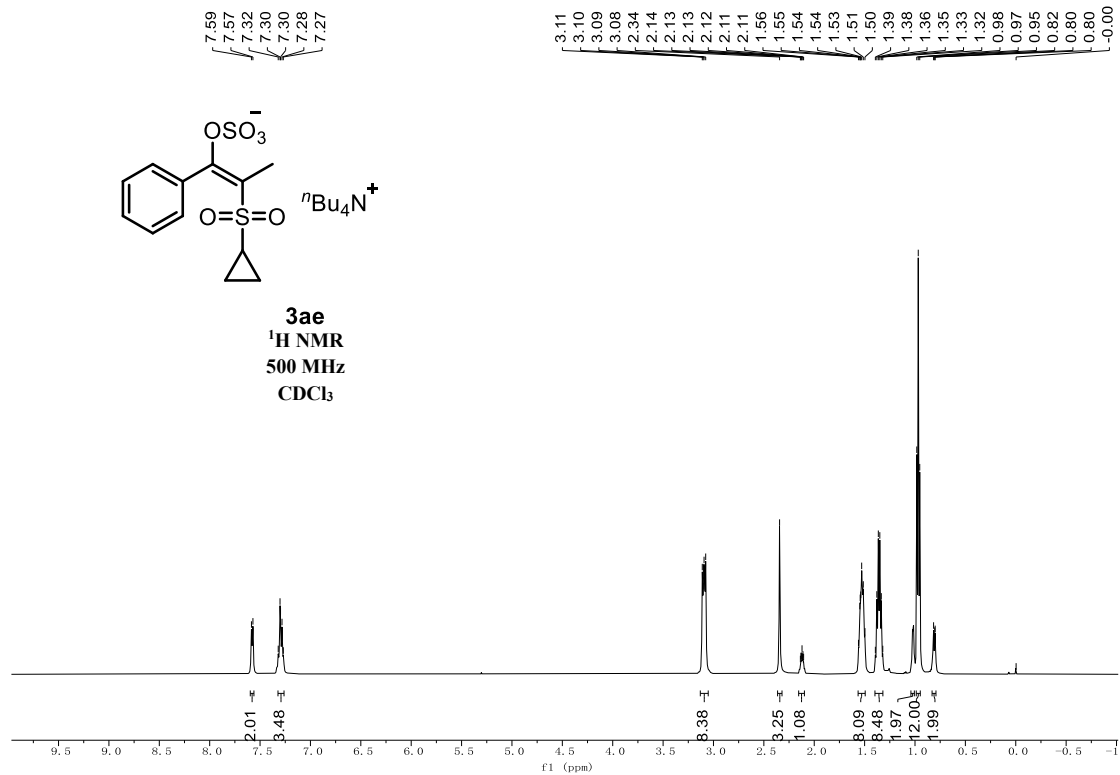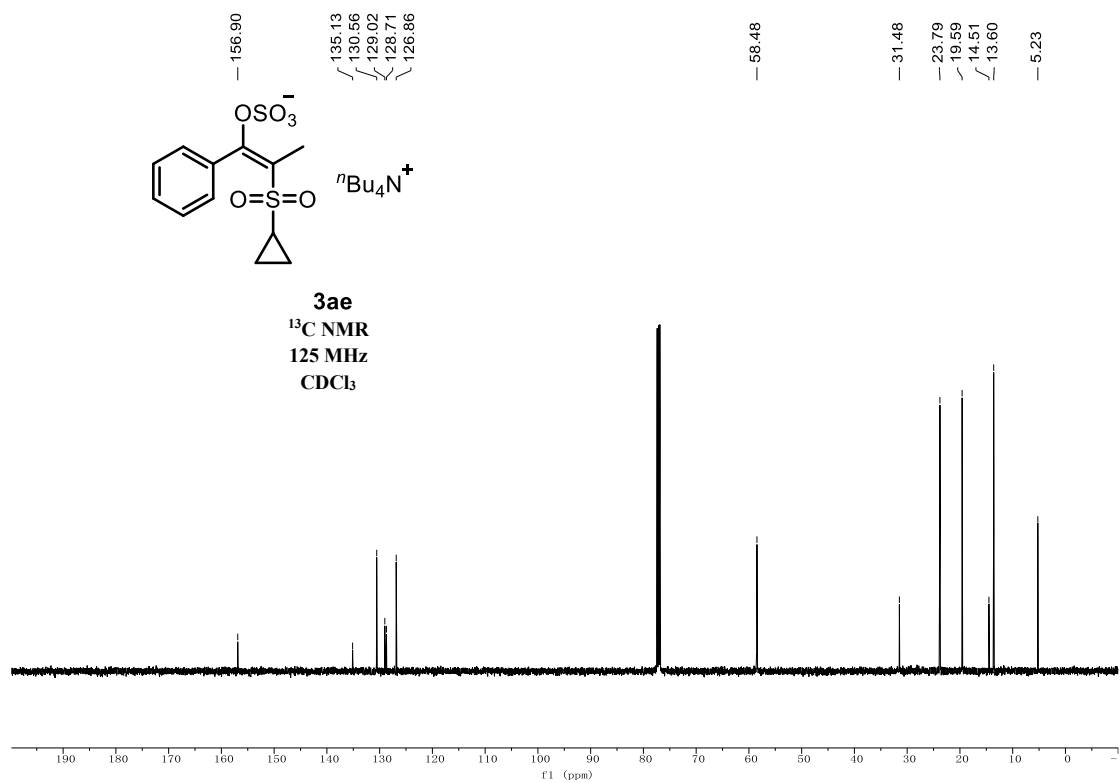

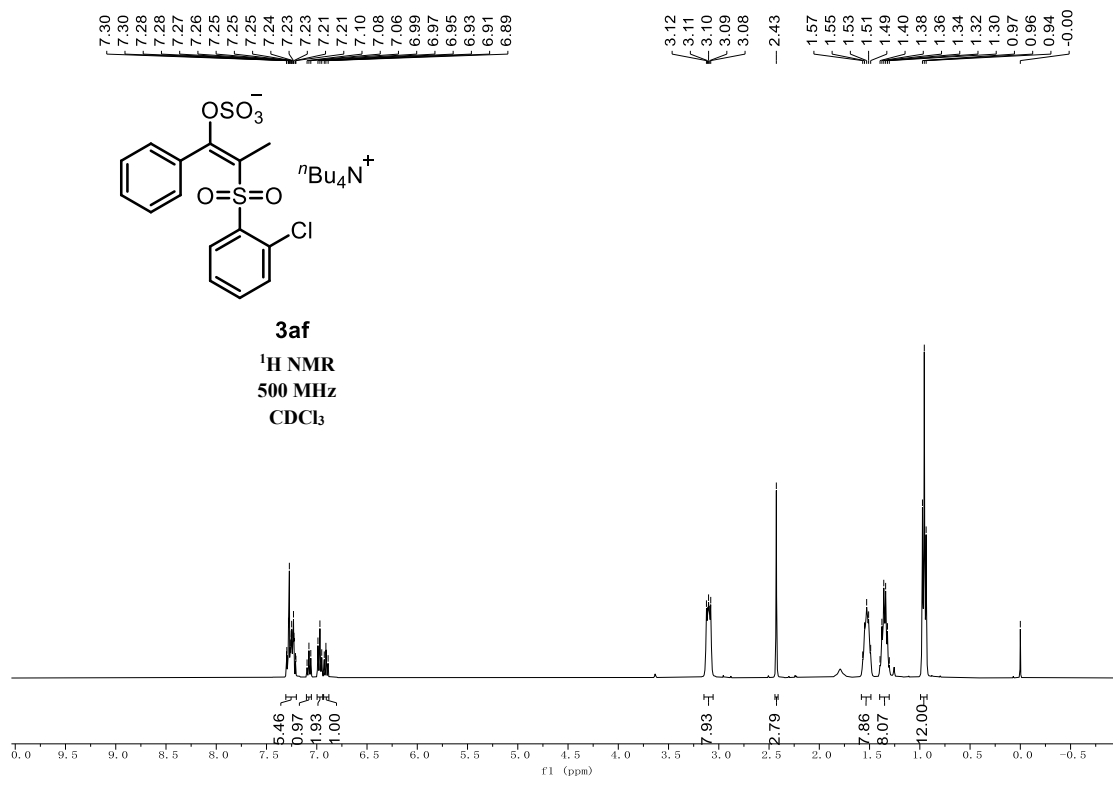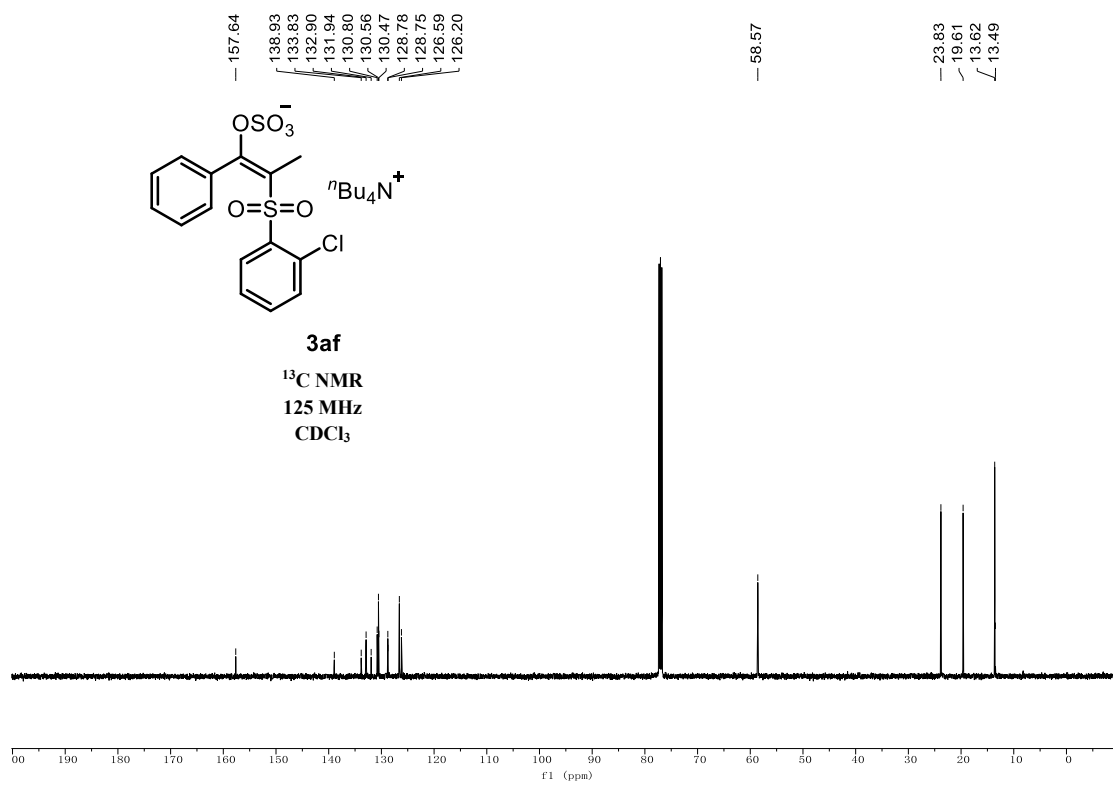



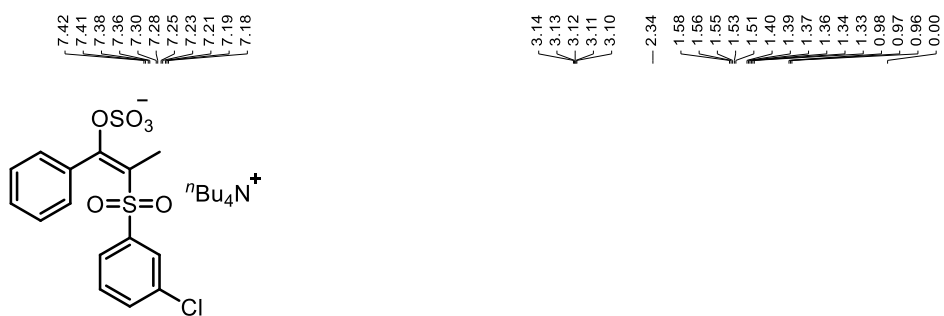

**3ag**

<sup>1</sup>H NMR  
500 MHz  
CDCl<sub>3</sub>

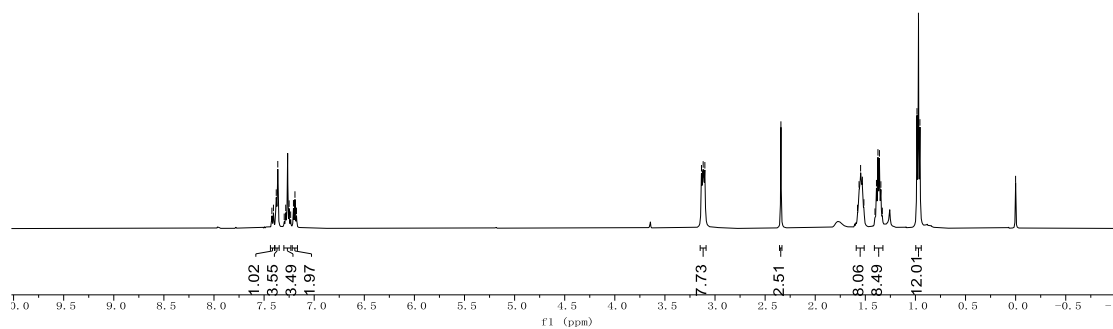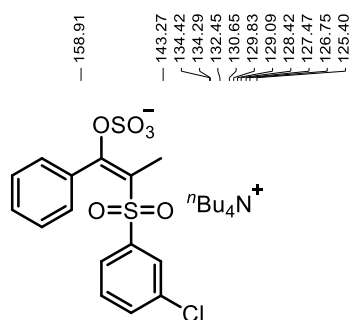

**3ag**

<sup>13</sup>C NMR  
125 MHz  
CDCl<sub>3</sub>

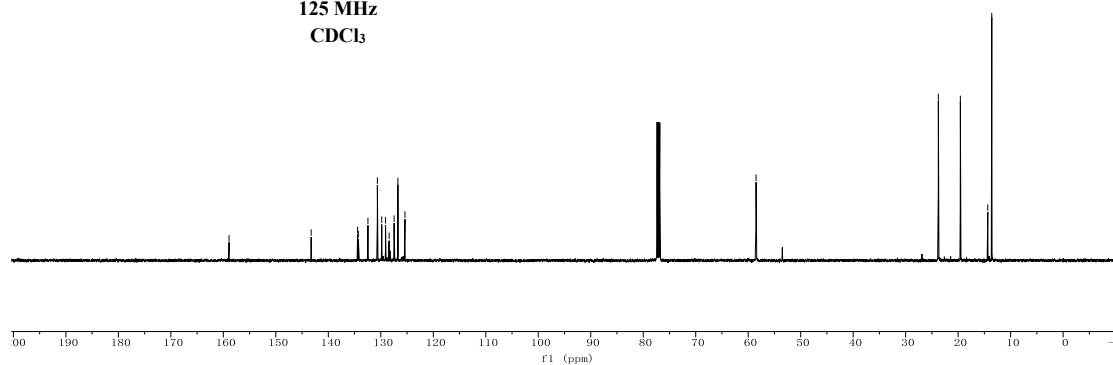

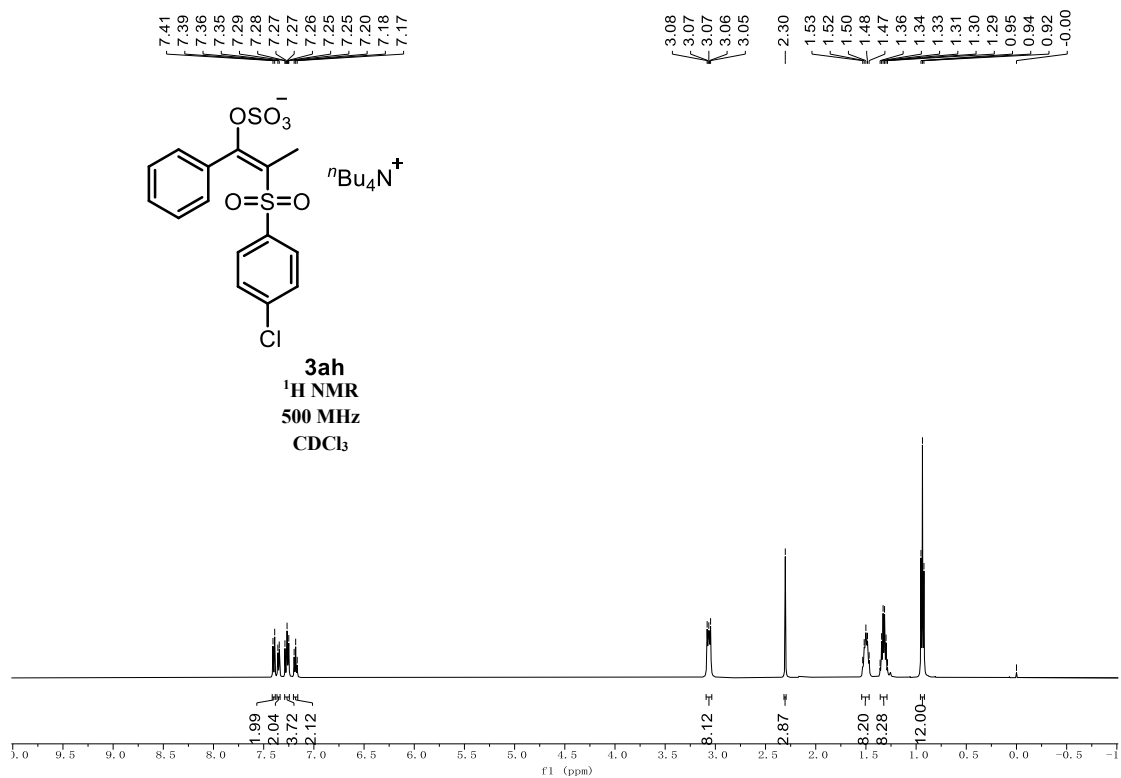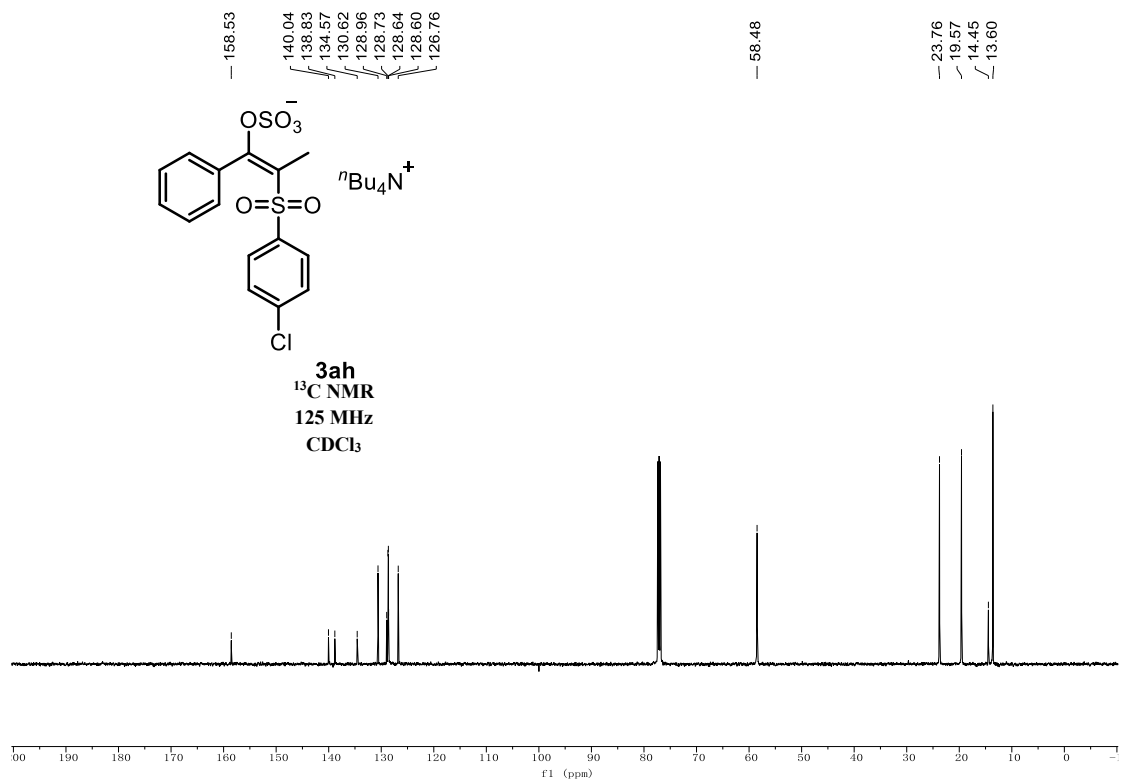

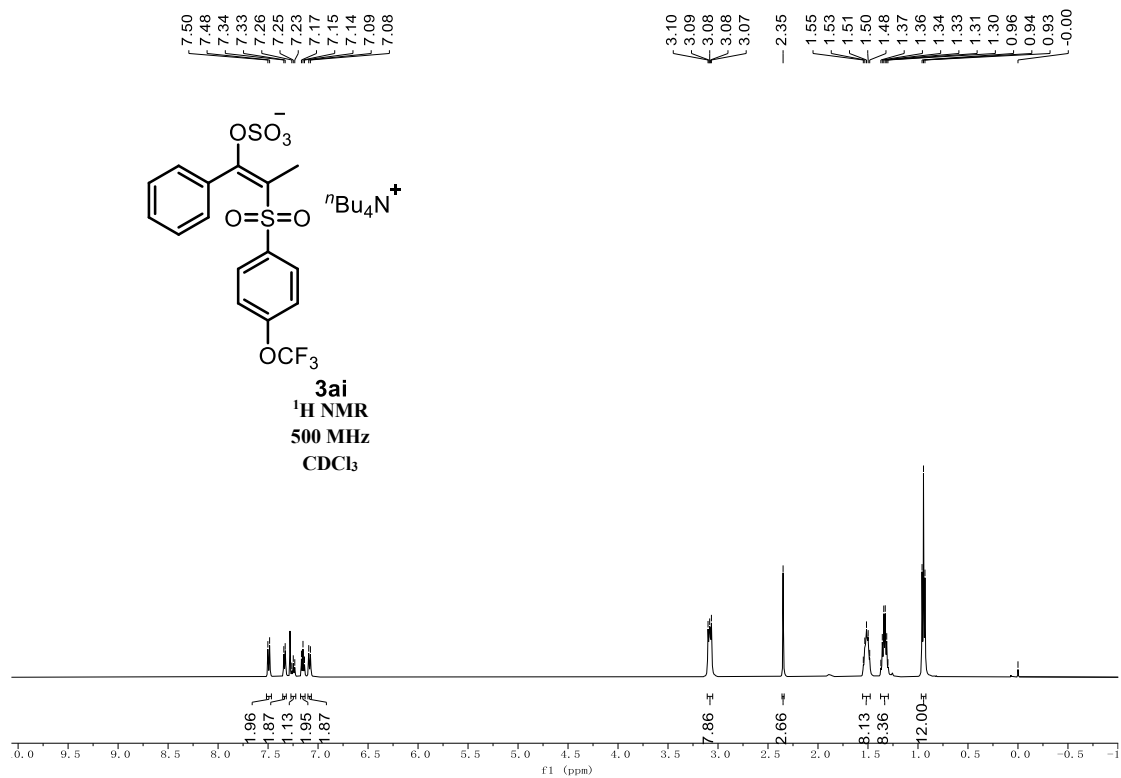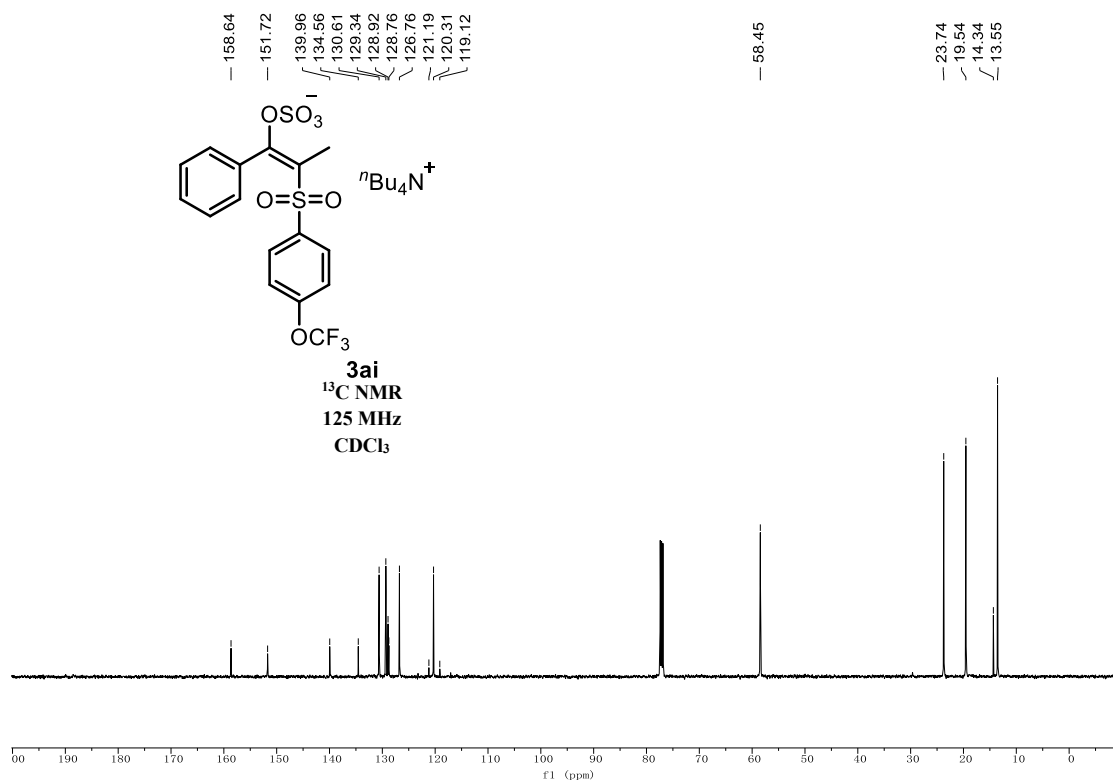

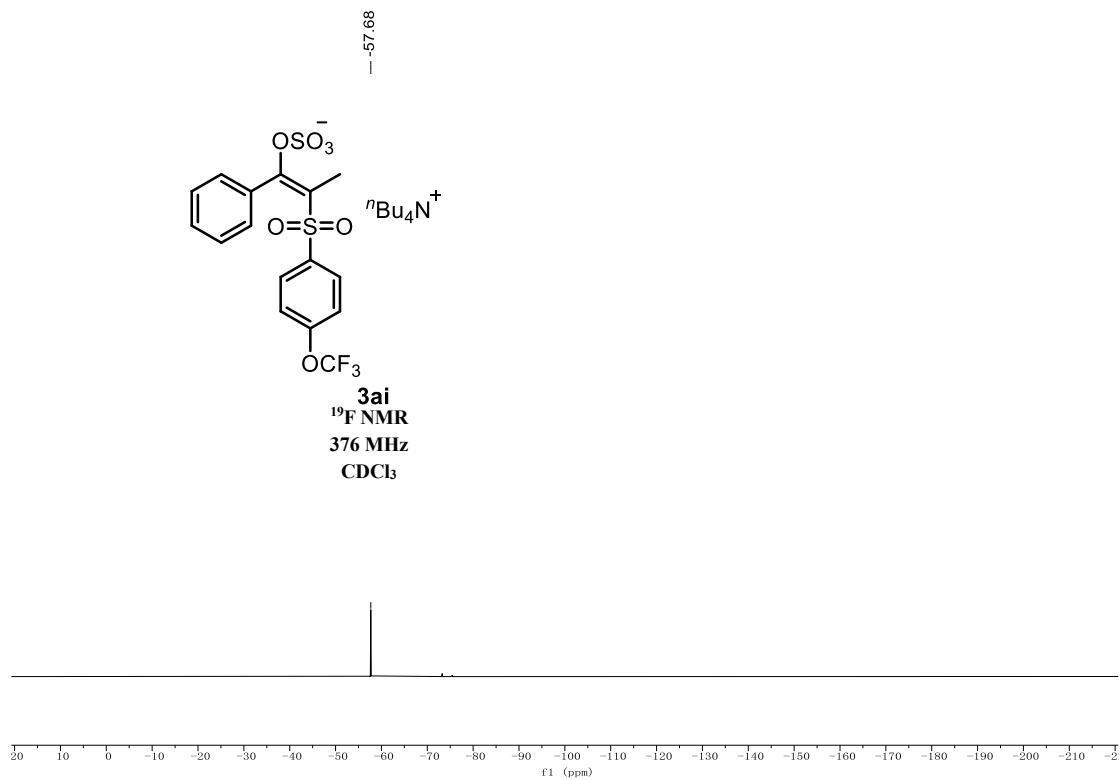

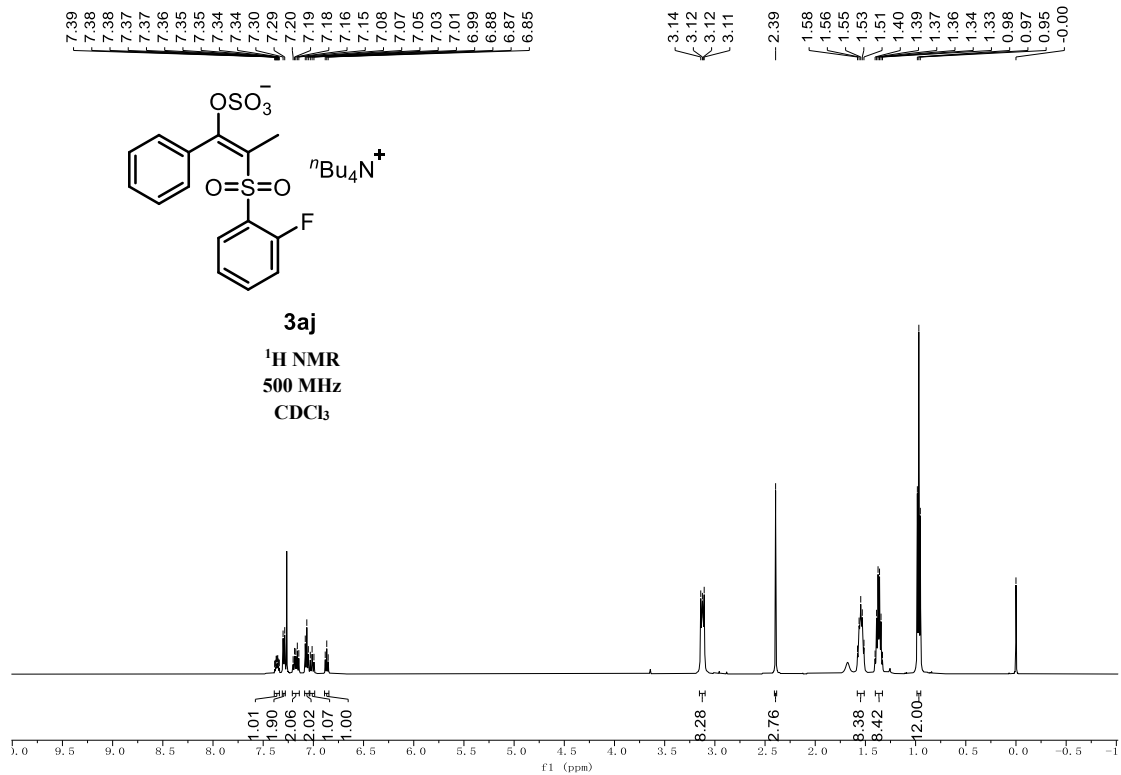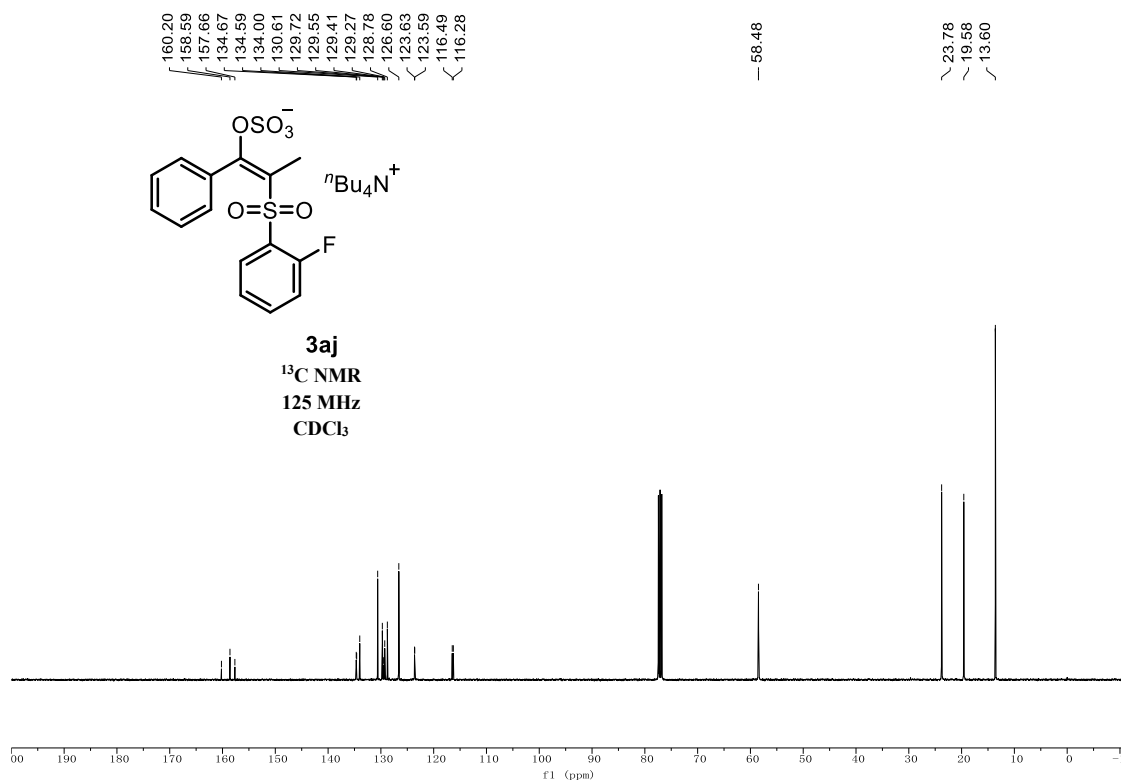

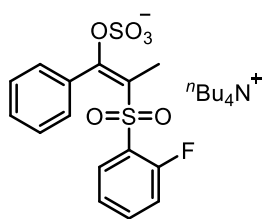

**3aj**  
 $^{19}\text{F}$  NMR  
376 MHz  
 $\text{CDCl}_3$

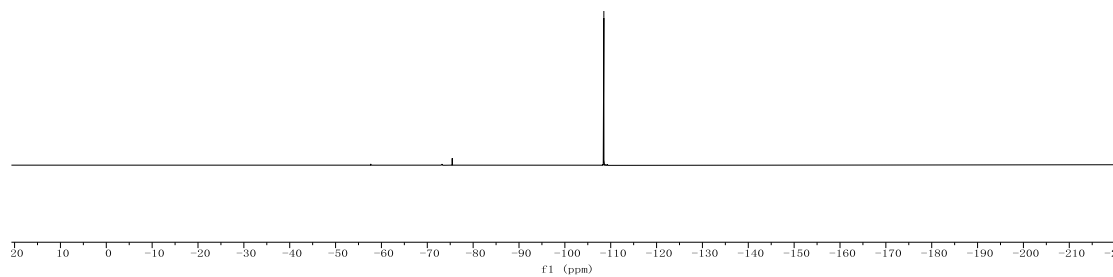

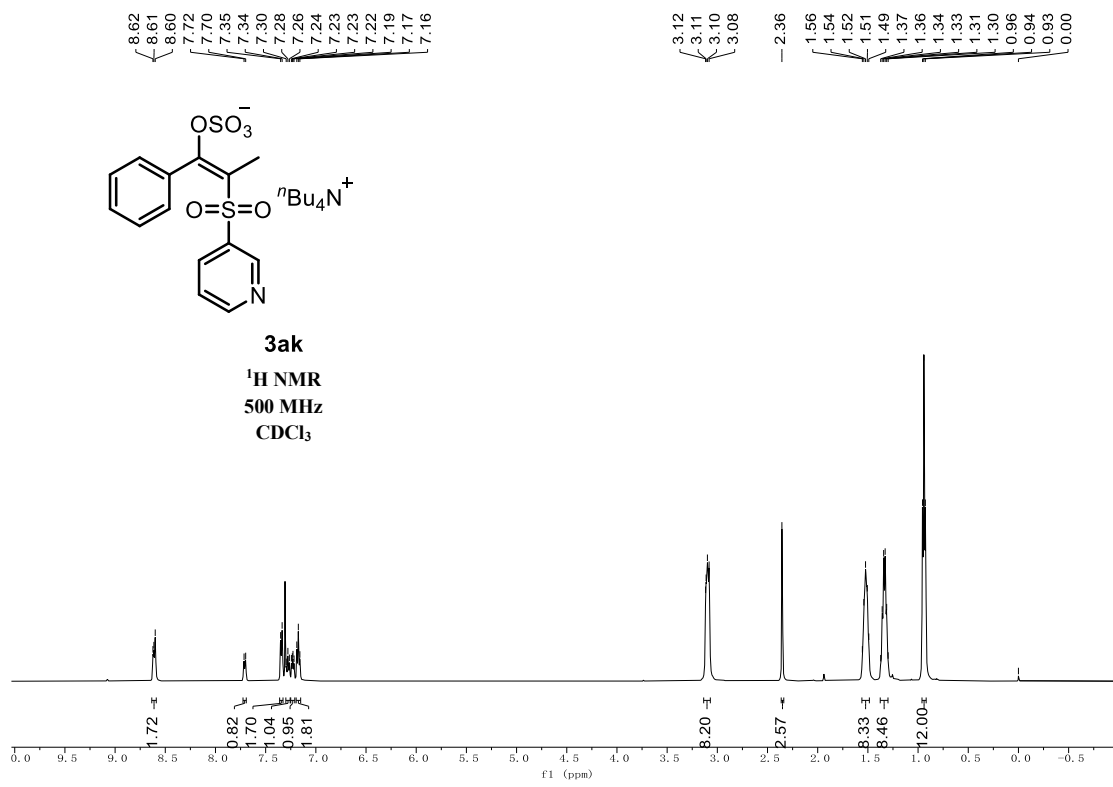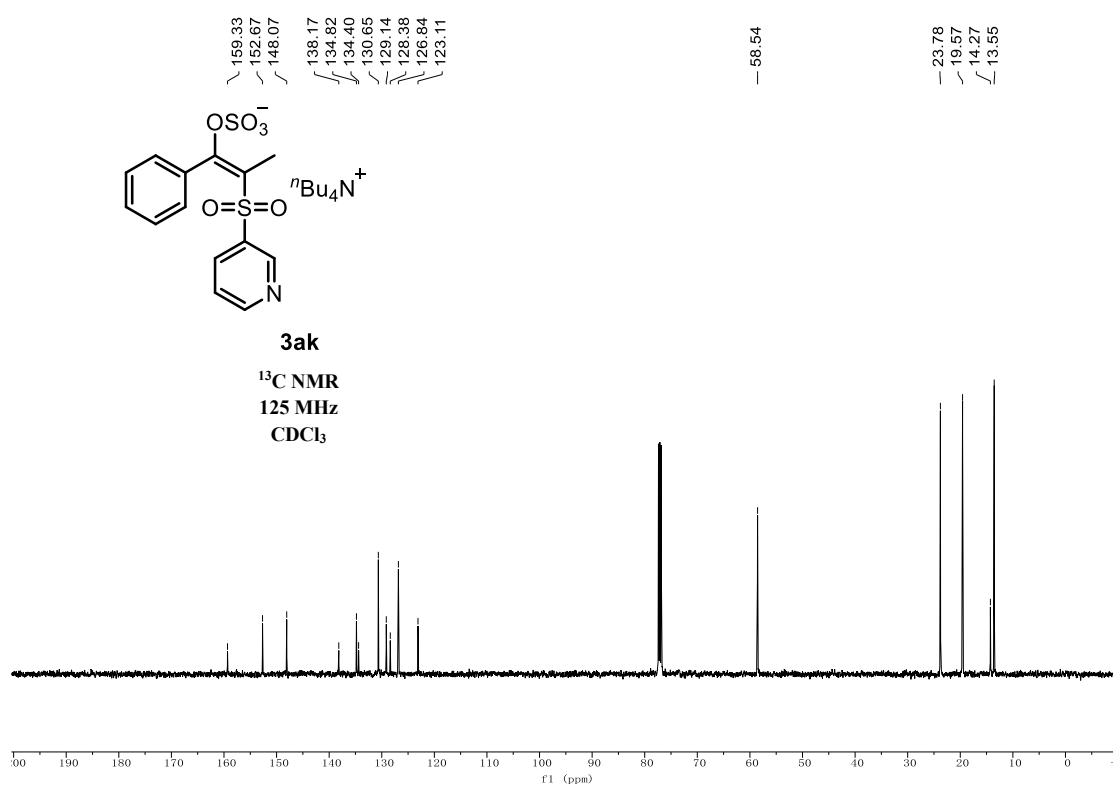

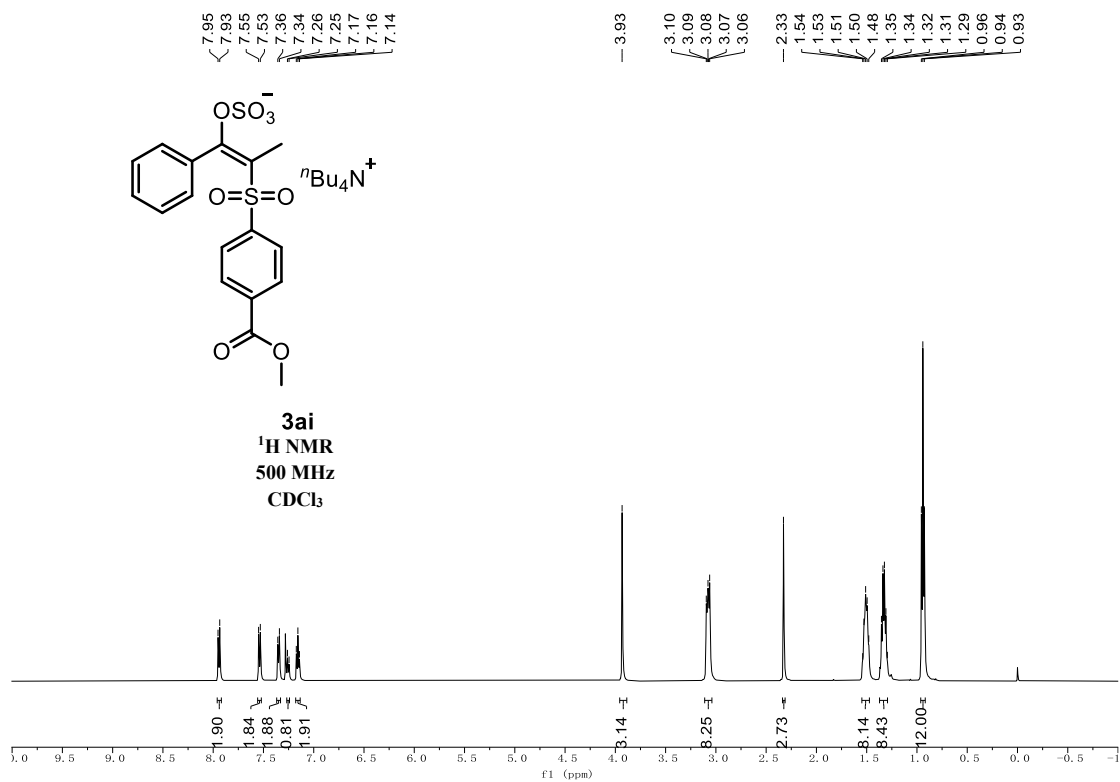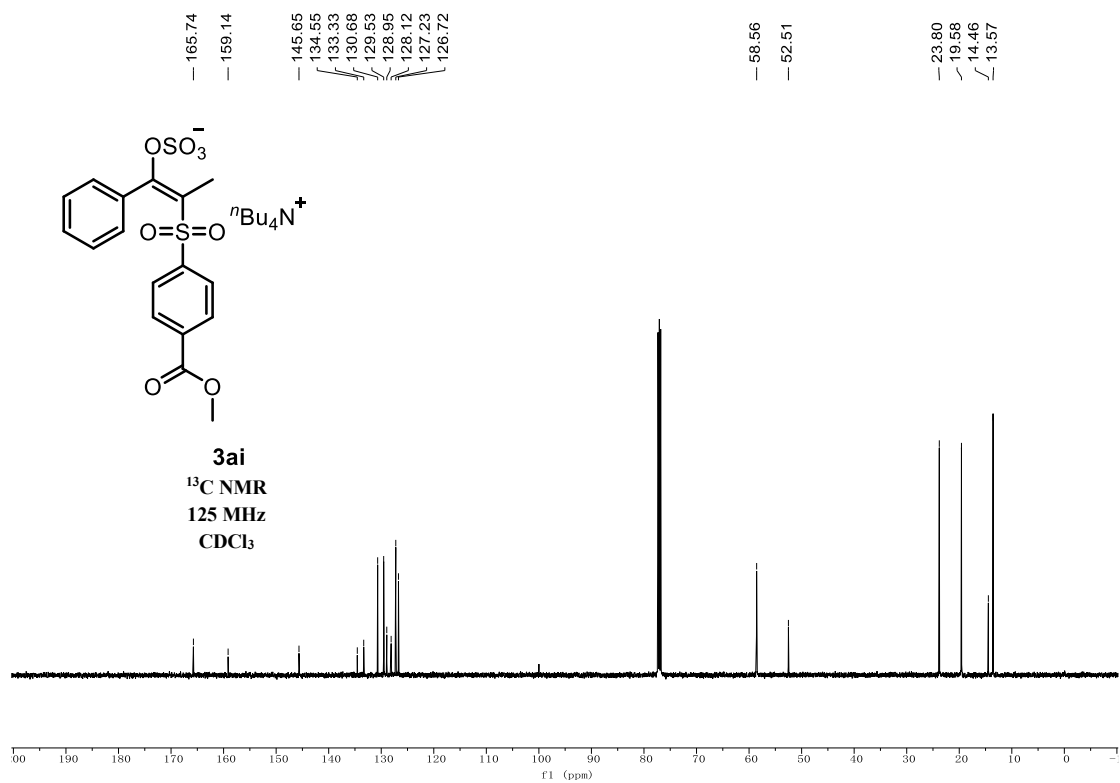



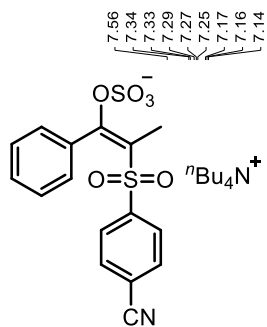

**3am**

$^1\text{H NMR}$   
500 MHz  
 $\text{CDCl}_3$

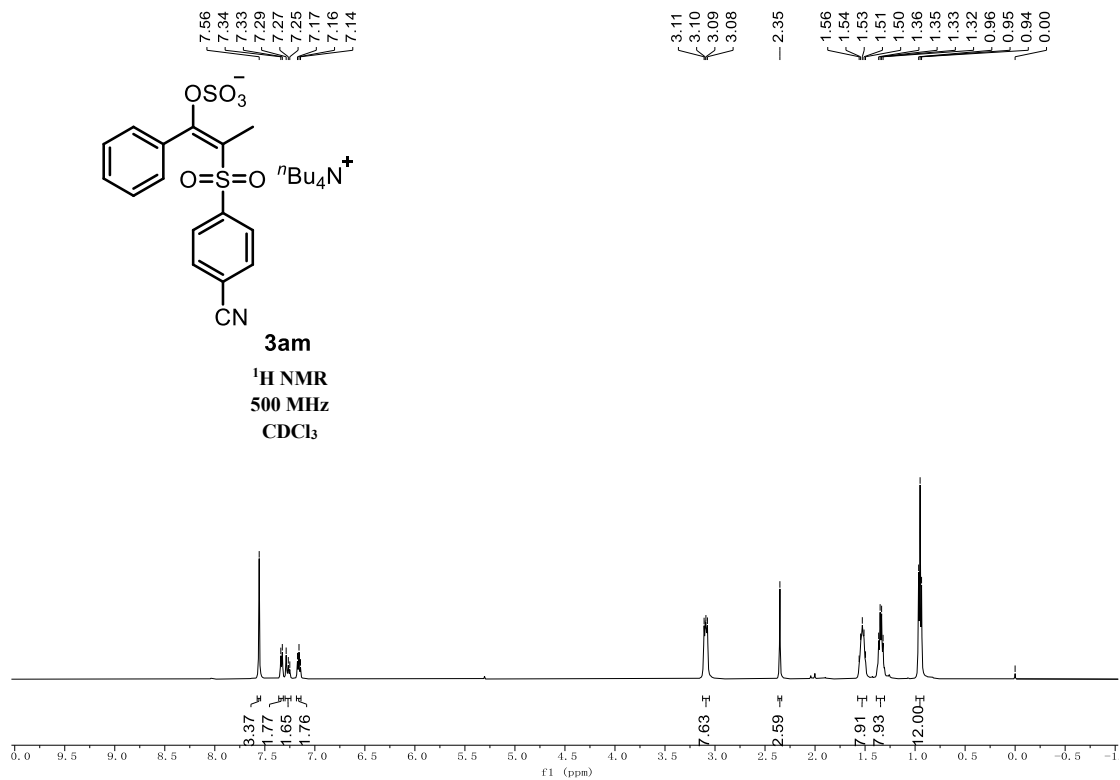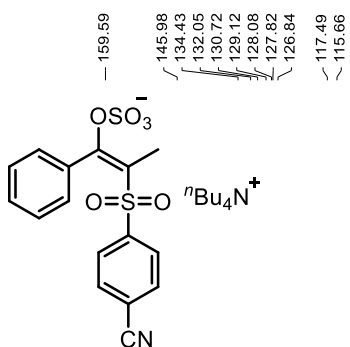

**3am**

$^{13}\text{C NMR}$   
125 MHz  
 $\text{CDCl}_3$

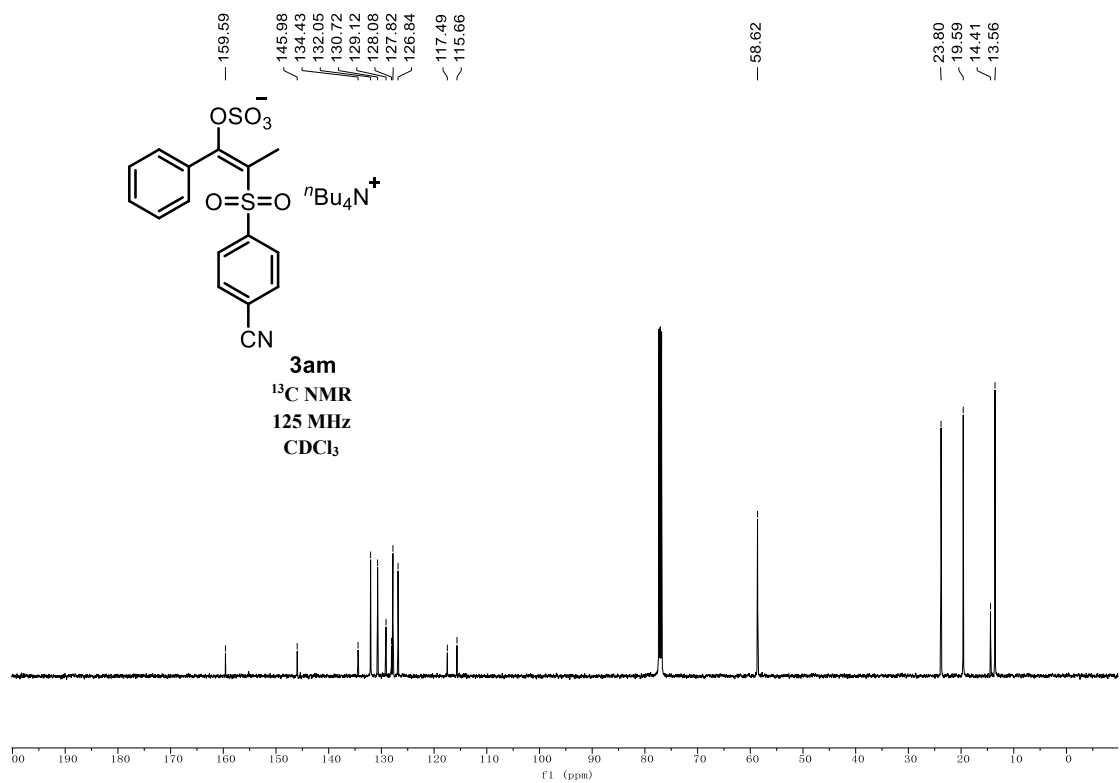

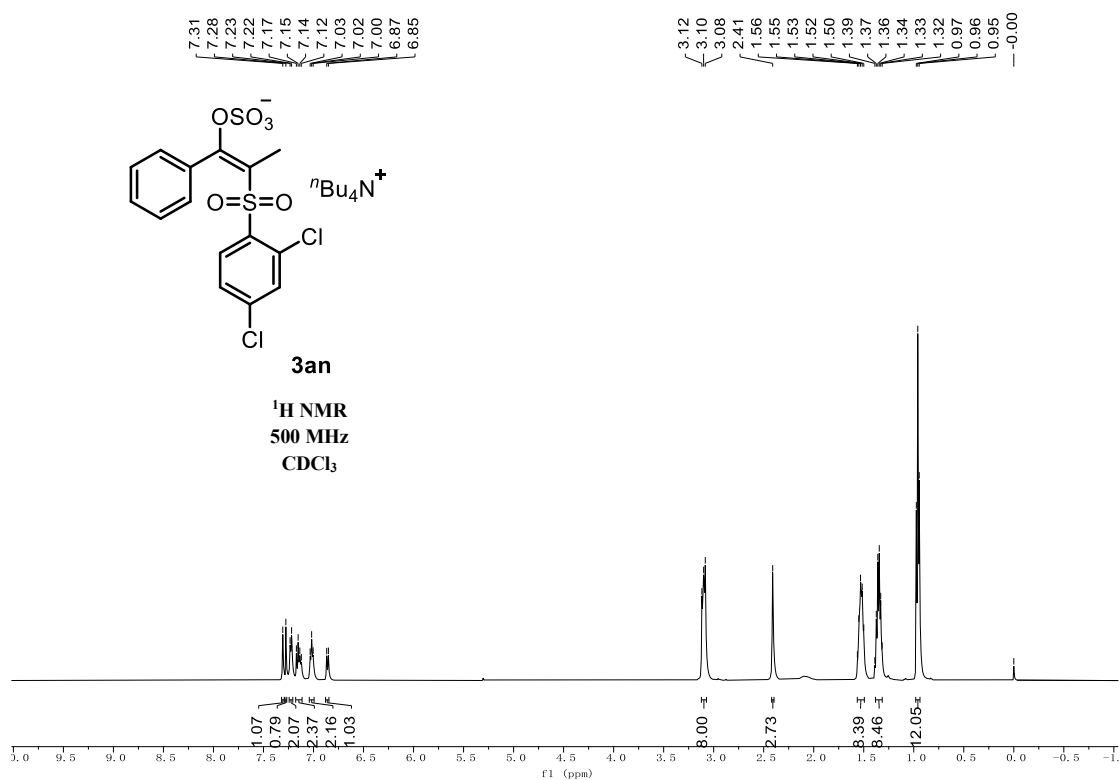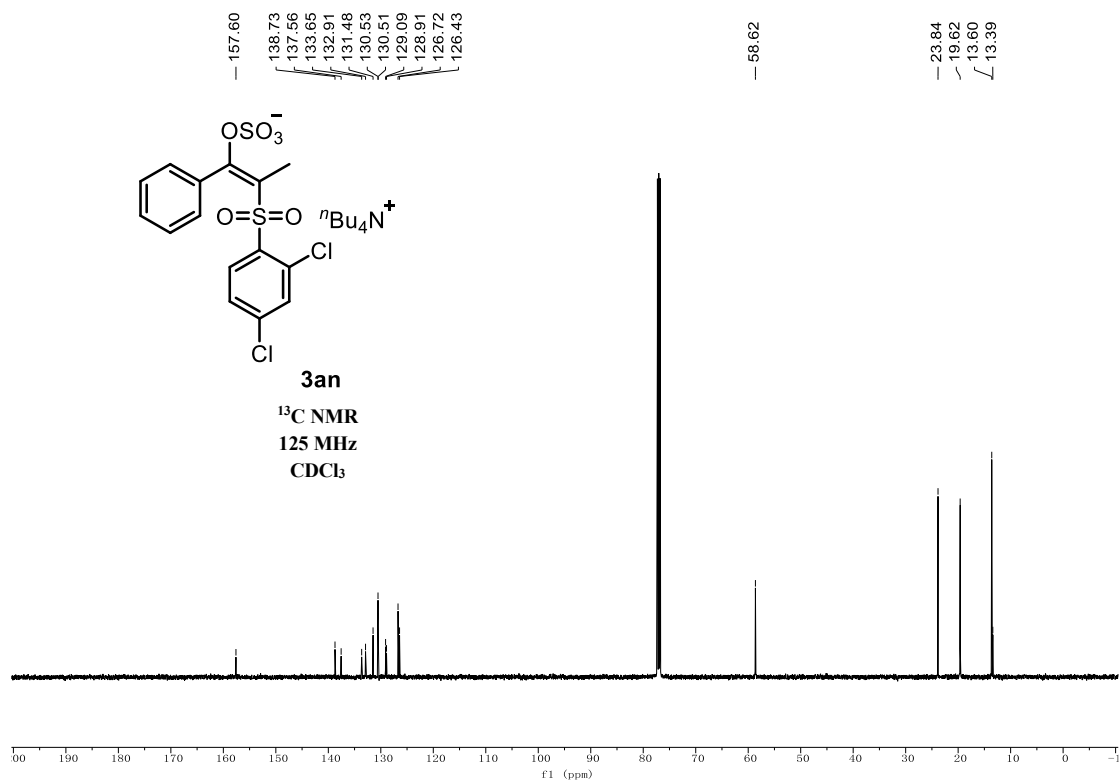

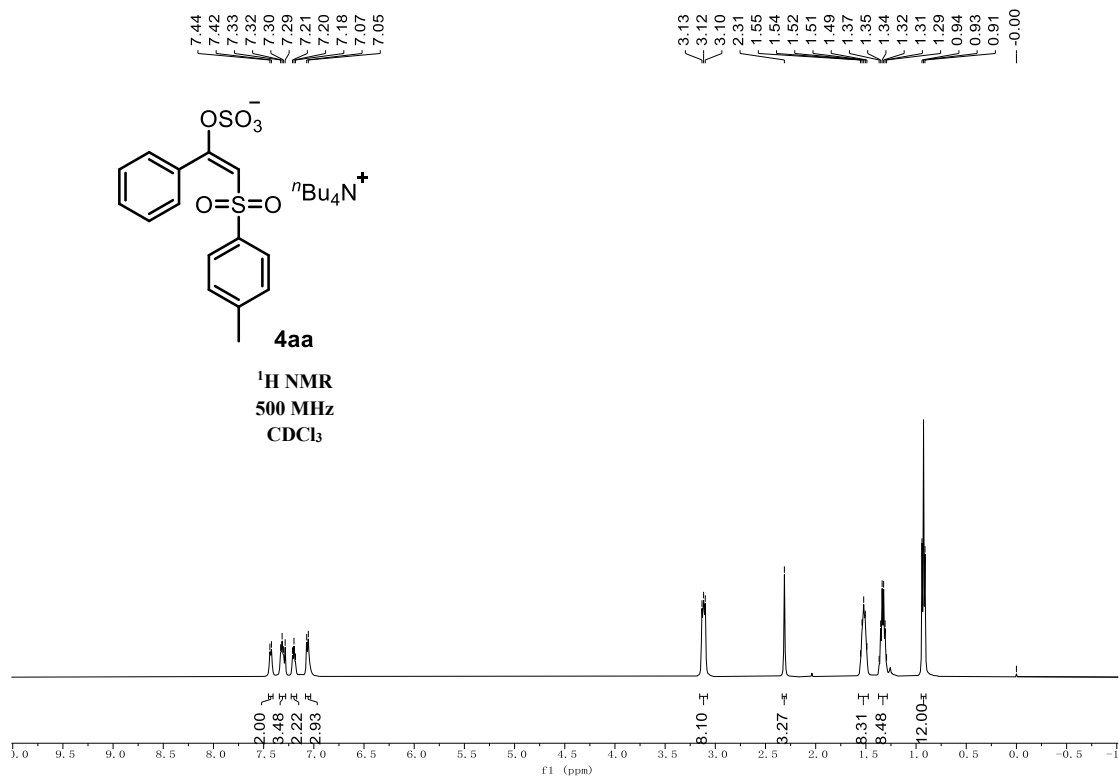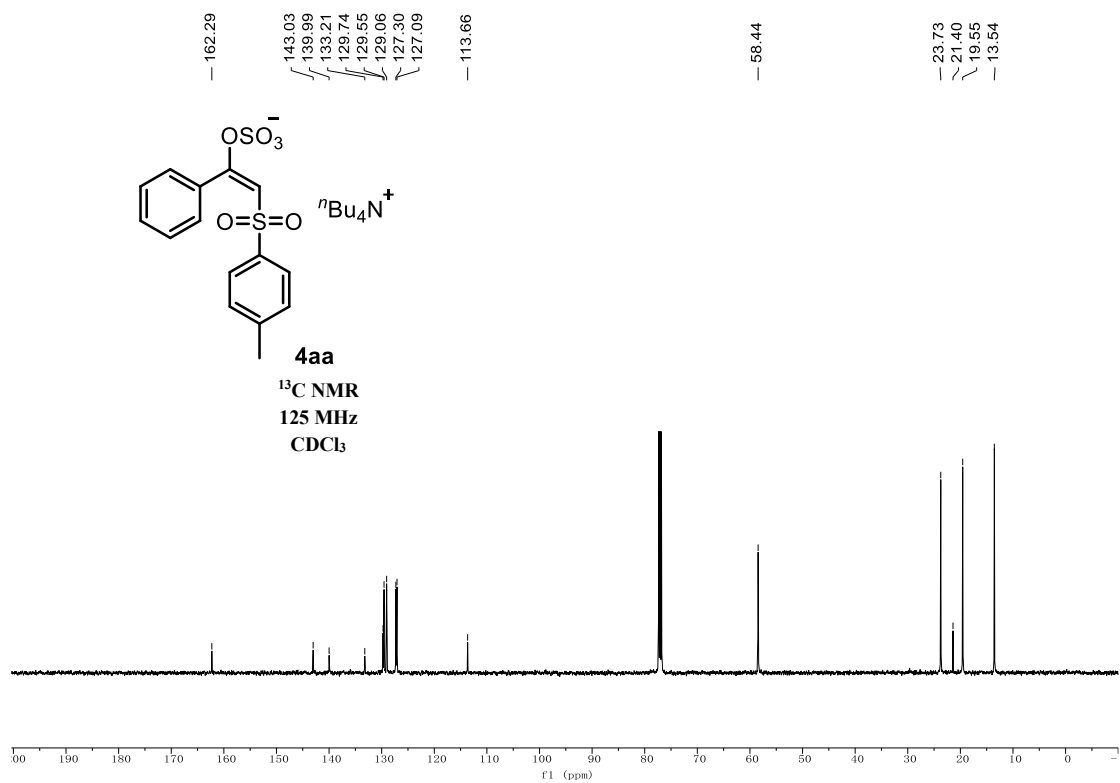

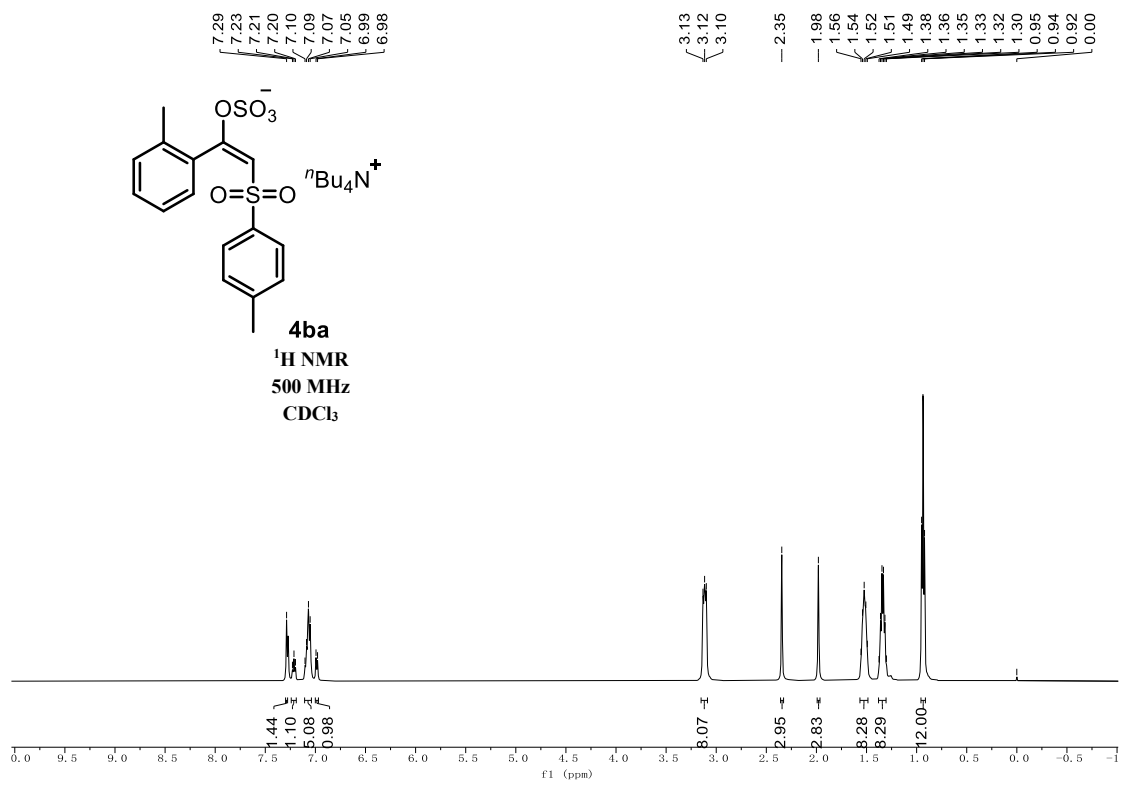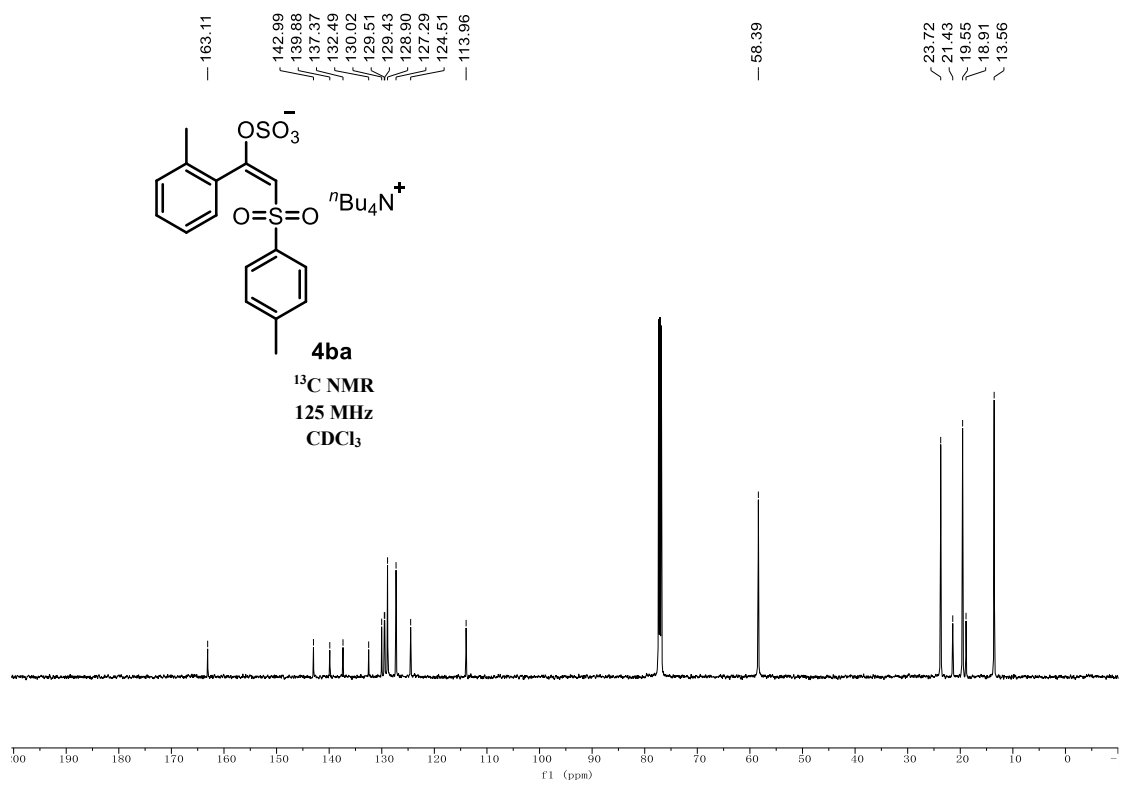

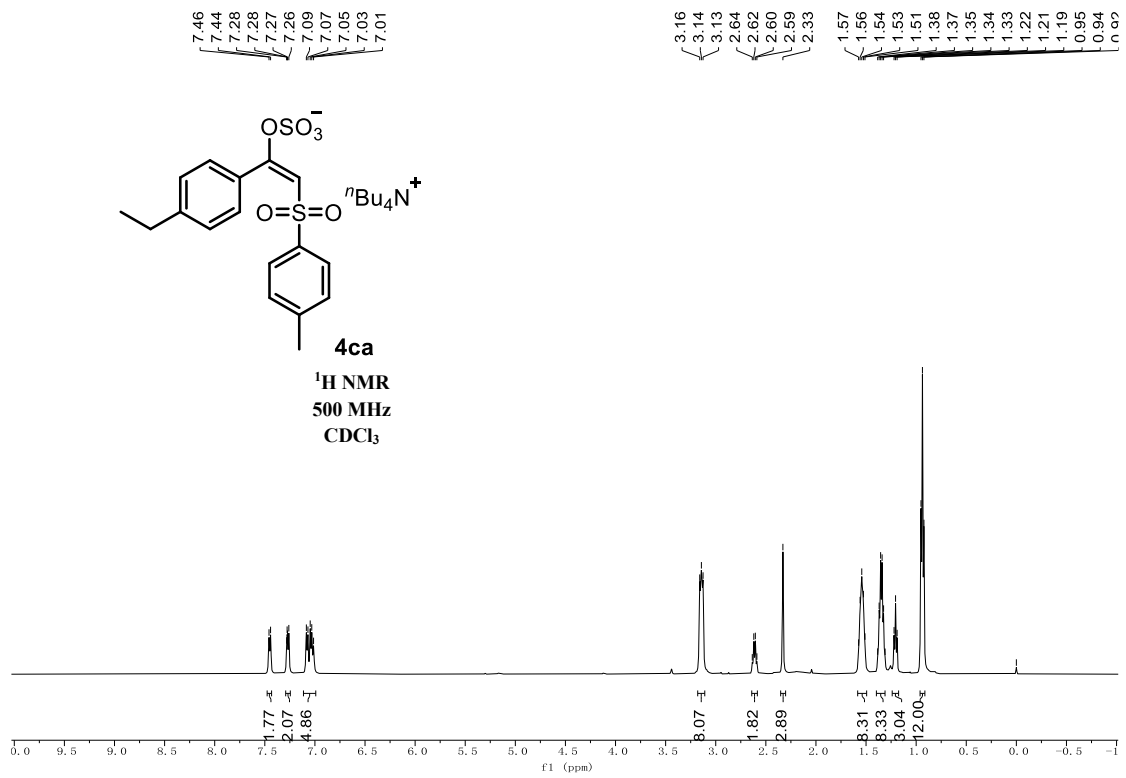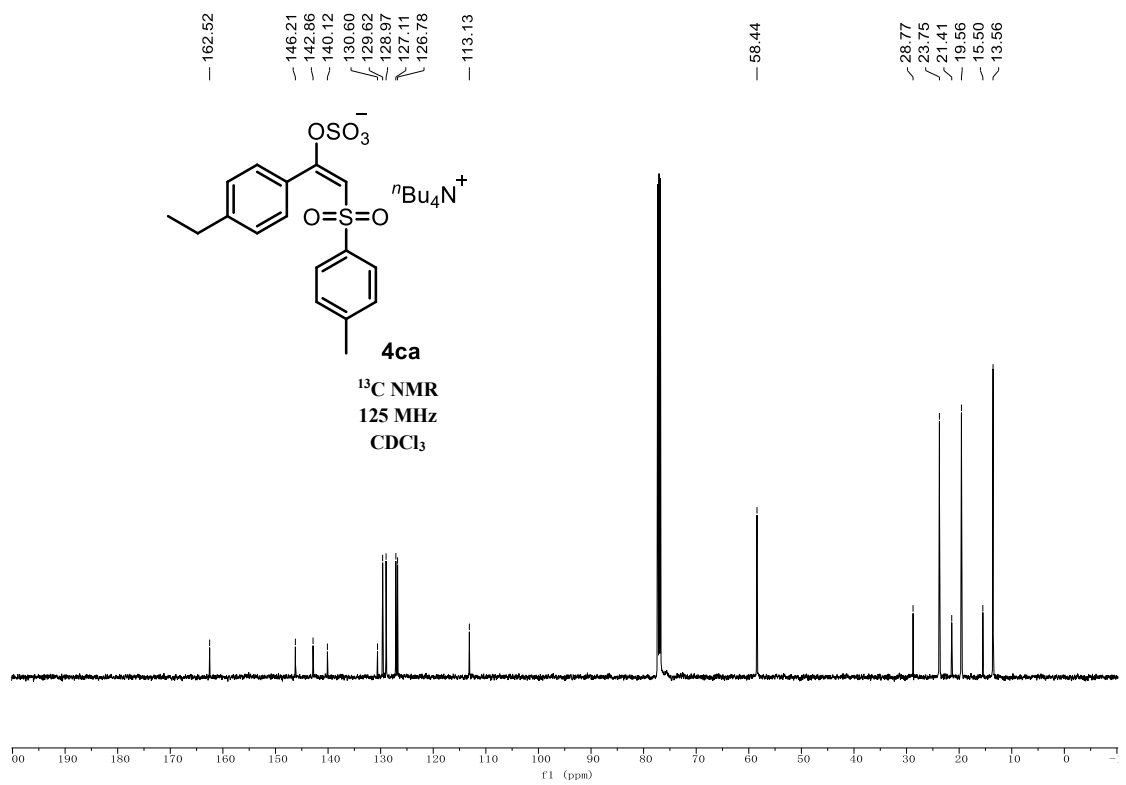

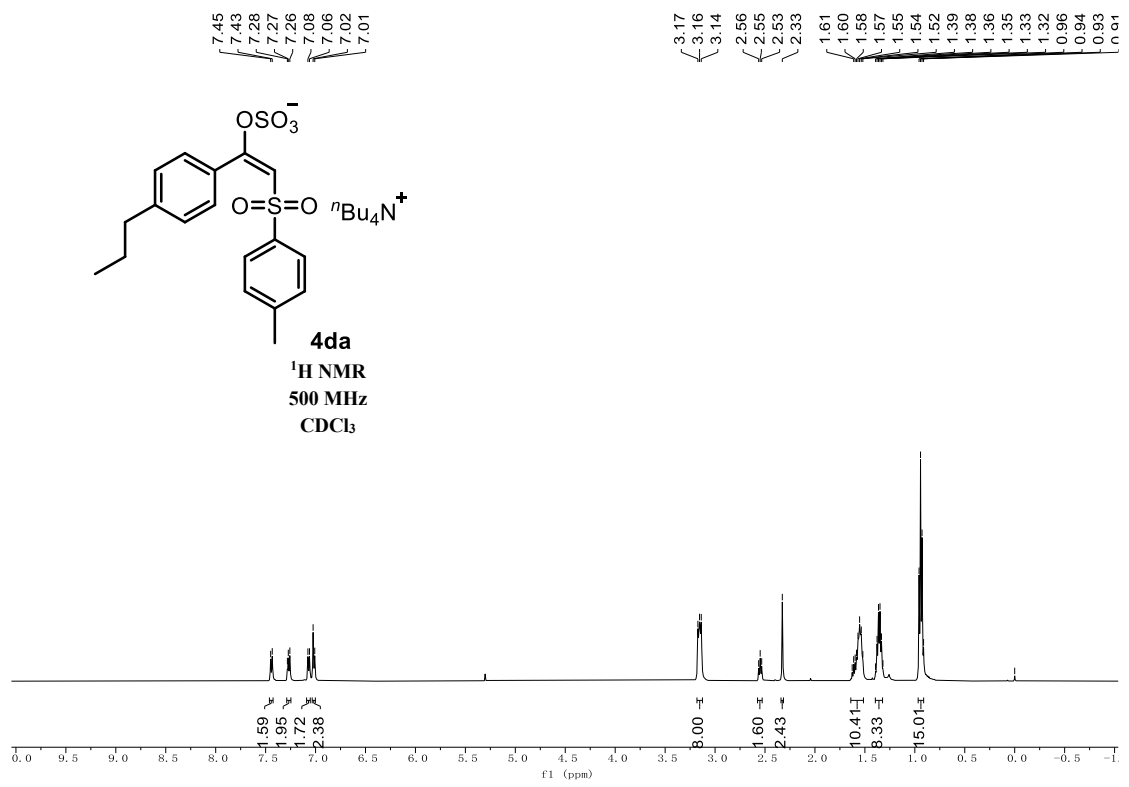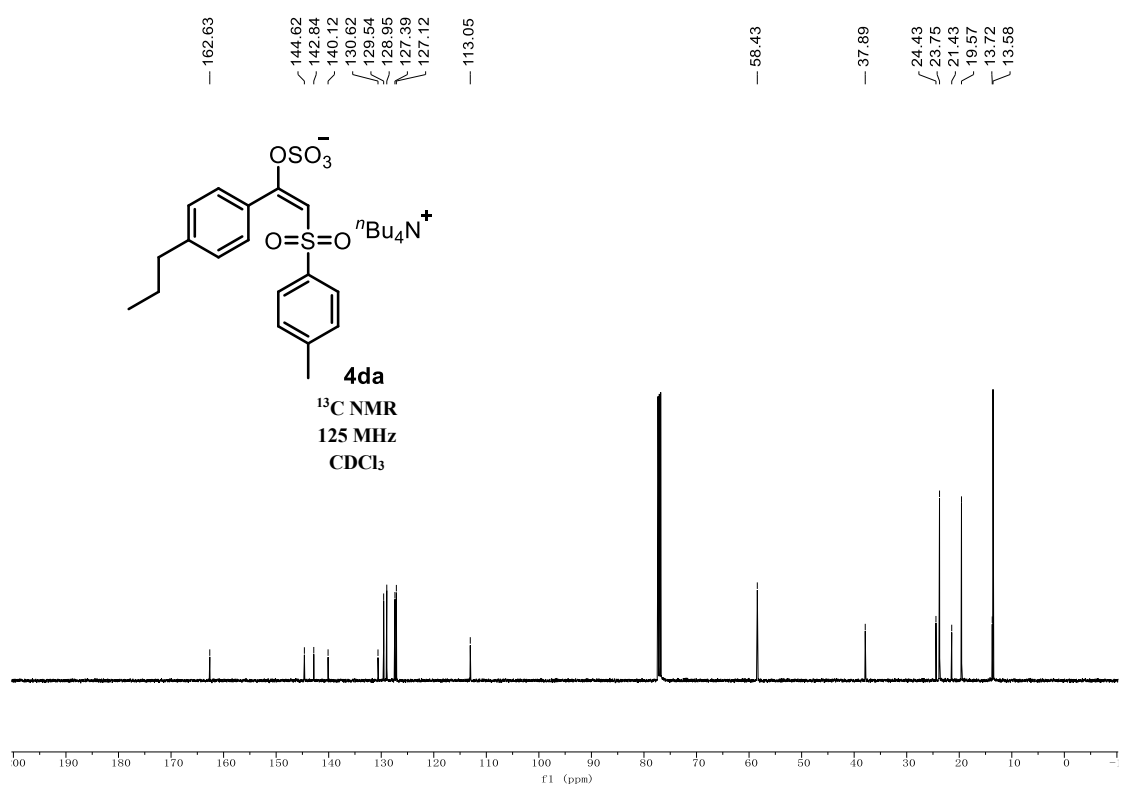

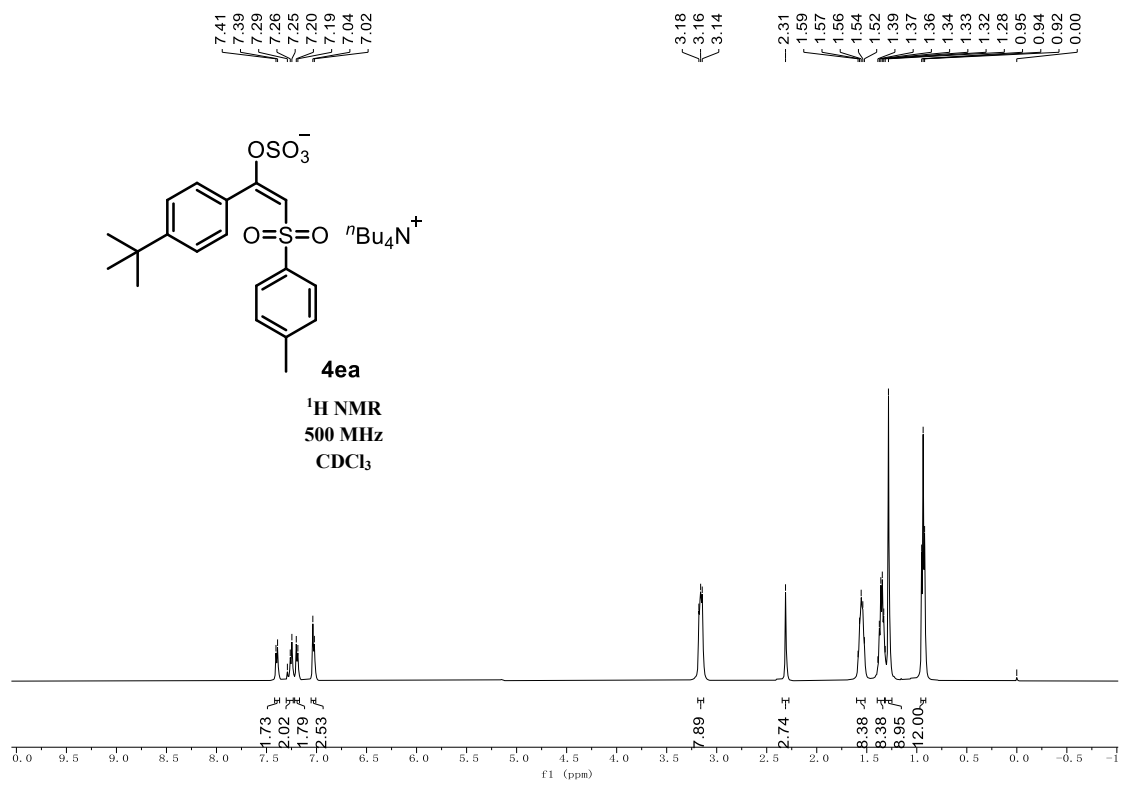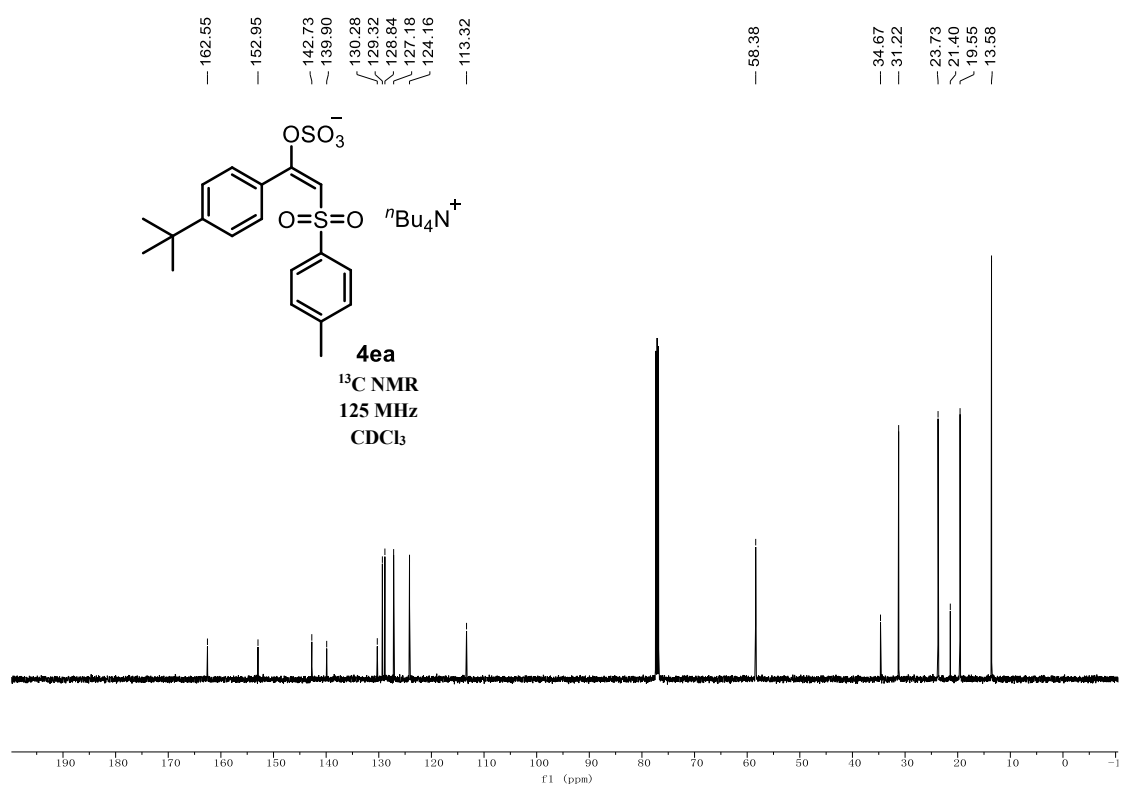

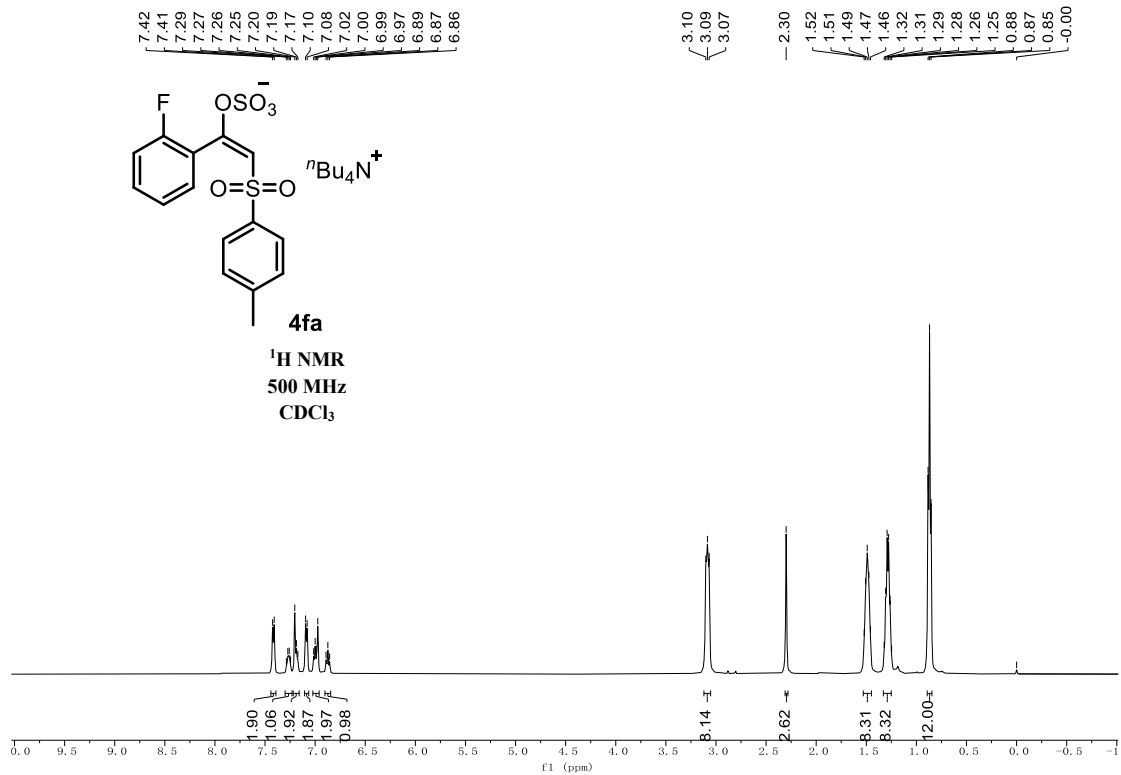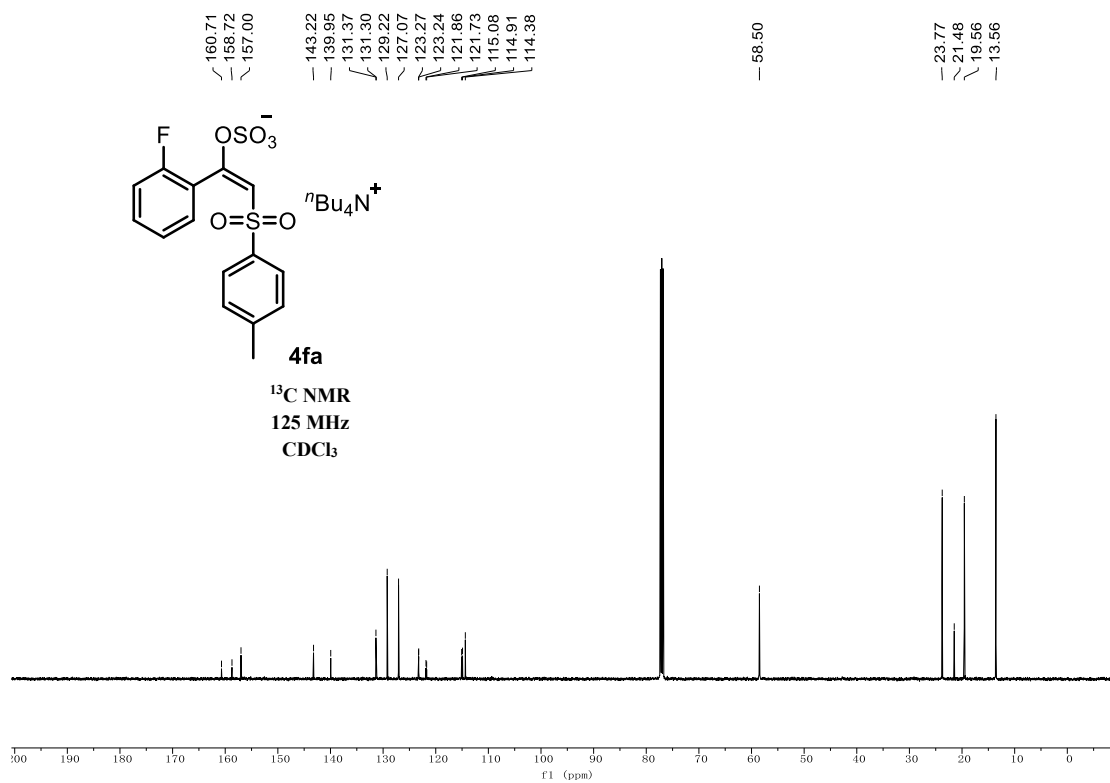



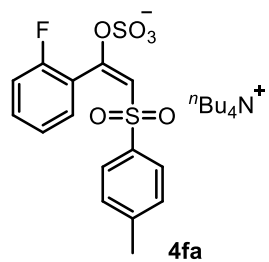

<sup>19</sup>F NMR  
376 MHz  
CDCl<sub>3</sub>

-112.74

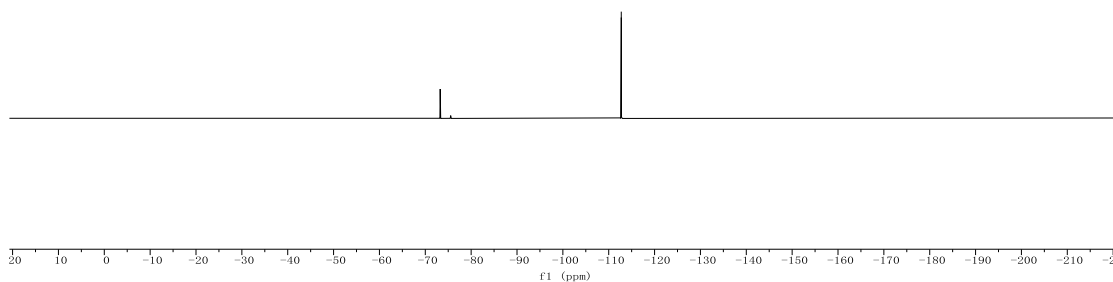

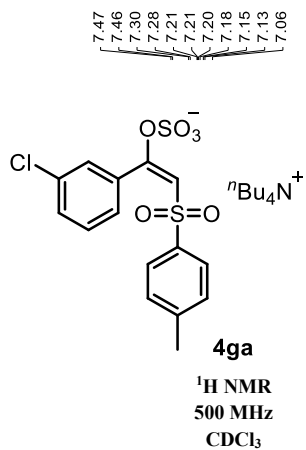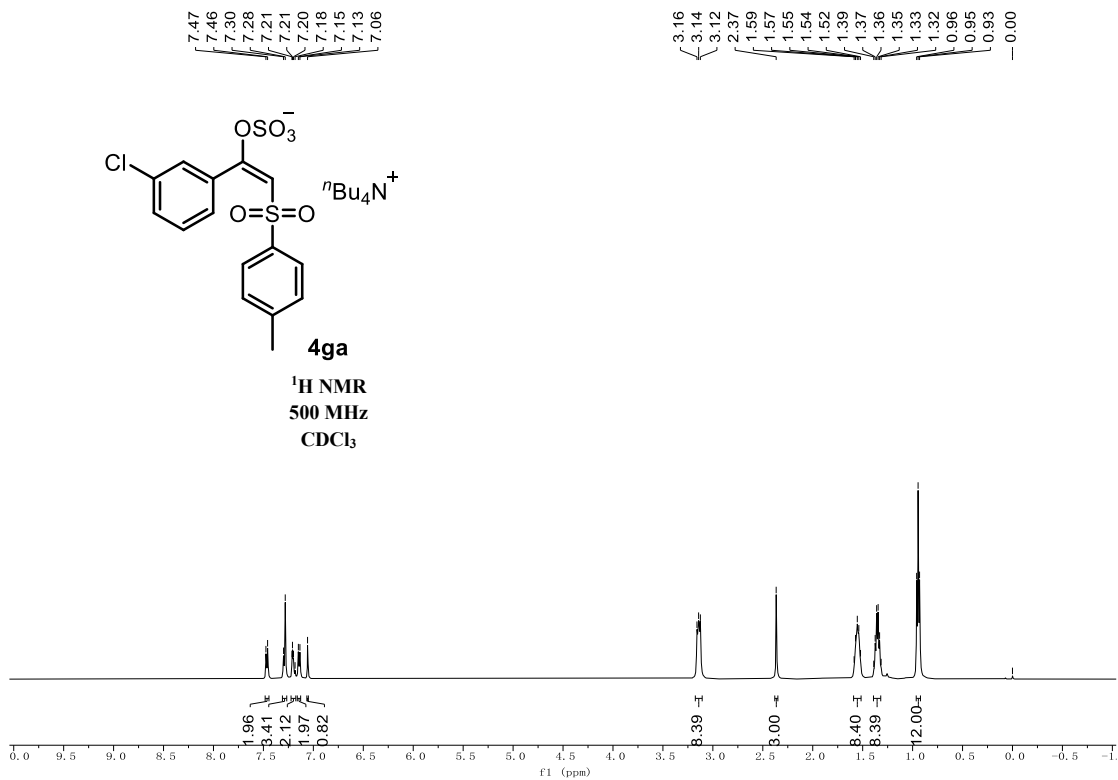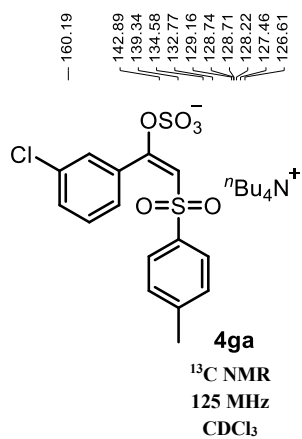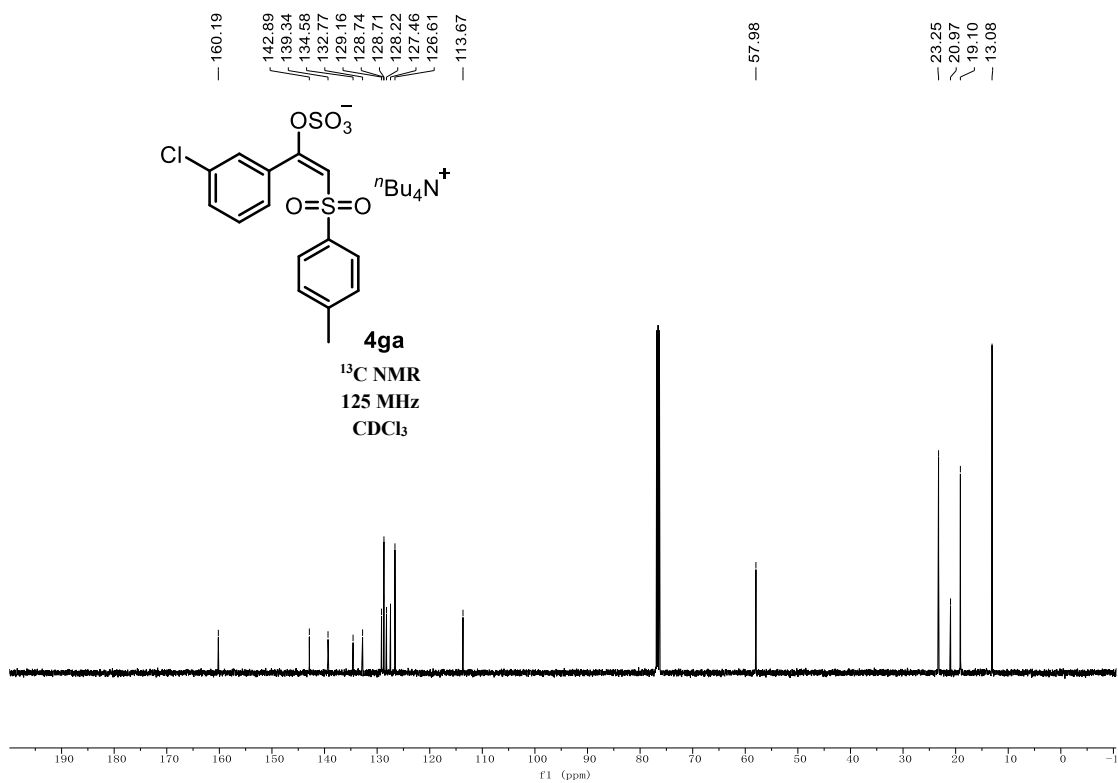

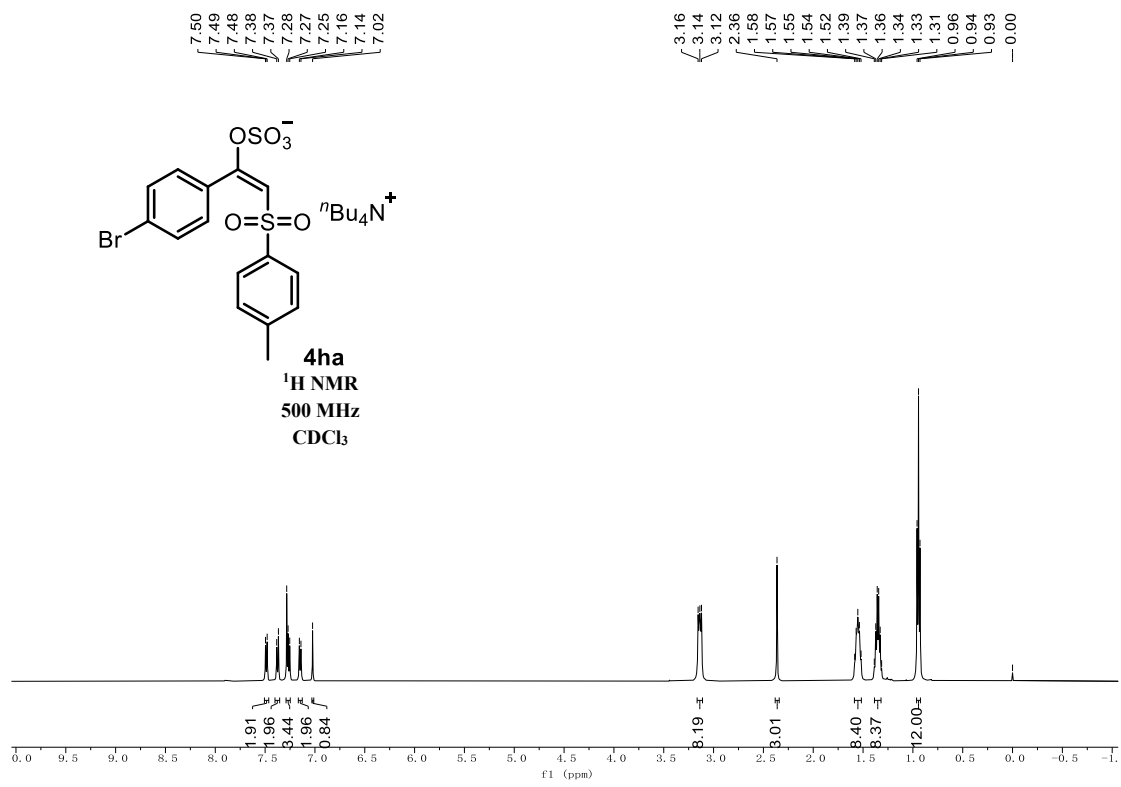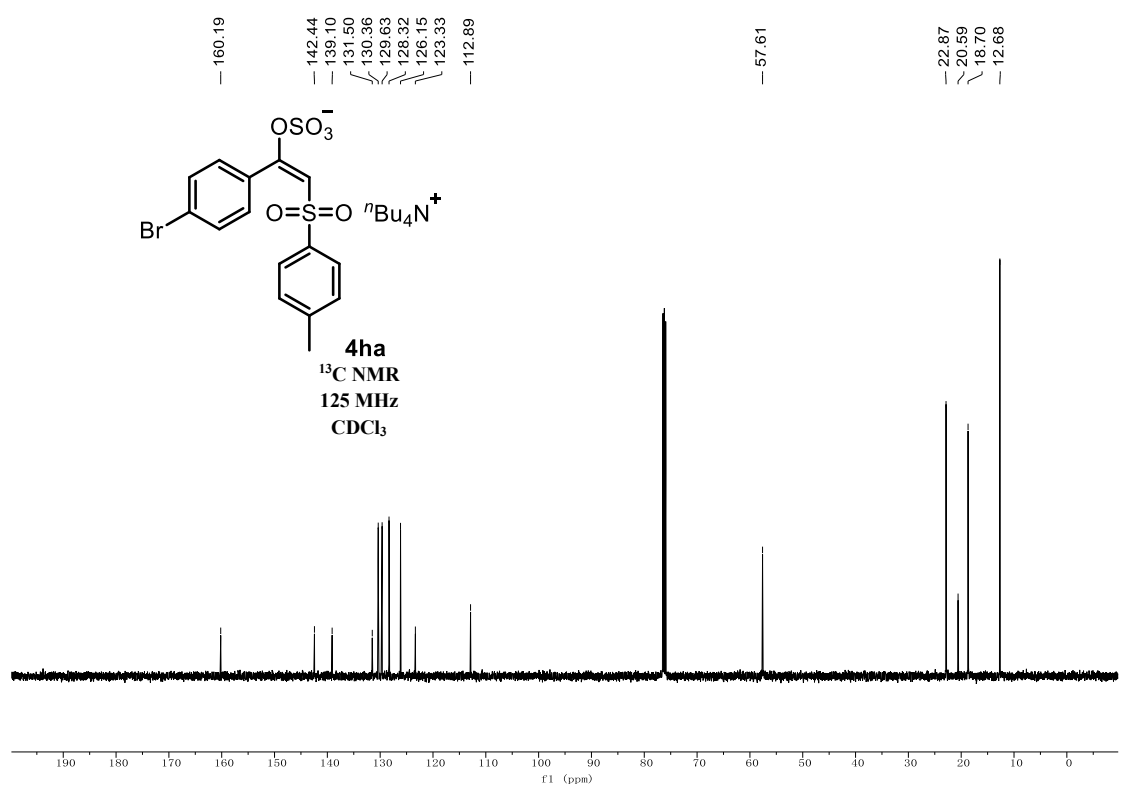

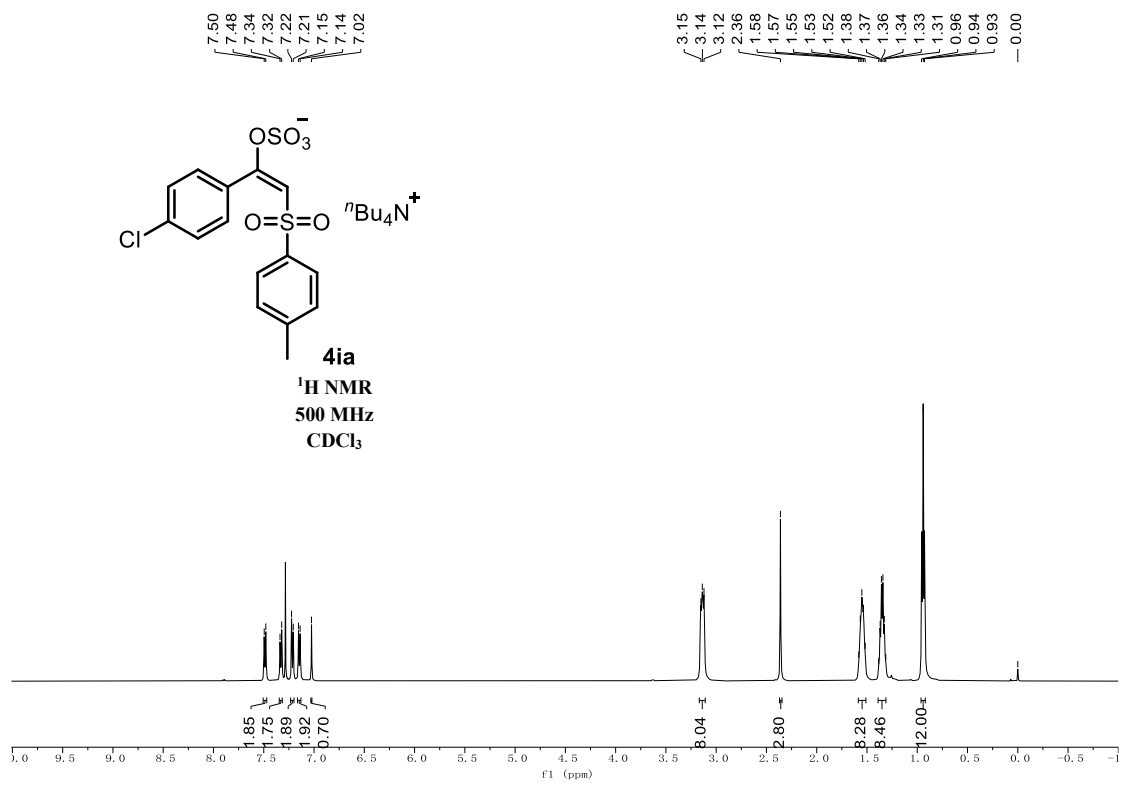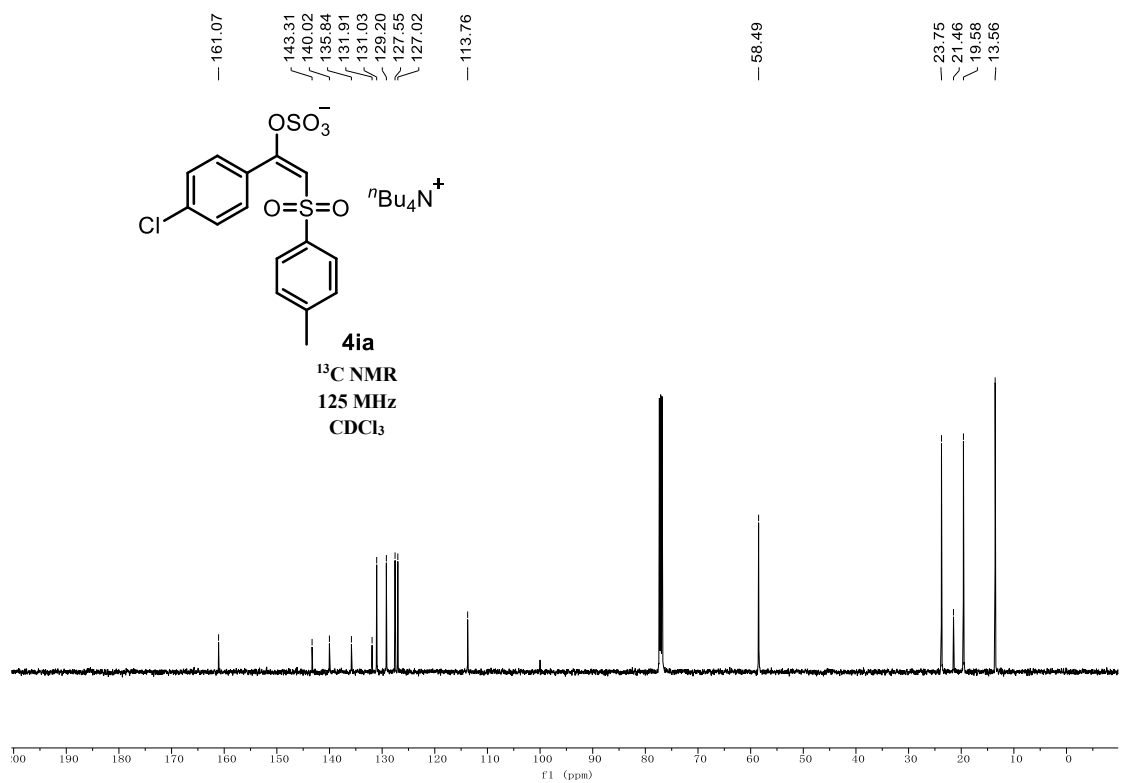

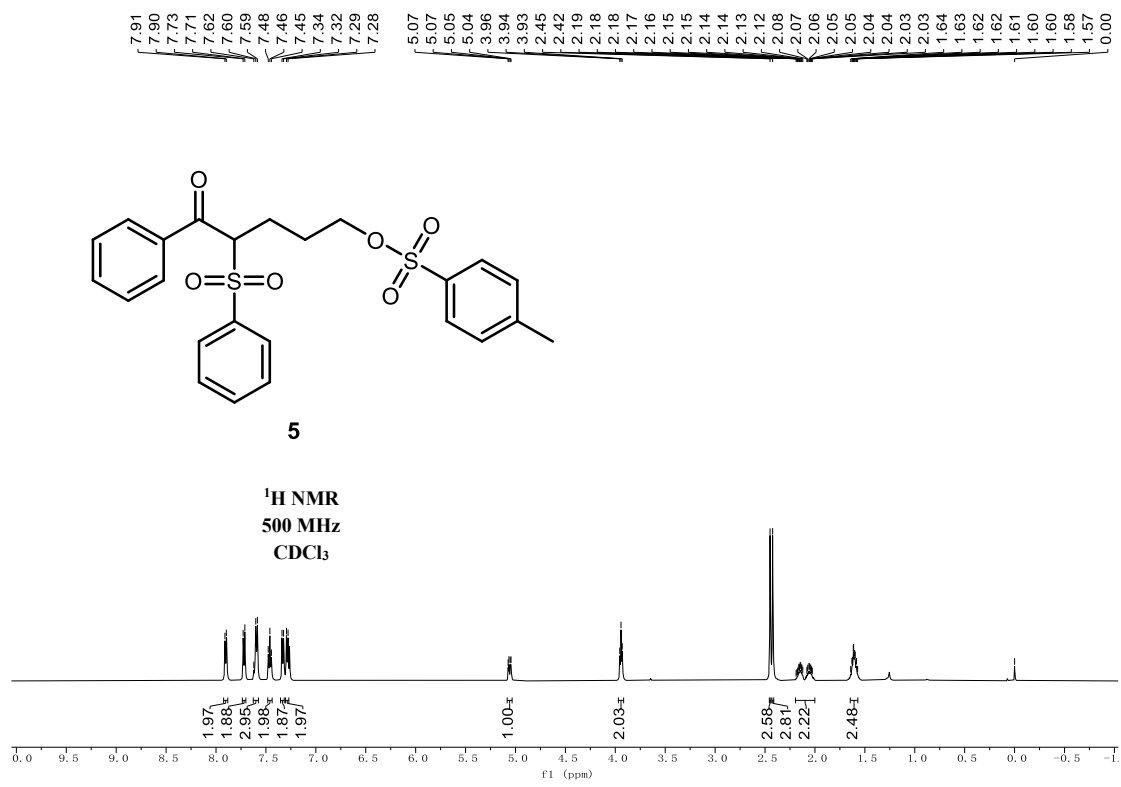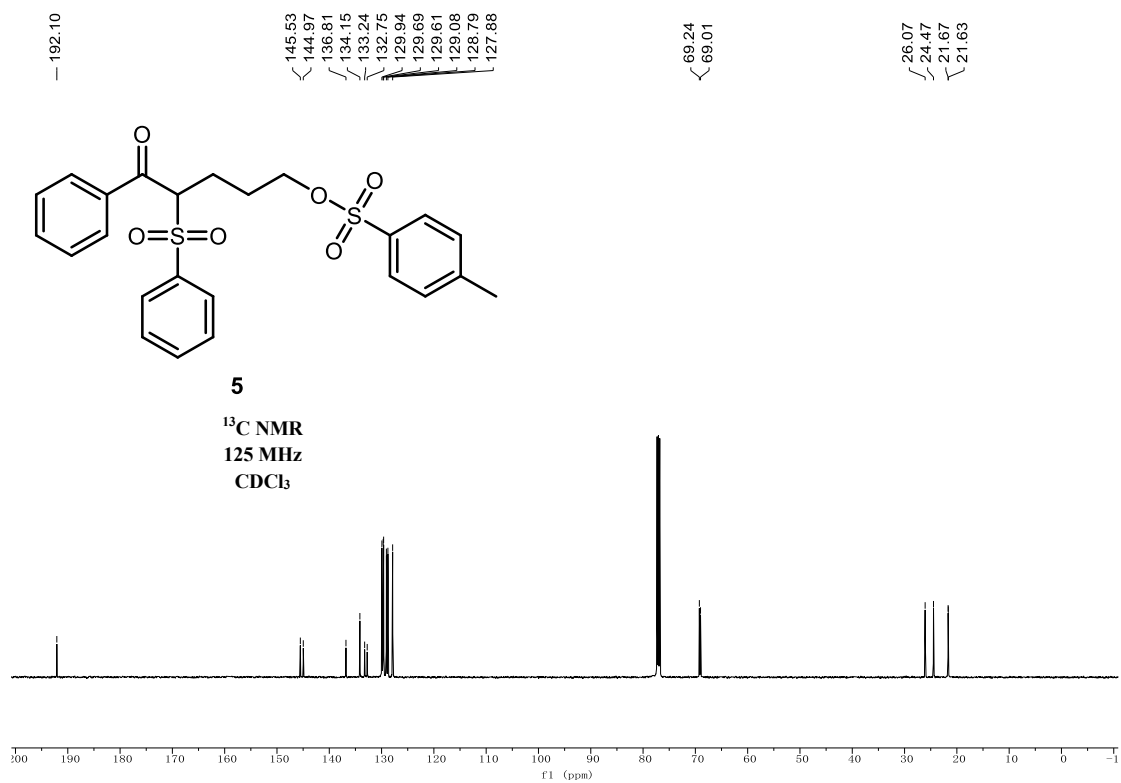

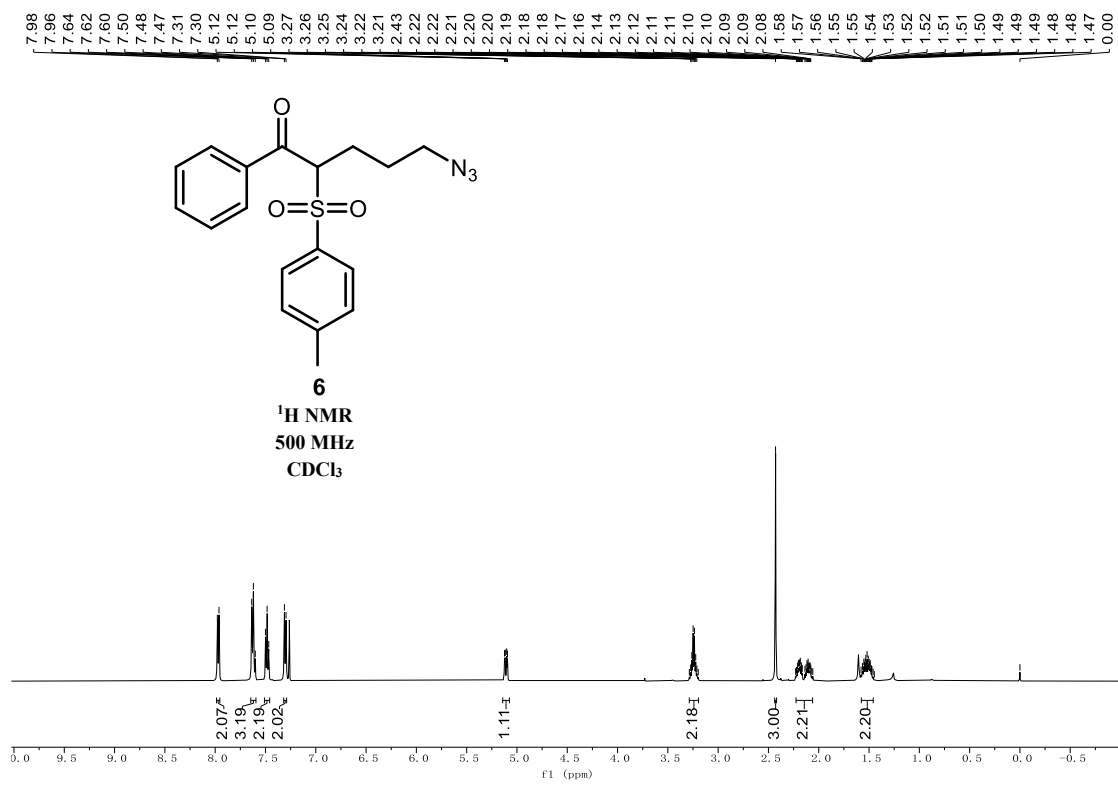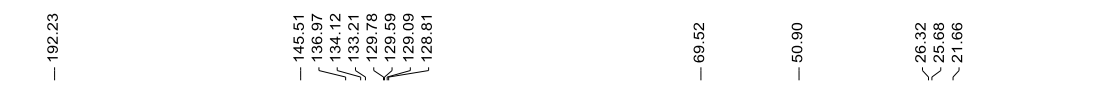

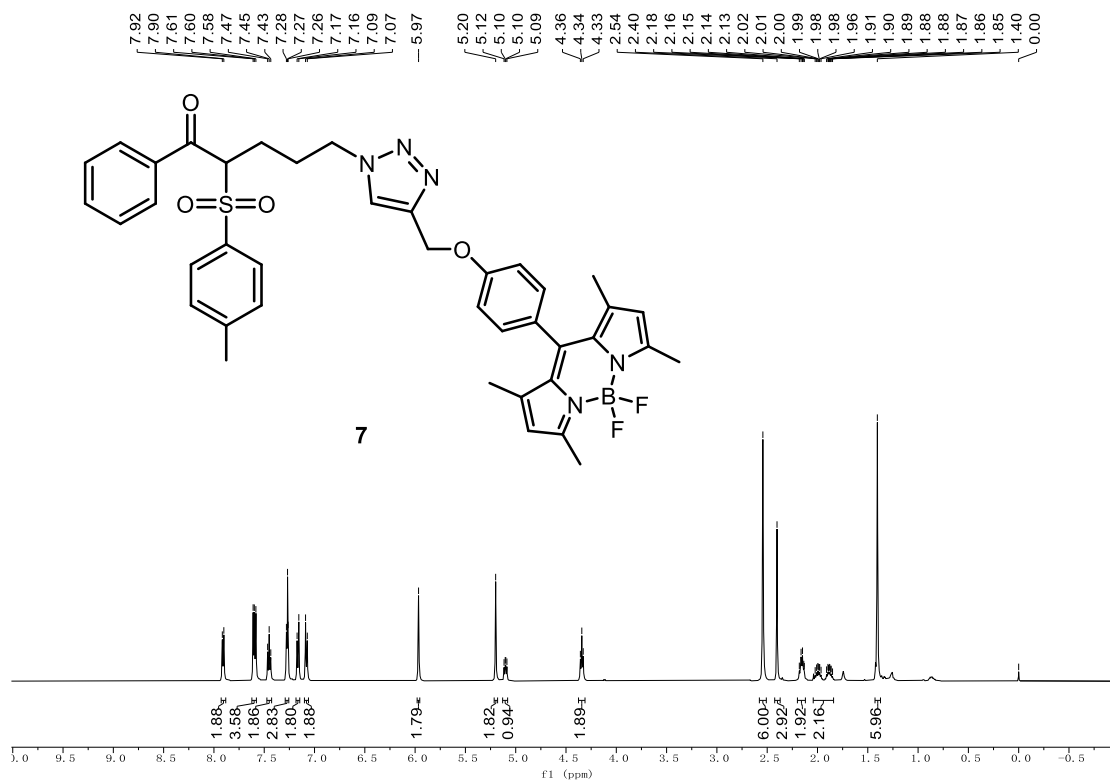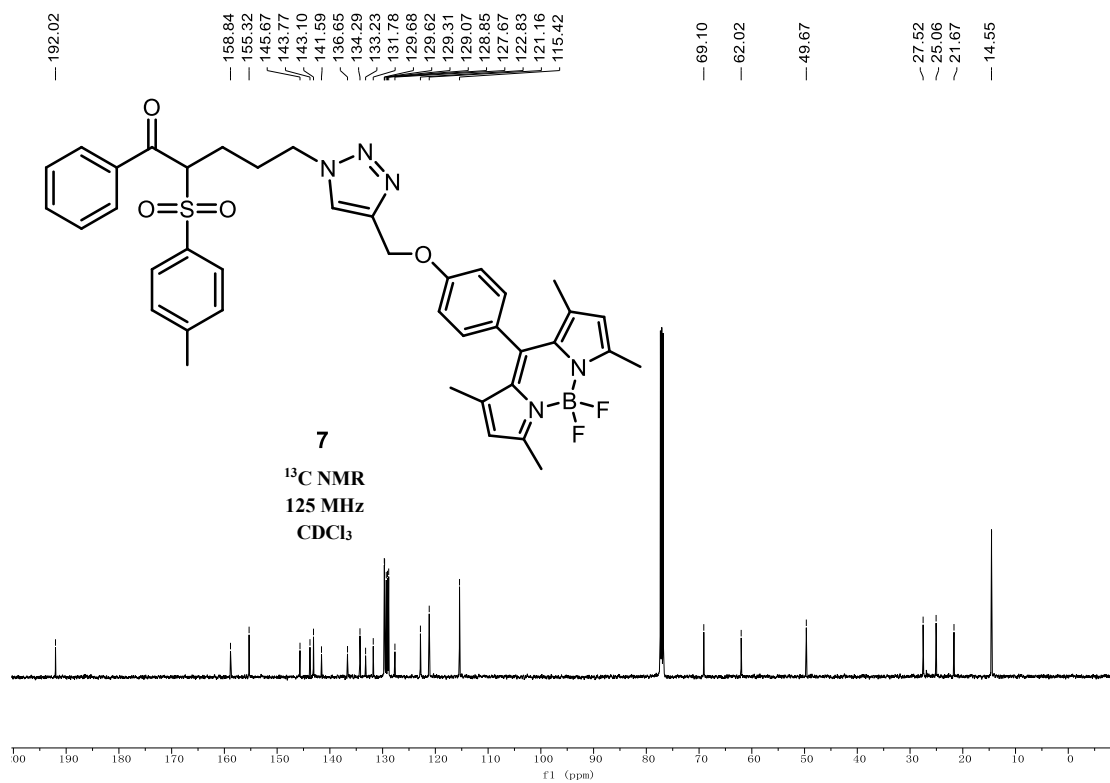

7.48  
7.46  
7.38  
7.37  
7.35  
7.34  
7.31  
7.29  
7.28  
7.21  
7.19  
7.15  
7.14  
7.10  
7.09  
6.99

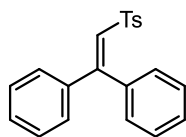

8

<sup>1</sup>H NMR  
500 MHz  
CDCl<sub>3</sub>

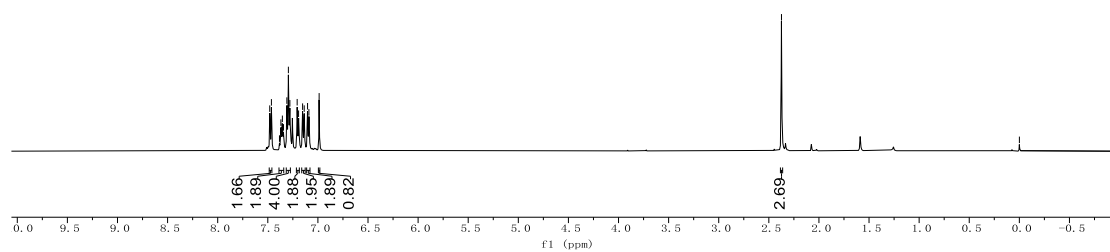

7.52  
7.51  
7.20  
7.18  
6.64

2.37  
1.81  
1.10  
-0.00

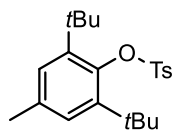

9

<sup>1</sup>H NMR  
500 MHz  
CDCl<sub>3</sub>

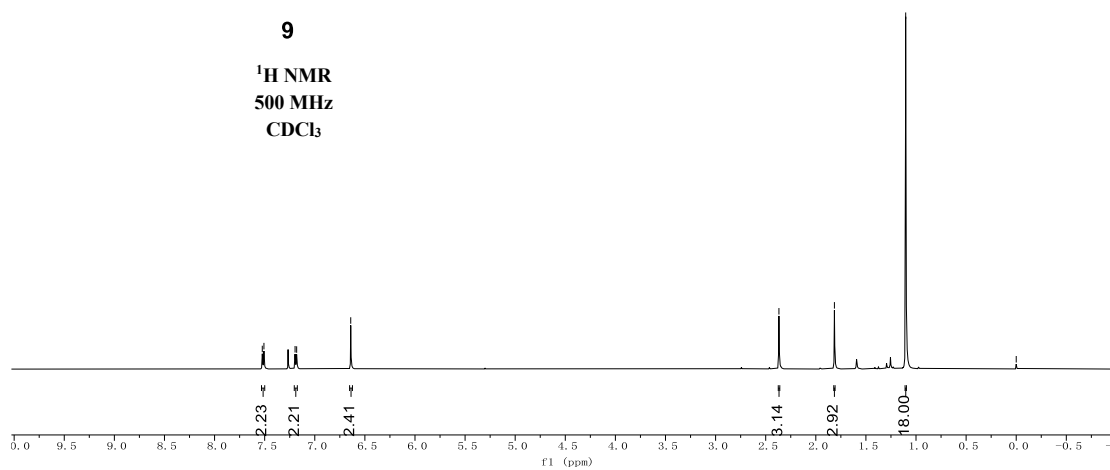

Supplement: d3cc03960a1.pdf [file d3cc03960a1.pdf]
